# Supplementary material for: Phylogenetic classification of the whole-genome sequences of SARS-CoV-2 from India & evolutionary trends
Source: PubMed Central journal article supplement — Indian J Med Res. 2021 Jan-Feb;153(1-2):166–74. doi: 10.4103/ijmr.IJMR_3418_20 (PMC8184080; doi:10.4103/ijmr.ijmr_3418_20), 2021

Supplementary Fig. 1. Neighbour-joining tree of the Indian genome sequences, with the taxa colour coded state-wise.

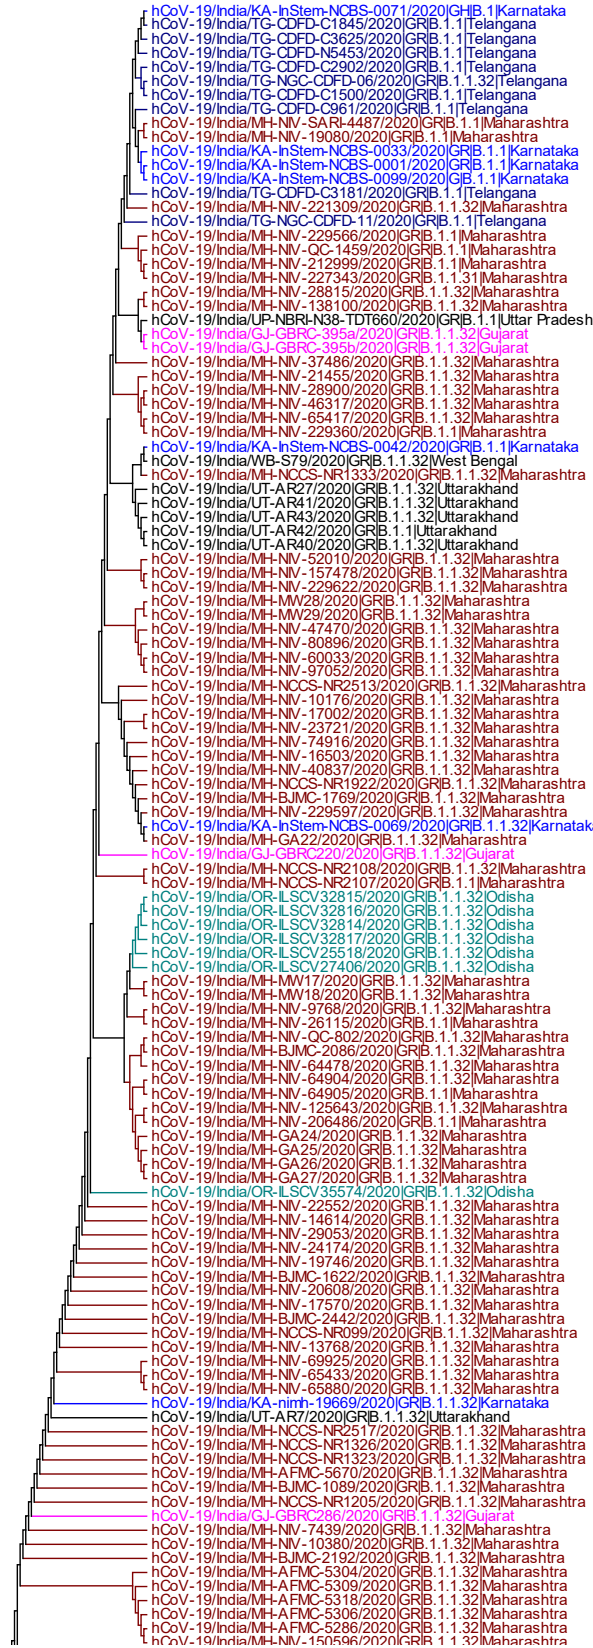

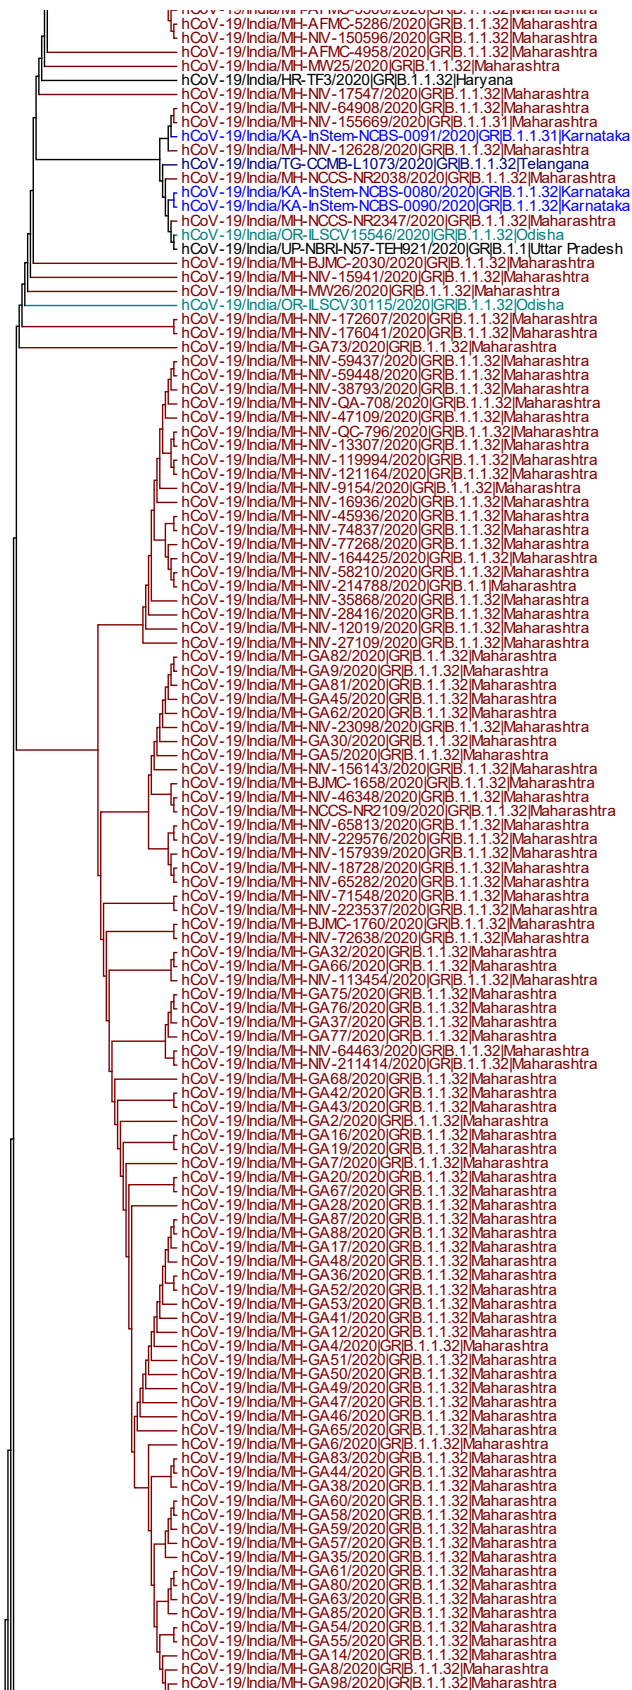

hCoV-19/India/MH-GA8/2020/GRB.1.1.32|Maharashtra  
hCoV-19/India/MH-GA9/2020/GRB.1.1.32|Maharashtra  
hCoV-19/India/MH-GA74/2020/GRB.1.1.32|Maharashtra  
hCoV-19/India/MH-GA13/2020/GRB.1.1.32|Maharashtra  
hCoV-19/India/MH-GA56/2020/GRB.1.1.32|Maharashtra  
hCoV-19/India/MH-NV-9157/2020/GRB.1.1.32|Maharashtra  
hCoV-19/India/MH-NCCS-NR2328/2020/GRB.1.1.32|Maharashtra  
hCoV-19/India/MH-NCCS-NR2329/2020/GRB.1.1.32|Maharashtra  
hCoV-19/India/MH-NV-229643/2020/GRB.1.1.32|Maharashtra  
hCoV-19/India/MH-NV-229644/2020/GRB.1.1.32|Maharashtra  
hCoV-19/India/MH-NV-37985/2020/GRB.1.1.32|Maharashtra  
hCoV-19/India/MH-NV-10419/2020/GRB.1.1.32|Maharashtra  
hCoV-19/India/MH-NV-37681/2020/GRB.1.1.32|Maharashtra  
hCoV-19/India/MH-NV-65847/2020/GRB.1.1.32|Maharashtra  
hCoV-19/India/MH-NV-12067/2020/GRB.1.1.32|Maharashtra  
hCoV-19/India/MH-NV-11670/2020/GRB.1.1.32|Maharashtra  
hCoV-19/India/MH-NV-64877/2020/GRB.1.1.32|Maharashtra  
hCoV-19/India/MH-NV-76773/2020/GRB.1.1.32|Maharashtra  
hCoV-19/India/MH-NV-12059/2020/GRB.1.1.32|Maharashtra  
hCoV-19/India/TG-CCMB-AA871/2020/GRB.1.1.32|Telangana  
hCoV-19/India/MH-AFMC-5653/2020/GRB.1.1.32|Maharashtra  
hCoV-19/India/UT-AR16/2020/GRB.1.1.32|Uttarakhand  
hCoV-19/India/MH-NV-11677/2020/GRB.1.1.32|Maharashtra  
hCoV-19/India/MH-NV-11676/2020/GRB.1.1.32|Maharashtra  
hCoV-19/India/MH-NV-216244/2020/GRB.1.1.32|Maharashtra  
hCoV-19/India/MH-NV-229461/2020/GRB.1.1.32|Maharashtra  
hCoV-19/India/MH-NV-229460/2020/GRB.1.1.32|Maharashtra  
hCoV-19/India/MH-BJMC-965/2020/GRB.1.1.32|Maharashtra  
hCoV-19/India/MH-BJMC-1123/2020/GRB.1.1.32|Maharashtra  
hCoV-19/India/MH-NV-20134/2020/GRB.1.1.32|Maharashtra  
hCoV-19/India/MH-NV-13804/2020/GRB.1.1.32|Maharashtra  
hCoV-19/India/MH-NV-215370/2020/GRB.1.1.32|Maharashtra  
hCoV-19/India/MH-NV-229665/2020/GRB.1.1.32|Maharashtra  
hCoV-19/India/MH-MV32/2020/GRB.1.1.32|Maharashtra  
hCoV-19/India/MH-MV33/2020/GRB.1.1.32|Maharashtra  
hCoV-19/India/MH-NV-QC-1804/2020/GRB.1.1.32|Maharashtra  
hCoV-19/India/MH-AFMC-5827/2020/GRB.1.1.32|Maharashtra  
hCoV-19/India/MH-NV-187756/2020/GRB.1.1.32|Maharashtra  
hCoV-19/India/MH-NV-101459/2020/GRB.1.1.32|Maharashtra  
hCoV-19/India/MH-NV-112247/2020/GRB.1.1.32|Maharashtra  
hCoV-19/India/OR-ILSCV21721/2020/GRB.1.1.32|Odisha  
hCoV-19/India/OR-ILSCV25524/2020/GRB.1.1.32|Odisha  
hCoV-19/India/MH-NCCS-NR2122/2020/GRB.1.1.32|Maharashtra  
hCoV-19/India/MH-BJMC-1727/2020/GRB.1.1.32|Maharashtra  
hCoV-19/India/MH-AFMC-5643/2020/GRB.1.1.32|Maharashtra  
hCoV-19/India/UP-NBR1-N29-TDV451/2020/GRB.1.1.32|Uttar Pradesh  
hCoV-19/India/MH-NV-229468/2020/GRB.1.1.32|Maharashtra  
hCoV-19/India/OR-ILSCV29997/2020/GRB.1.1.32|Odisha  
hCoV-19/India/MH-IGIB-D2/2020/GRB.1.1.32|Maharashtra  
hCoV-19/India/WB-S73/2020/GRB.1.1.32|West Bengal  
hCoV-19/India/KA-InStem-NCBS-0086/2020/GRB.1.1.32|Karnataka  
hCoV-19/India/UT-AR15/2020/GRB.1.1.32|Uttarakhand  
hCoV-19/India/WB-S70/2020/GRB.1.1.32|West Bengal  
hCoV-19/India/WB-S92/2020/GRB.1.1.32|West Bengal  
hCoV-19/India/MH-NV-57622/2020/GRB.1.1.32|Maharashtra  
hCoV-19/India/MH-NV-210557/2020/GRB.1.1.32|Maharashtra  
hCoV-19/India/MH-NV-210934/2020/GRB.1.1.32|Maharashtra  
hCoV-19/India/MH-NV-229539/2020/GRB.1.1.32|Maharashtra  
hCoV-19/India/MH-NV-229543/2020/GRB.1.1.32|Maharashtra  
hCoV-19/India/MH-NV-229545/2020/GRB.1.1.32|Maharashtra  
hCoV-19/India/MH-NV-229542/2020/GRB.1.1.32|Maharashtra  
hCoV-19/India/WB-S81/2020/GRB.1.1.32|West Bengal  
hCoV-19/India/KA-InStem-NCBS-0067/2020/GRB.1.1.32|Karnataka  
hCoV-19/India/UT-AR25/2020/GRB.1.1.32|Uttarakhand  
hCoV-19/India/UT-AR26/2020/GRB.1.1.32|Uttarakhand  
hCoV-19/India/GJ-GBRC97a/2020/GRB.1.1.32|Gujarat  
hCoV-19/India/GJ-GBRC97b/2020/GRB.1.1.32|Gujarat  
hCoV-19/India/MH-NV-QA-707/2020/GRB.1.1.32|Maharashtra  
hCoV-19/India/MH-BJMC-6185/2020/GRB.1.1.32|Maharashtra  
hCoV-19/India/UT-AR54/2020/GRB.1.1.32|Uttarakhand  
hCoV-19/India/OR-ILSCV30167/2020/GRB.1.1.32|Odisha  
hCoV-19/India/MH-NV-116690/2020/GRB.1.1.32|Maharashtra  
hCoV-19/India/MH-NV-7830/2020/GRB.1.1.32|Maharashtra  
hCoV-19/India/MH-NV-7832/2020/GRB.1.1.32|Maharashtra  
hCoV-19/India/MH-NV-QC-1844/2020/GRB.1.1.32|Maharashtra  
hCoV-19/India/MH-NV-QC-1848/2020/GRB.1.1.32|Maharashtra  
hCoV-19/India/MH-NV-45071/2020/GRB.1.1.32|Maharashtra  
hCoV-19/India/MH-GA70/2020/GRB.1.1.32|Maharashtra  
hCoV-19/India/MH-GA93/2020/GRB.1.1.32|Maharashtra  
hCoV-19/India/MH-GA69/2020/GRB.1.1.32|Maharashtra  
hCoV-19/India/MH-GA94/2020/GRB.1.1.32|Maharashtra  
hCoV-19/India/MH-GA15/2020/GRB.1.1.32|Maharashtra  
hCoV-19/India/MH-GA39/2020/GRB.1.1.32|Maharashtra  
hCoV-19/India/MH-GA31/2020/GRB.1.1.32|Maharashtra  
hCoV-19/India/MH-GA40/2020/GRB.1.1.32|Maharashtra  
hCoV-19/India/MH-GA21/2020/GRB.1.1.32|Maharashtra  
hCoV-19/India/MH-GA34/2020/GRB.1.1.32|Maharashtra  
hCoV-19/India/MH-GA86/2020/GRB.1.1.32|Maharashtra  
hCoV-19/India/MH-GA29/2020/GRB.1.1.32|Maharashtra  
hCoV-19/India/MH-GA72/2020/GRB.1.1.32|Maharashtra  
hCoV-19/India/MH-GA78/2020/GRB.1.1.32|Maharashtra  
hCoV-19/India/MH-GA79/2020/GRB.1.1.32|Maharashtra  
hCoV-19/India/MH-NV-29909/2020/GRB.1.1.32|Maharashtra  
hCoV-19/India/MH-NV-229467/2020/GRB.1.1.32|Maharashtra  
hCoV-19/India/MH-NV-73012/2020/GRB.1.1.32|Maharashtra  
hCoV-19/India/MH-NV-153805/2020/GRB.1.1.32|Maharashtra  
hCoV-19/India/MH-NV-216880/2020/GRB.1.1.32|Maharashtra  
hCoV-19/India/MH-NV-18650/2020/GRB.1.1.32|Maharashtra  
hCoV-19/India/MH-NV-73500/2020/GRB.1.1.32|Maharashtra  
hCoV-19/India/MH-NV-150015/2020/GRB.1.1.32|Maharashtra  
hCoV-19/India/MH-NV-185628/2020/GRB.1.1.32|Maharashtra  
hCoV-19/India/MH-AFMC-5807/2020/GRB.1.1.32|Maharashtra  
hCoV-19/India/MH-NV-122530/2020/GRB.1.1.32|Maharashtra  
hCoV-19/India/MH-NV-229715/2020/GRB.1.1.32|Maharashtra  
hCoV-19/India/MH-NV-229771/2020/GRB.1.1.32|Maharashtra  
hCoV-19/India/WB-S72/2020/GRB.1.1.32|West Bengal  
hCoV-19/India/WB-S74/2020/GRB.1.1.32|West Bengal  
hCoV-19/India/WB-S75/2020/GRB.1.1.32|West Bengal  
hCoV-19/India/MH-NV-31191/2020/GRB.1.1.32|Maharashtra  
hCoV-19/India/MH-NV-78532/2020/GRB.1.1.32|Maharashtra  
hCoV-19/India/MH-NV-226874/2020/GRB.1.1.32|Maharashtra  
hCoV-19/India/MH-NV-25950/2020/GRB.1.1.32|Maharashtra  
hCoV-19/India/MH-NV-42694/2020/GRB.1.1.32|Maharashtra  
hCoV-19/India/MH-NCCS-NR1474/2020/GRB.1.1.32|Maharashtra  
hCoV-19/India/MH-NV-15351/2020/GRB.1.1.32|Maharashtra  
hCoV-19/India/MH-BJMC-2035/2020/GRB.1.1.32|Maharashtra  
hCoV-19/India/MH-NV-36461/2020/GRB.1.1.32|Maharashtra  
hCoV-19/India/MH-NV-65961/2020/GRB.1.1.32|Maharashtra  
hCoV-19/India/MH-NV-15768/2020/GRB.1.1.32|Maharashtra  
hCoV-19/India/MH-NV-15115/2020/GRB.1.1.32|Maharashtra



hCoV-19/India/TG-NGC-CDFD-07/2020/GRB.1.1.32|Telangana  
hCoV-19/India/TG-CDFD-C3145/2020/GRB.1.1.32|Telangana  
hCoV-19/India/TG-CCMB-M712/2020/GRB.1.1.32|Telangana  
hCoV-19/India/TG-CDFD-C2169/2020/GRB.1.1.32|Telangana  
hCoV-19/India/TG-CCMB-L1724/2020/GRB.1.1.32|Telangana  
hCoV-19/India/TG-CCMB-L1089/2020/GRB.1.1.32|Telangana  
hCoV-19/India/TG-CCMB-L1090/2020/GRB.1.1.32|Telangana  
hCoV-19/India/TG-CCMB-L1930/2020/GRB.1.1.32|Telangana  
hCoV-19/India/TG-CCMB-M25/2020/GRB.1.1.32|Telangana  
hCoV-19/India/TG-CCMB-M895/2020/GRB.1.1.32|Telangana  
hCoV-19/India/TG-CCMB-M717/2020/GRB.1.1.32|Telangana  
hCoV-19/India/TG-CCMB-M489/2020/GRB.1.1.32|Telangana  
hCoV-19/India/TG-CCMB-L1959/2020/GRB.1.1.32|Telangana  
hCoV-19/India/TG-CCMB-L1694/2020/GRB.1.1.32|Telangana  
hCoV-19/India/TG-CCMB-AA32/2020/GRB.1.1.32|Telangana  
hCoV-19/India/TG-CDFD-C2350/2020/GRB.1.1.32|Telangana  
hCoV-19/India/TG-CDFD-N4895/2020/GRB.1.1.32|Telangana  
hCoV-19/India/TG-CDFD-N4893/2020/GRB.1.1.32|Telangana  
hCoV-19/India/TG-CDFD-N5246/2020/GRB.1.1.32|Telangana  
hCoV-19/India/TG-CCMB-M170/2020/GRB.1.1.32|Telangana  
hCoV-19/India/TG-CCMB-M882/2020/GRB.1.1.32|Telangana  
hCoV-19/India/TG-NGC-CDFD-12/2020/GRB.1.1.32|Telangana  
hCoV-19/India/TG-CDFD-C2910/2020/GRB.1.1.32|Telangana  
hCoV-19/India/TG-CDFD-C1359/2020/GRB.1.1.32|Telangana  
hCoV-19/India/TG-CDFD-C2520/2020/GRB.1.1.32|Telangana  
hCoV-19/India/TG-CDFD-C2529/2020/GRB.1.1.32|Telangana  
hCoV-19/India/TG-CCMB-L1675/2020/GRB.1.1.32|Telangana  
hCoV-19/India/TG-CDFD-N4912/2020/GRB.1.1.32|Telangana  
hCoV-19/India/TG-CCMB-L1743/2020/GRB.1.1.32|Telangana  
hCoV-19/India/TG-CDFD-C1342/2020/GRB.1.1.8|Telangana  
hCoV-19/India/TG-CCMB-M750/2020/GRB.1.1.32|Telangana  
hCoV-19/India/OR-ILSCV16514/2020/GRB.1.1.32|Odisha  
hCoV-19/India/TG-CCMB-L1809/2020/GRB.1.1.32|Telangana  
hCoV-19/India/TG-CCMB-AA700/2020/GRB.1.1.32|Telangana  
hCoV-19/India/OR-ILSCV15547/2020/GRB.1.1.32|Odisha  
hCoV-19/India/OR-ILSCV15552/2020/GRB.1.1.32|Odisha  
hCoV-19/India/TG-CCMB-M357/2020/GRB.1.1.32|Telangana  
hCoV-19/India/TG-CCMB-M441/2020/GRB.1.1.32|Telangana  
hCoV-19/India/TG-CCMB-L1085/2020/GRB.1.1.32|Telangana  
hCoV-19/India/TG-CCMB-M700/2020/GRB.1.1.32|Telangana  
hCoV-19/India/TG-CCMB-M711/2020/GRB.1.1.32|Telangana  
hCoV-19/India/TG-CCMB-M818/2020/GRB.1.1.32|Telangana  
hCoV-19/India/TG-CCMB-L1726/2020/GRB.1.1.32|Telangana  
hCoV-19/India/TG-CCMB-L1728/2020/GRB.1.1.32|Telangana  
hCoV-19/India/TG-CCMB-AA370/2020/GRB.1.1.32|Telangana  
hCoV-19/India/TG-CCMB-AA372/2020/GRB.1.1.32|Telangana  
hCoV-19/India/TG-CCMB-A8927/2020/GRB.1.1.32|Telangana  
hCoV-19/India/TG-CCMB-AA403/2020/GRB.1.1.32|Telangana  
hCoV-19/India/TG-CCMB-AA375/2020/GRB.1.1.32|Telangana  
hCoV-19/India/TG-CCMB-AA371/2020/GRB.1.1.32|Telangana  
hCoV-19/India/TG-CCMB-AA373/2020/GRB.1.1.32|Telangana  
hCoV-19/India/TG-CCMB-AA340/2020/GRB.1.1.32|Telangana  
hCoV-19/India/TG-CCMB-W863/2020/GRB.1.1.32|Telangana  
hCoV-19/India/TG-CCMB-X113/2020/GRB.1.1.32|Telangana  
hCoV-19/India/TG-CCMB-W899/2020/GRB.1.1.32|Telangana  
hCoV-19/India/TG-CCMB-R339/2020/GRB.1.1.32|Telangana  
hCoV-19/India/TG-CCMB-X76/2020/GRB.1.1.32|Telangana  
hCoV-19/India/TG-CCMB-W999/2020/GRB.1.1.32|Telangana  
hCoV-19/India/TG-CCMB-L1554/2020/GRB.1.1.32|Telangana  
hCoV-19/India/TG-CCMB-OM10/2020/GRB.1.1.32|Telangana  
hCoV-19/India/TG-CCMB-A475/2020/GRB.1.1.32|Telangana  
hCoV-19/India/TG-CCMB-AB610/2020/GRB.1.1.32|Telangana  
hCoV-19/India/TG-CCMB-AB603/2020/GRB.1.1.32|Telangana  
hCoV-19/India/TG-CCMB-L1963/2020/GRB.1.1.32|Telangana  
hCoV-19/India/TG-CDFD-N5309/2020/GRB.1.1.32|Telangana  
hCoV-19/India/TG-CCMB-L1564/2020/GRB.1.1.32|Telangana  
hCoV-19/India/TG-CCMB-AA378/2020/GRB.1.1.32|Telangana  
hCoV-19/India/TG-CCMB-AA608/2020/GRB.1.1.32|Telangana  
hCoV-19/India/TG-CCMB-L1935/2020/GRB.1.1.32|Telangana  
hCoV-19/India/TG-CCMB-M465/2020/GRB.1.1.32|Telangana  
hCoV-19/India/TG-CCMB-L1657/2020/GRB.1.1.32|Telangana  
hCoV-19/India/TG-CDFD-C2901/2020/GRB.1.1.32|Telangana  
hCoV-19/India/TG-CCMB-AA105/2020/GRB.1.1.32|Telangana  
hCoV-19/India/TG-CCMB-AA28/2020/GRB.1.1.32|Telangana  
hCoV-19/India/GJ-GBRC327a/2020/GRB.1.1|Gujarat  
hCoV-19/India/KA-InStem-NCBS-0022/2020/GRB.1.1|Karnataka  
hCoV-19/India/GJ-GBRC270/2020/GRB.1.1.32|Gujarat  
hCoV-19/India/GJ-GBRC327a/2020/GRB.1.1|Gujarat  
hCoV-19/India/GJ-GBRC327b/2020/GRB.1.1.13|Gujarat  
hCoV-19/India/MH-NIV-64880/2020/GRB.1.1|Maharashtra  
hCoV-19/India/MH-NIV-114444/2020/GRB.1.1|Maharashtra  
hCoV-19/India/MH-NIV-159293/2020/GRB.1.1|Maharashtra  
hCoV-19/India/MH-NIV-5097/2020/OJB.2|Maharashtra  
hCoV-19/India/MH-NIV-5815-1/2020/OJB.6|Maharashtra  
hCoV-19/India/GJ-GBRC15/2020/SIA|Gujarat  
hCoV-19/India/MH-NIV-65815/2020/OJB.1|Maharashtra  
hCoV-19/India/MH-NIV-65281/2020/OJB.1.1.32|Maharashtra  
hCoV-19/India/MH-NIV-65819/2020/OJB.1.1.32|Maharashtra  
hCoV-19/India/MH-NIV-11699/2020/GRB.1.1.32|Maharashtra  
hCoV-19/India/MH-NIV-60205/2020/GRB.1.1|Maharashtra  
hCoV-19/India/MH-NIV-9127/2020/OJB.1.1.32|Maharashtra  
hCoV-19/India/MH-NIV-206956/2020/GRB.1.1.32|Maharashtra  
hCoV-19/India/MH-NIV-219744/2020/GRB.1.1|Maharashtra  
hCoV-19/India/MH-NIV-159610/2020/GRB.1.1.32|Maharashtra  
hCoV-19/India/MH-NIV-10435/2020/GRB.1.1.32|Maharashtra  
hCoV-19/India/MH-NIV-39037/2020/GRB.1.1.32|Maharashtra  
hCoV-19/India/MH-NIV-206926/2020/GRB.1.1|Maharashtra  
hCoV-19/India/MH-NIV-206415/2020/GRB.1.1|Maharashtra  
hCoV-19/India/MH-NIV-11182/2020/GRB.1.1.32|Maharashtra  
hCoV-19/India/MH-NIV-203951/2020/GRB.1.1|Maharashtra  
hCoV-19/India/MH-NIV-191373/2020/GRB.1.1|Maharashtra  
hCoV-19/India/MH-NIV-218275/2020/GRB.1.1.32|Maharashtra  
hCoV-19/India/MH-NIV-208140/2020/GRB.1.1|Maharashtra  
hCoV-19/India/UT-AR30/2020/GRB.1.1|Uttarakhand  
hCoV-19/India/UT-AR31/2020/GRB.1.1|Uttarakhand  
hCoV-19/India/UT-AR62/2020/GRB.1.1|Uttarakhand  
hCoV-19/India/UT-AR60/2020/GRB.1.1|Uttarakhand  
hCoV-19/India/UT-AR61/2020/GRB.1.1|Uttarakhand  
hCoV-19/India/DL-MaxCov0010-CSIR-IGIB/2020/OJB.1.1|Delhi  
hCoV-19/India/DL-MaxCov0022-CSIR-IGIB/2020/OJB.1.1|Delhi  
hCoV-19/India/HR-IMT-CB126/2020/OJB.1.1|Haryana  
hCoV-19/India/OR-ILSCV27412/2020/GRB.1.1|Odisha  
hCoV-19/India/OR-ILSCV27409/2020/GRB.1.1|Odisha  
hCoV-19/India/KA-nimh-0130/2020/GRB.1.1|Karnataka  
hCoV-19/India/KA-nimh-0182/2020/GRB.1.1|Karnataka  
hCoV-19/India/KA-nimh-0113/2020/GRB.1.1|Karnataka  
hCoV-19/India/DL-MaxCov0010-CSIR-IGIB/2020/OJB.1.1|Delhi  
hCoV-19/India/TG-CCMB-A314/2020/GRB.1.1.32|Telangana  
hCoV-19/India/TG-CCMB-AA636/2020/GRB.1.1.32|Telangana

hCoV-19/India/TG-CCMB-AC314/2020/GRB.1.1.32|Telangana  
hCoV-19/India/TG-CCMB-AA636/2020/GRB.1.1.32|Telangana  
hCoV-19/India/TG-CCMB-L1762/2020/GRB.1.1.32|Telangana  
hCoV-19/India/TG-CCMB-AA344/2020/GRB.1.1|Telangana  
hCoV-19/India/UP-NBRI-N46-TCC289/2020/GRB.1.1|Uttar Pradesh  
hCoV-19/India/MH-MMV40/2020/GRB.1.1|Maharashtra  
hCoV-19/India/PB-IMT-P131/2020/GRB.1.1|Punjab  
hCoV-19/India/PB-IMT-P151/2020/GRB.1.1|Punjab  
hCoV-19/India/OR-RMRC2/2020/GRB.1.1|Odisha  
hCoV-19/India/DL-NCDC7624-CSIR-IGB/2020/GRB.1.1|Delhi  
hCoV-19/India/DL-MN5/2020/GRB.1.1|Delhi  
hCoV-19/India/DL-MN10/2020/GRB.1.1|Delhi  
hCoV-19/India/DL-MN11/2020/GRB.1.1|Delhi  
hCoV-19/India/UT-AR5/2020/GRB.1.1|Uttarakhand  
hCoV-19/India/UT-AR8/2020/GRB.1.1|Uttarakhand  
hCoV-19/India/UT-AR10/2020/GRB.1.1|Uttarakhand  
hCoV-19/India/UT-AR12/2020/GRB.1.1|Uttarakhand  
hCoV-19/India/UT-AR4/2020/GRB.1.1|Uttarakhand  
hCoV-19/India/UT-AR9/2020/GRB.1.1|Uttarakhand  
hCoV-19/India/KA-InStem-NCBS-0039/2020/GRB.1.1|Karnataka  
hCoV-19/India/KA-InStem-NCBS-0076/2020/GRB.1.1|Karnataka  
hCoV-19/India/KA-InStem-NCBS-0073/2020/GRB.1.1|Karnataka  
hCoV-19/India/KA-InStem-NCBS-0028/2020/GRB.1.1|Karnataka  
hCoV-19/India/KA-InStem-NCBS-0037/2020/GRB.1.1|Karnataka  
hCoV-19/India/KA-IB31/2020/GRB.1.1|Karnataka  
hCoV-19/India/TG-CDFD-C1486/2020/GRB.1.1|Telangana  
hCoV-19/India/KA-InStem-NCBS-0040/2020/GRB.1.1|Karnataka  
hCoV-19/India/KA-InStem-NCBS-0002/2020/GRB.1.1|Karnataka  
hCoV-19/India/KA-InStem-NCBS-0026/2020/GRB.1.1|Karnataka  
hCoV-19/India/KA-InStem-NCBS-0092/2020/GRB.1.1|Karnataka  
hCoV-19/India/KA-B1/2020/GRB.1.1|Karnataka  
hCoV-19/India/KA-B34/2020/GRB.1.1|Karnataka  
hCoV-19/India/KA-B39/2020/GRB.1.1|Karnataka  
hCoV-19/India/KA-B43/2020/GRB.1.1|Karnataka  
hCoV-19/India/TN-CCMB-C15/2020/GRB.1.1|Tamil Nadu  
hCoV-19/India/KA-InStem-NCBS-0095/2020/GRB.1.1|Karnataka  
hCoV-19/India/KA-InStem-NCBS-0012/2020/GRB.1.1|Karnataka  
hCoV-19/India/KA-B36/2020/GRB.1.1|Karnataka  
hCoV-19/India/KA-B28/2020/GRB.1.1|Karnataka  
hCoV-19/India/KA-B33/2020/GRB.1.1|Karnataka  
hCoV-19/India/KA-InStem-NCBS-0075/2020/GRB.1.1|Karnataka  
hCoV-19/India/KA-InStem-NCBS-0025/2020/GRB.1.1|Karnataka  
hCoV-19/India/KA-B7/2020/GRB.1.1|Karnataka  
hCoV-19/India/KA-B19/2020/GRB.1.1|Karnataka  
hCoV-19/India/KA-B6/2020/GRB.1.1|Karnataka  
hCoV-19/India/KA-B5/2020/GRB.1.1|Karnataka  
hCoV-19/India/KA-B42/2020/GRB.1.1|Karnataka  
hCoV-19/India/KA-B40/2020/GRB.1.1|Karnataka  
hCoV-19/India/KA-B32/2020/GRB.1.1|Karnataka  
hCoV-19/India/KA-B3/2020/GRB.1.1|Karnataka  
hCoV-19/India/KA-B26/2020/GRB.1.1|Karnataka  
hCoV-19/India/KA-B21/2020/GRB.1.1|Karnataka  
hCoV-19/India/KA-B2/2020/GRB.1.1|Karnataka  
hCoV-19/India/KA-B18/2020/GRB.1.1|Karnataka  
hCoV-19/India/KA-B16/2020/GRB.1.1|Karnataka  
hCoV-19/India/KA-B15/2020/GRB.1.1|Karnataka  
hCoV-19/India/KA-B13/2020/GRB.1.1|Karnataka  
hCoV-19/India/KA-B11/2020/GRB.1.1|Karnataka  
hCoV-19/India/KA-InStem-NCBS-0097/2020/GRB.1.1|Karnataka  
hCoV-19/India/KA-InStem-NCBS-0098/2020/GRB.1.1|Karnataka  
hCoV-19/India/KA-InStem-NCBS-0084/2020/GRB.1.1|Karnataka  
hCoV-19/India/KA-InStem-NCBS-0093/2020/GRB.1.1|Karnataka  
hCoV-19/India/KA-InStem-NCBS-0074/2020/GRB.1.1|Karnataka  
hCoV-19/India/TN-CCMB-C9/2020/GRB.1.1|Tamil Nadu  
hCoV-19/India/KA-InStem-NCBS-0032/2020/GRB.1.1|Karnataka  
hCoV-19/India/KA-B4/2020/GRB.1.1|Karnataka  
hCoV-19/India/KA-B12/2020/GRB.1.1|Karnataka  
hCoV-19/India/KA-InStem-NCBS-0082/2020/GRB.1.1|Karnataka  
hCoV-19/India/KA-B9/2020/GRB.1.1|Karnataka  
hCoV-19/India/KA-B4/2020/GRB.1.1|Karnataka  
hCoV-19/India/KA-InStem-NCBS-0096/2020/GRB.1.1|Karnataka  
hCoV-19/India/KA-InStem-NCBS-0035/2020/GRB.1.1|Karnataka  
hCoV-19/India/KA-InStem-NCBS-0041/2020/GRB.1.1|Karnataka  
hCoV-19/India/KA-B17/2020/GRB.1.1|Karnataka  
hCoV-19/India/TN-CCMB-C16/2020/GRB.1.1|Tamil Nadu  
hCoV-19/India/TN-CCMB-C18/2020/GRB.1.1|Tamil Nadu  
hCoV-19/India/KA-InStem-NCBS-0014/2020/GRB.1.1|Karnataka  
hCoV-19/India/KA-B62/2020/GRB.1.1|Karnataka  
hCoV-19/India/KA-B8/2020/GRB.1.1|Karnataka  
hCoV-19/India/TN-CCMB-C4-15/2020/GRB.1.1|Tamil Nadu  
hCoV-19/India/KA-B48/2020/GRB.1.1|Karnataka  
hCoV-19/India/KA-InStem-NCBS-0027/2020/GRB.1.1|Karnataka  
hCoV-19/India/UP-NBRI-N21-TDU019/2020/GRB.1.1|Uttar Pradesh  
hCoV-19/India/KA-InStem-NCBS-0031/2020/GRB.1.1|Karnataka  
hCoV-19/India/MH-NIV-46303/2020/GRB.1.1.32|Maharashtra  
hCoV-19/India/KA-B59/2020/GRB.1.1|Karnataka  
hCoV-19/India/KA-B54/2020/GRB.1.1|Karnataka  
hCoV-19/India/UT-AR57/2020/GRB.1.1|Uttarakhand  
hCoV-19/India/TN-CCMB-C12/2020/GRB.1.1|Tamil Nadu  
hCoV-19/India/KA-B24/2020/GRB.1.1|Karnataka  
hCoV-19/India/KA-B44/2020/GRB.1.1|Karnataka  
hCoV-19/India/KA-B29/2020/GRB.1.1|Karnataka  
hCoV-19/India/WB-S5/2020/GRB.1.1|West Bengal  
hCoV-19/India/TN-CCMB-C8/2020/GRB.1.1|Tamil Nadu  
hCoV-19/India/TN-CCMB-C10/2020/GRB.1.1|Tamil Nadu  
hCoV-19/India/OR-LSCV25591/2020/GRB.1.1|Odisha  
hCoV-19/India/OR-LSCV25594/2020/GRB.1.1|Odisha  
hCoV-19/India/TN-CCMB-C7/2020/GRB.1.1|Tamil Nadu  
hCoV-19/India/TN-CCMB-C17/2020/GRB.1.1|Tamil Nadu  
hCoV-19/India/OR-LSCV20557/2020/GRB.1.1|Odisha  
hCoV-19/India/TN-CCMB-C14/2020/GRB.1.1|Tamil Nadu  
hCoV-19/India/KA-B25/2020/GRB.1.1|Karnataka  
hCoV-19/India/OR-LSCV35351/2020/GRB.1.1|Odisha  
hCoV-19/India/OR-LSCV35376/2020/GRB.1.1|Odisha  
hCoV-19/India/OR-LSCV35353/2020/GRB.1.1|Odisha  
hCoV-19/India/OR-LSCV35333/2020/GRB.1.1|Odisha  
hCoV-19/India/OR-LSCV32899/2020/GRB.1.1|Odisha  
hCoV-19/India/OR-LSCV32898/2020/GRB.1.1|Odisha  
hCoV-19/India/OR-LSCV35350/2020/GRB.1.1|Odisha  
hCoV-19/India/OR-LSCV35317/2020/GRB.1.1|Odisha  
hCoV-19/India/OR-LSCV35366/2020/GRB.1.1|Odisha  
hCoV-19/India/OR-LSCV35141/2020/GRB.1.1|Odisha  
hCoV-19/India/TN-CCMB-C19/2020/GRB.1.1|Tamil Nadu  
hCoV-19/India/OR-LSCV28955/2020/GRB.1.1|Odisha  
hCoV-19/India/TG-CCMB-AA01/2020/GRB.1.1|Telangana  
hCoV-19/India/TG-CCMB-AA33/2020/GRB.1.1|Telangana  
hCoV-19/India/TG-CCMB-AB05/2020/GRB.1.1|Telangana  
hCoV-19/India/TG-CCMB-AA241/2020/GRB.1.1|Telangana  
hCoV-19/India/OR-LSCV28954/2020/GRB.1.1|Odisha

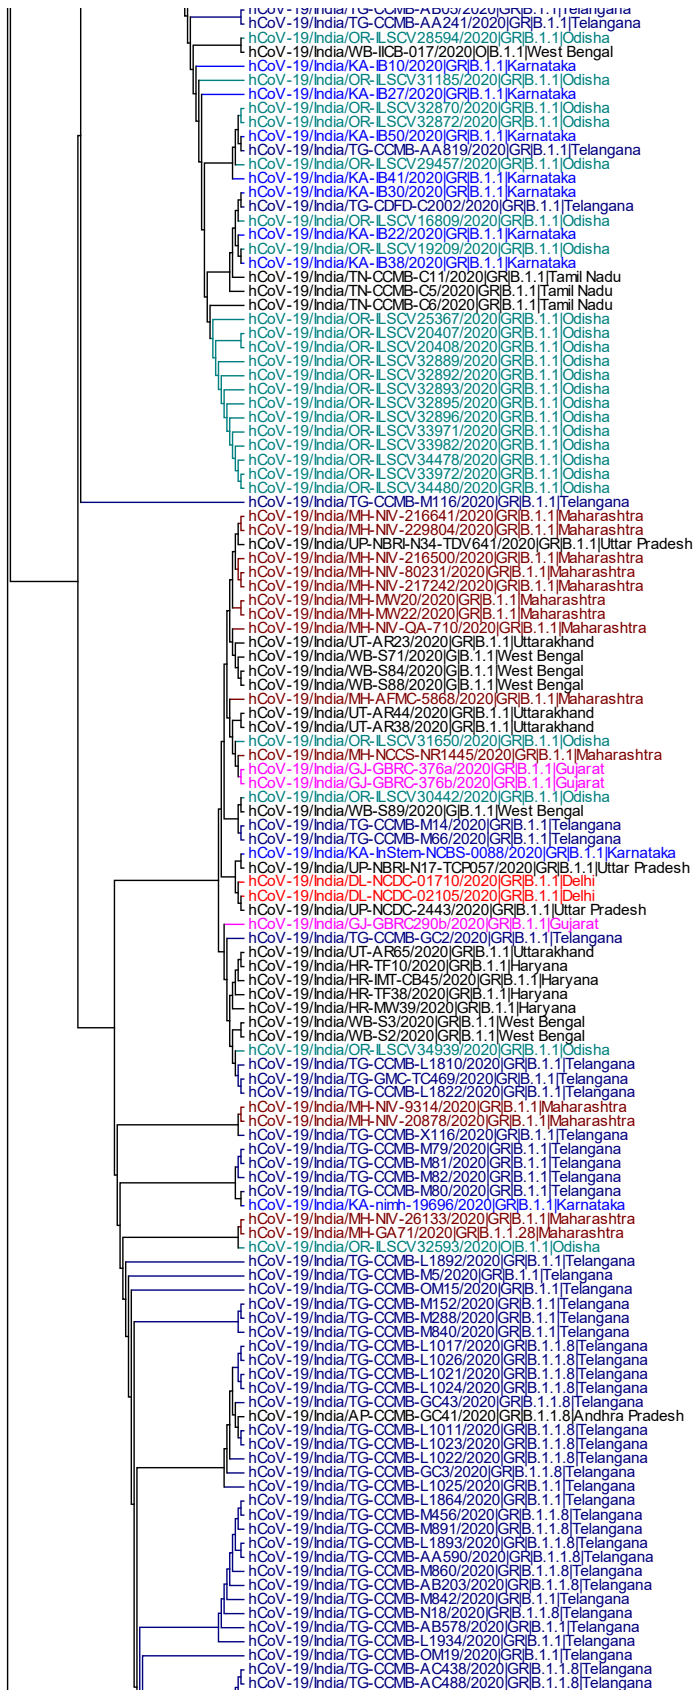





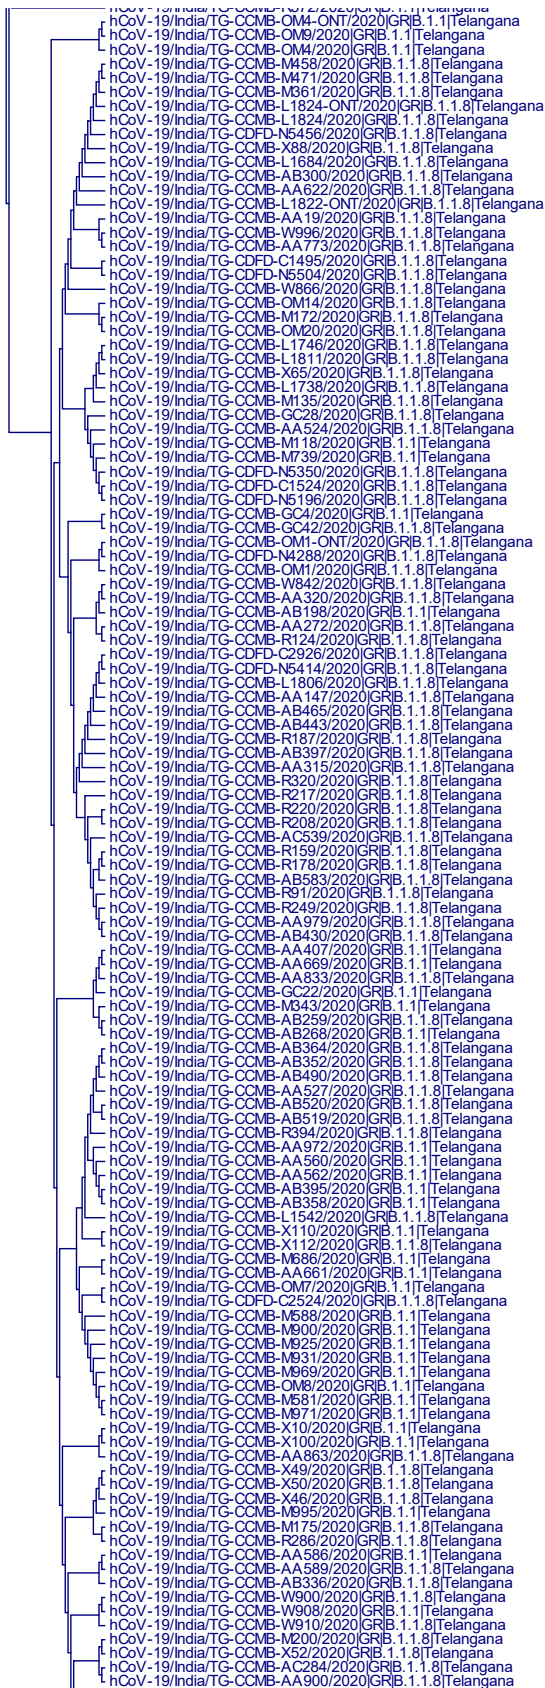

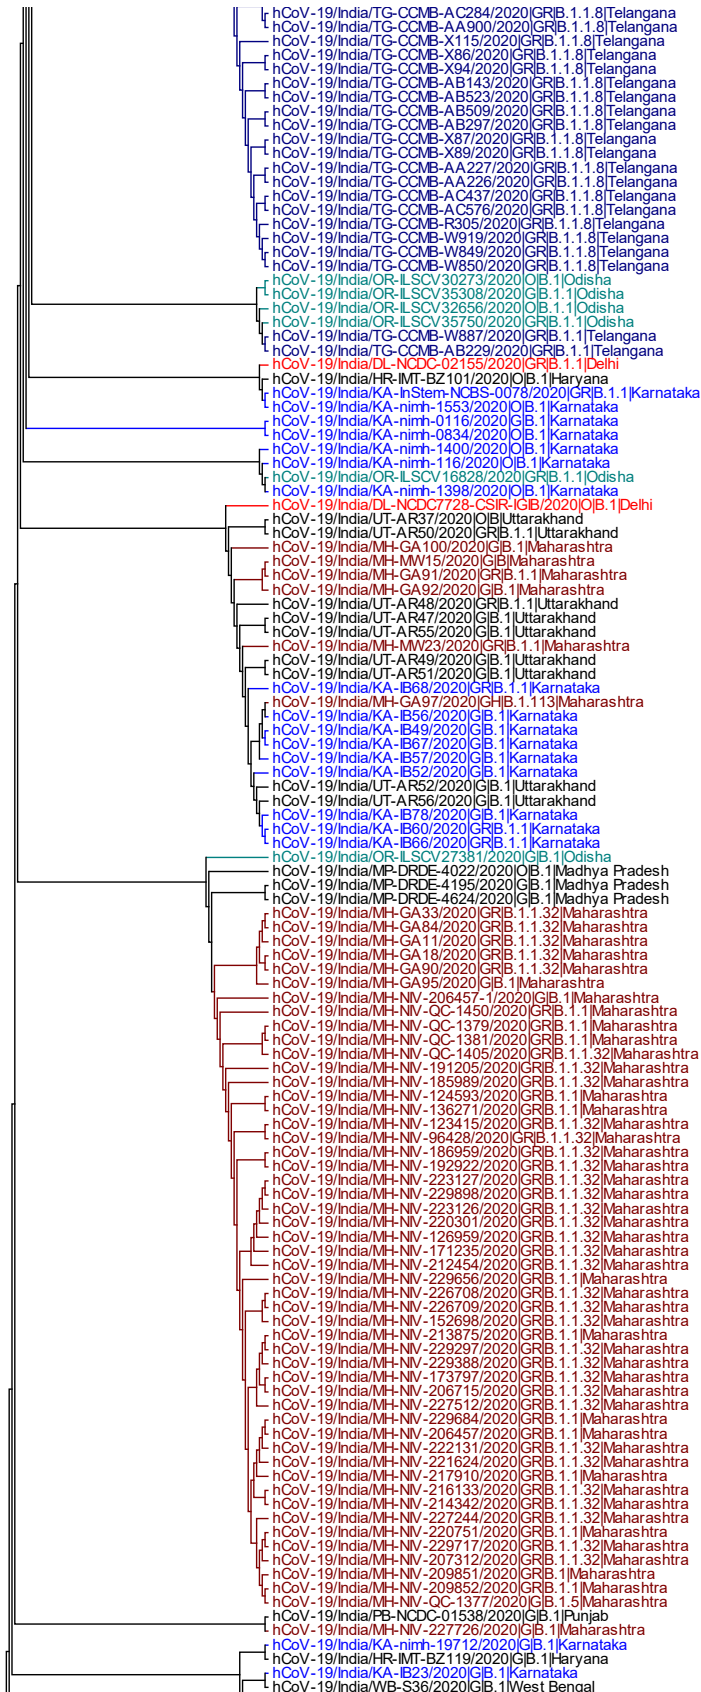

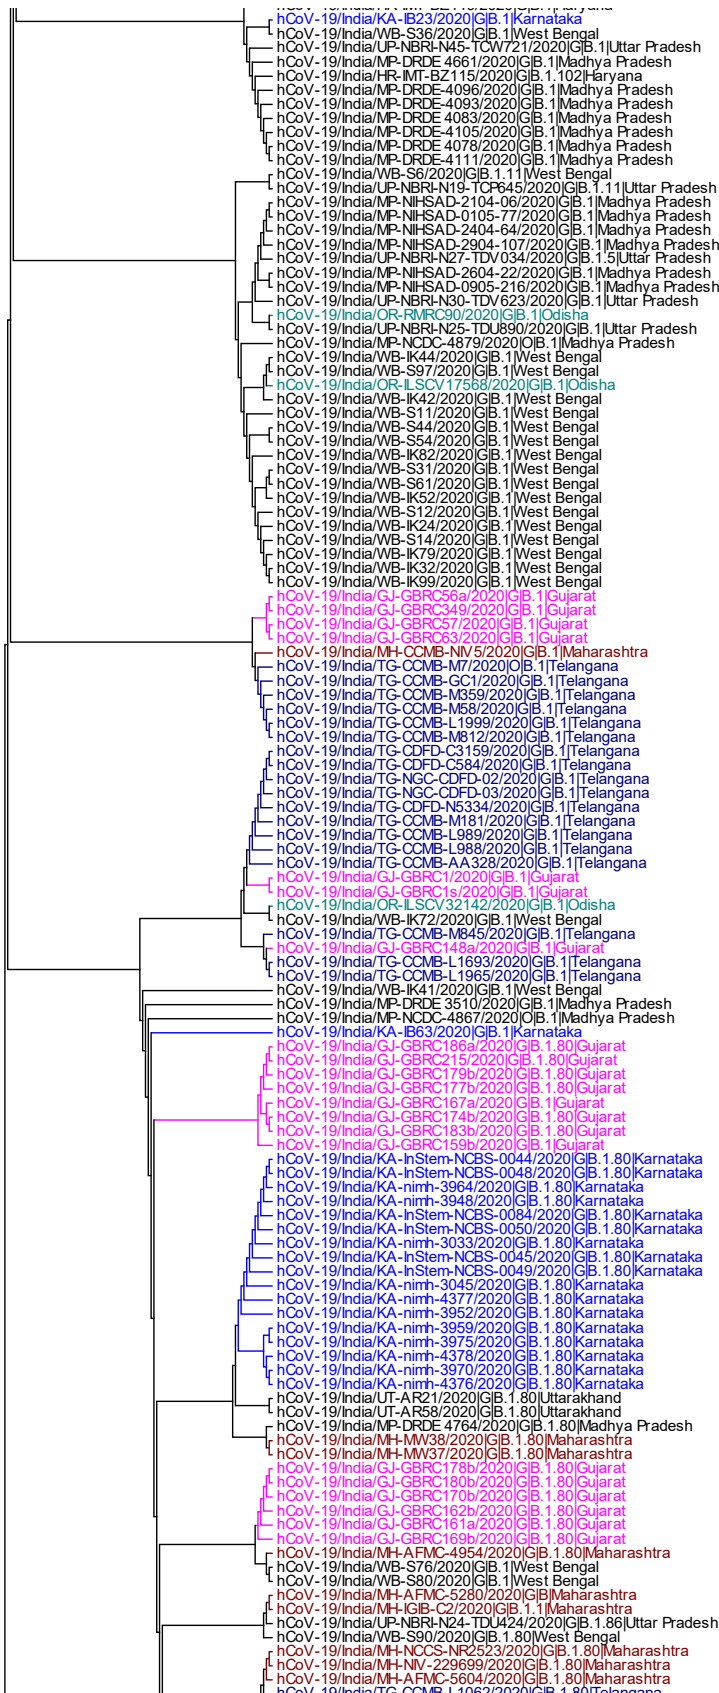



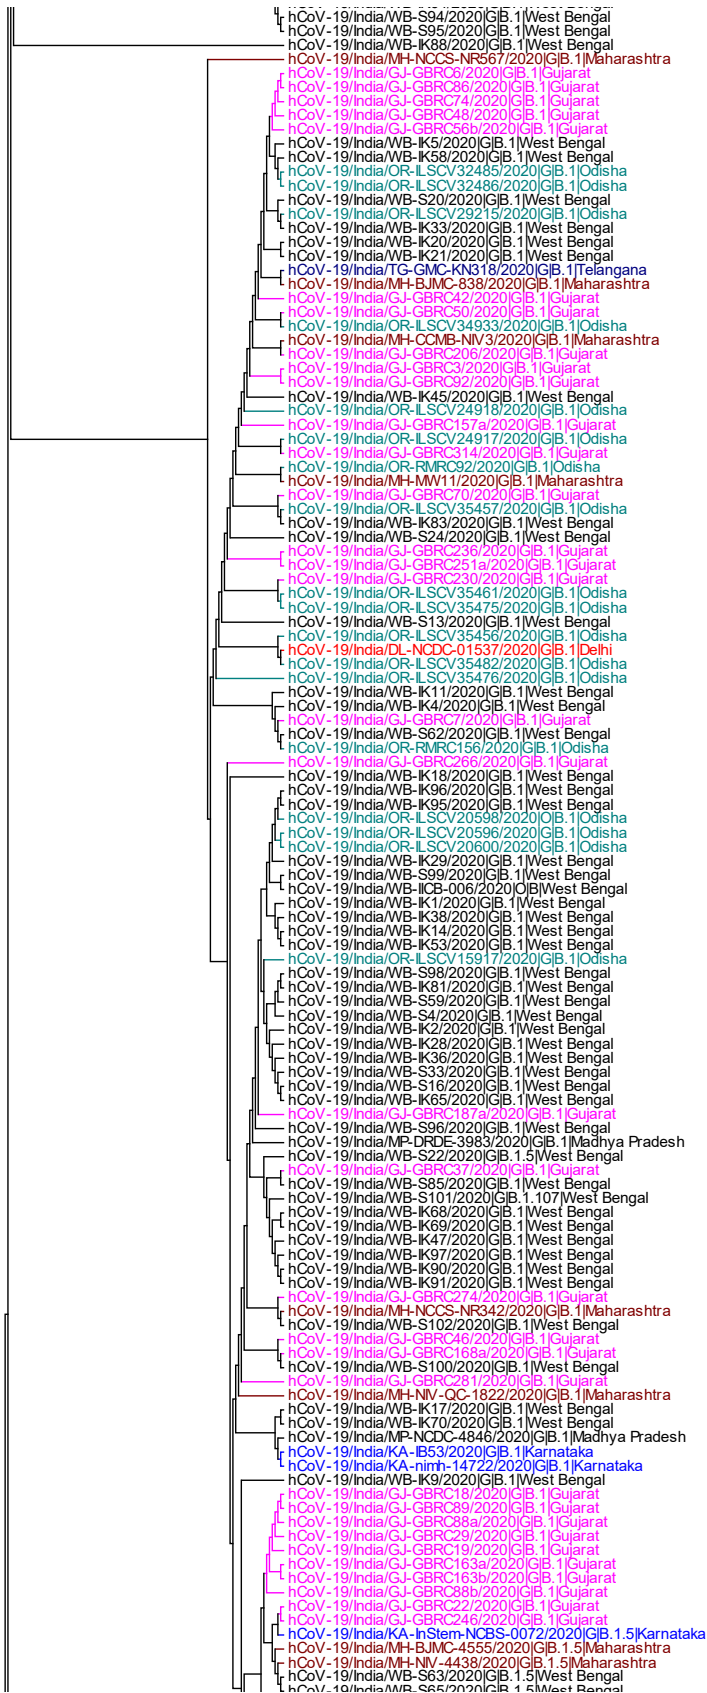

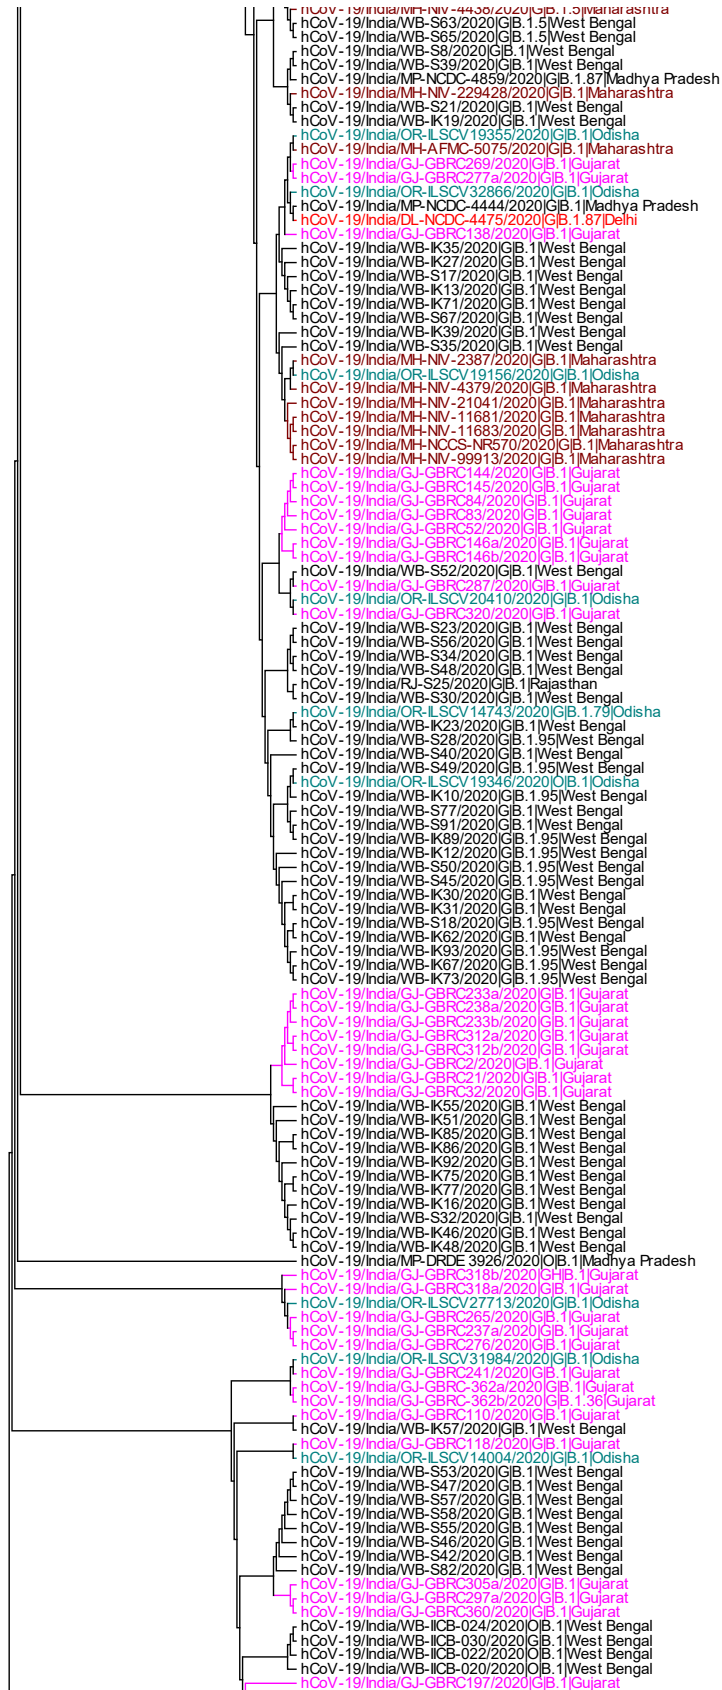

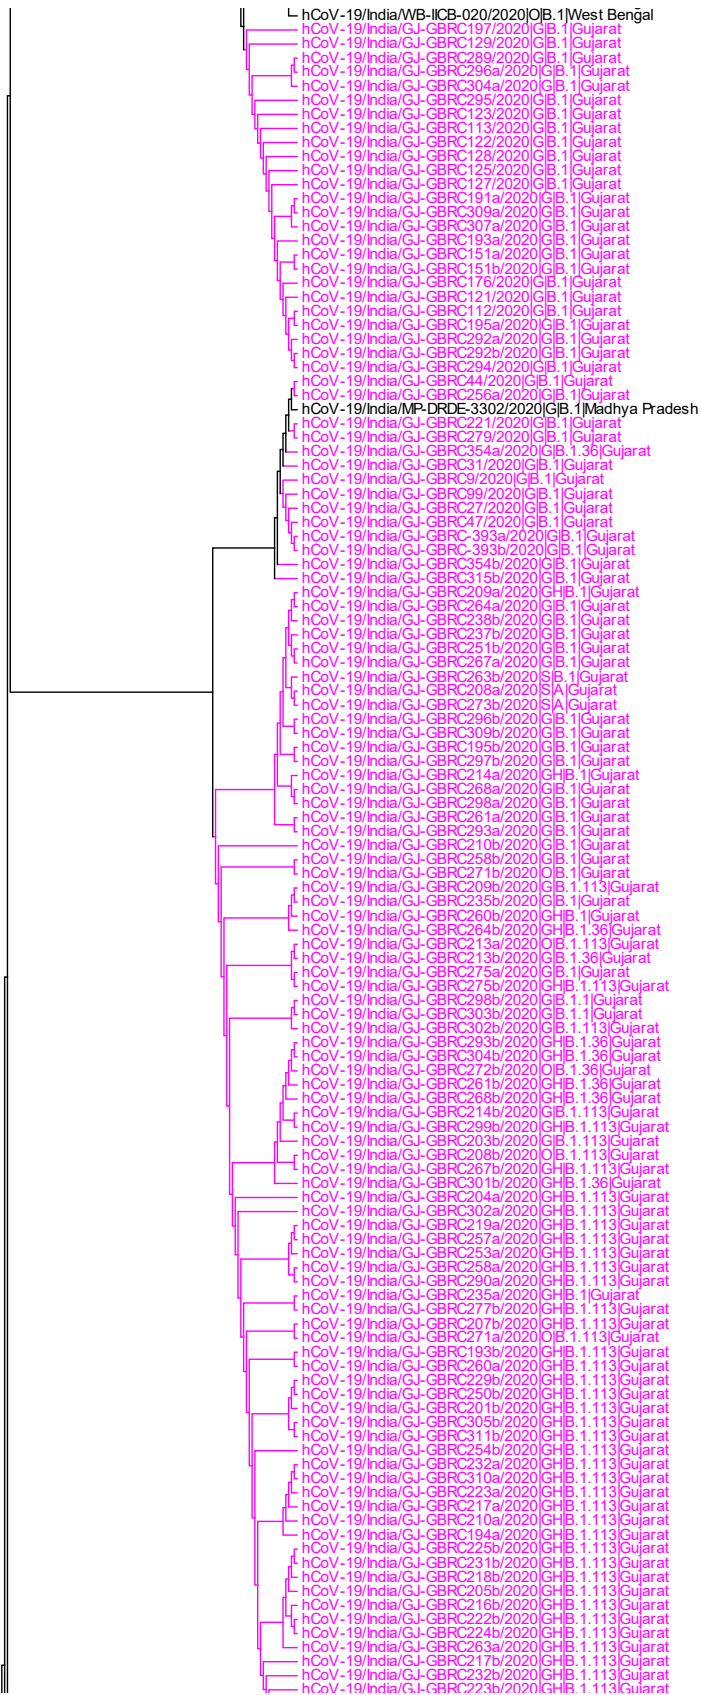

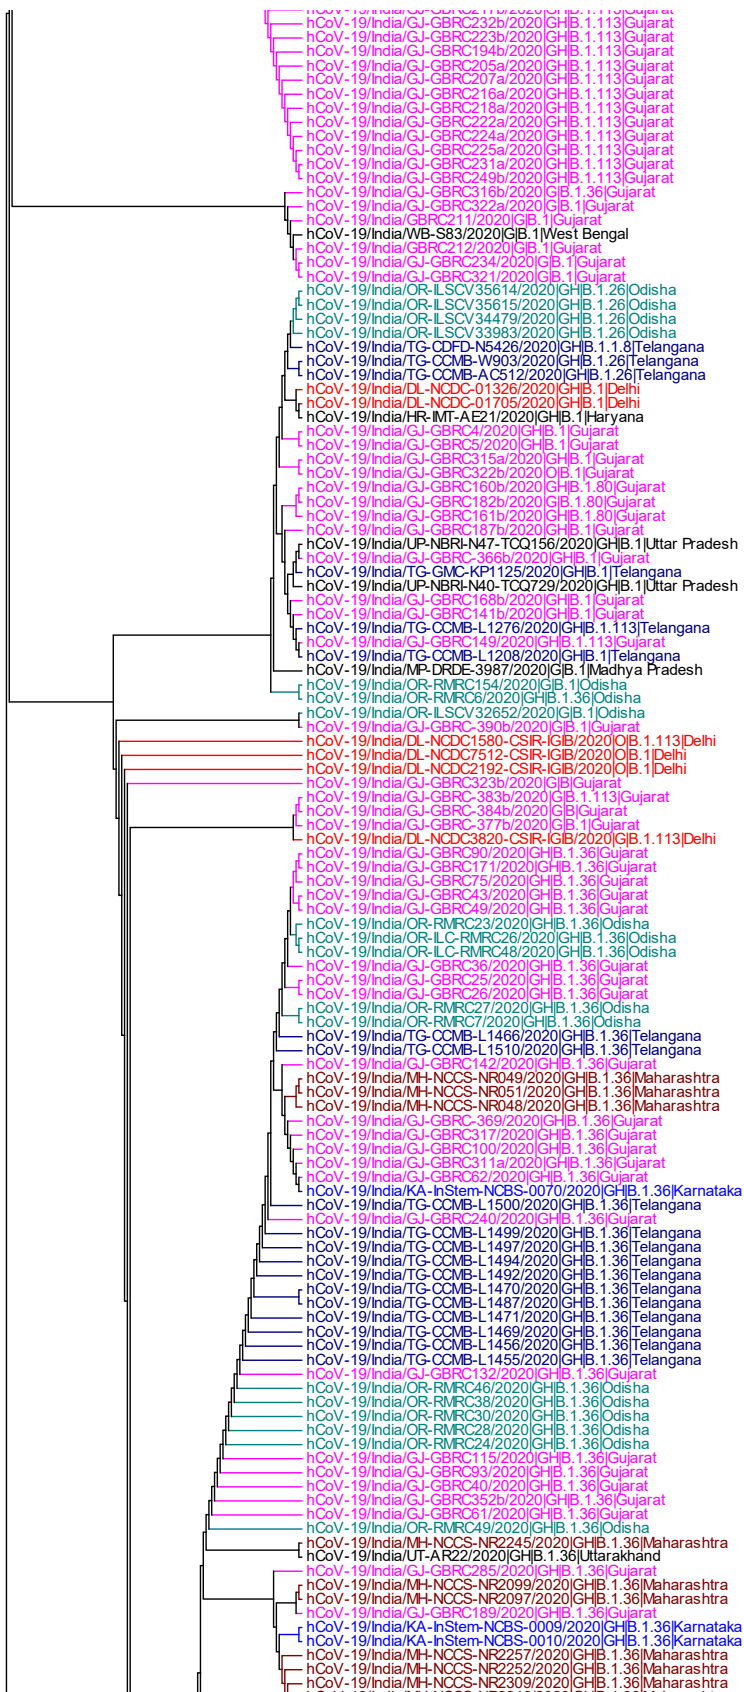



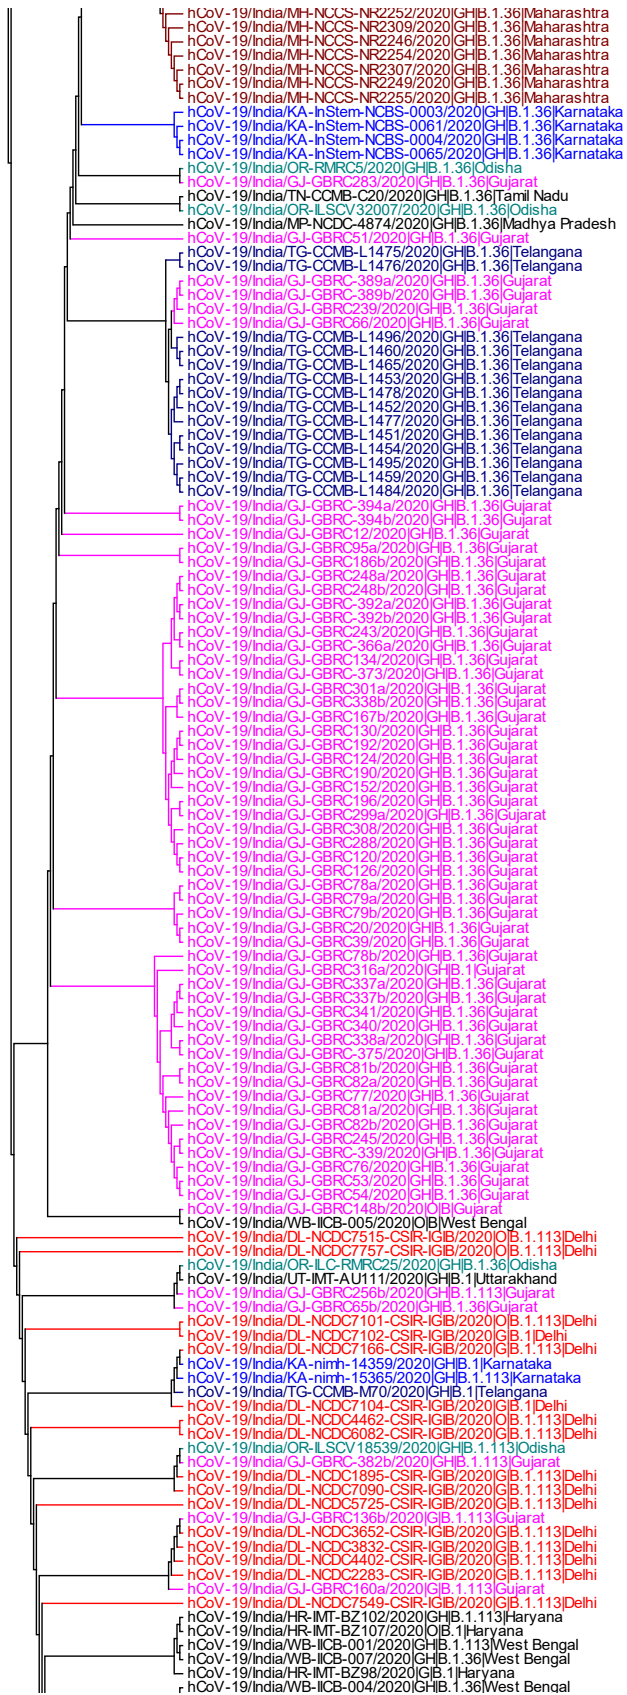

hCoV-19/India/HR-IMT-BZ98/2020|GIB.1.113|Haryana  
hCoV-19/India/WB-ICB-004/2020|GIB.1.36|West Bengal  
hCoV-19/India/WB-ICB-014/2020|GIB.1.36|West Bengal  
hCoV-19/India/WB-ICB-002/2020|GIB.1.36|West Bengal  
hCoV-19/India/HR-IMT-BZ16/2020|GIB.1.113|Haryana  
hCoV-19/India/HR-IMT-CB130/2020|GIB.1.36|Haryana  
hCoV-19/India/HR-IMT-BZ122/2020|GIB.1.113|Haryana  
hCoV-19/India/HR-IMT-CB17/2020|GIB.1.113|Haryana  
hCoV-19/India/DL-MNB/2020|GIB.1.113|Delhi  
hCoV-19/India/UP-NBRI-N55-TEH861/2020|GIB.1.113|Uttar Pradesh  
hCoV-19/India/UT-AR3/2020|GIB.1.113|Uttarakhand  
hCoV-19/India/HR-TF14/2020|GIB.1.113|Haryana  
hCoV-19/India/UP-NBRI-N54-TEH857/2020|GIB.1.113|Uttar Pradesh  
hCoV-19/India/UP-NBRI-N56-TEH862/2020|GIB.1.113|Uttar Pradesh  
hCoV-19/India/UT-AR29/2020|GIB.1.113|Uttarakhand  
hCoV-19/India/HR-TF13/2020|GIB.1.113|Haryana  
hCoV-19/India/HR-TF25/2020|GIB.1.113|Haryana  
hCoV-19/India/UT-AR6/2020|GIB.1.113|Uttarakhand  
hCoV-19/India/UT-AR59/2020|GIB.1.113|Uttarakhand  
hCoV-19/India/UT-AR13/2020|GIB.1.113|Uttarakhand  
hCoV-19/India/UT-AR14/2020|GIB.1.113|Uttarakhand  
hCoV-19/India/UP-AR20/2020|GIB.1.113|Uttar Pradesh  
hCoV-19/India/DL-MN1/2020|GIB.1.113|Delhi  
hCoV-19/India/HR-TF7/2020|GIB.1.113|Haryana  
hCoV-19/India/HR-TF41/2020|GIB.1.113|Haryana  
hCoV-19/India/UT-AR34/2020|GIB.1.113|Uttarakhand  
hCoV-19/India/DL-MN4/2020|GIB.1.113|Delhi  
hCoV-19/India/MH-NIV-QC-1444/2020|GIB.1.113|Maharashtra  
hCoV-19/India/MH-NIV-229912/2020|GIB.1.113|Maharashtra  
hCoV-19/India/UP-AR66/2020|GIB.1.113|Uttar Pradesh  
hCoV-19/India/UP-MN32/2020|GIB.1.113|Uttar Pradesh  
hCoV-19/India/HR-TF15/2020|GIB.1.113|Haryana  
hCoV-19/India/HR-TF2/2020|GIB.1.113|Haryana  
hCoV-19/India/HR-TF27/2020|GIB.1.113|Haryana  
hCoV-19/India/UT-AR53/2020|GIB.1.113|Uttarakhand  
hCoV-19/India/UT-IMT-AO15/2020|GIB.1.113|Uttarakhand  
hCoV-19/India/HR-TF19/2020|GIB.1.113|Haryana  
hCoV-19/India/UP-NBRI-N51-TEH465/2020|GIB.1.113|Uttar Pradesh  
hCoV-19/India/HR-TF17/2020|GIB.1.113|Haryana  
hCoV-19/India/MH-MW34/2020|GIB.1.113|Maharashtra  
hCoV-19/India/MH-MW32/2020|GIB.1.113|Maharashtra  
hCoV-19/India/MH-MW38/2020|GIB.1.113|Maharashtra  
hCoV-19/India/KA-InStem-NCBS-0036/2020|GIB.1.113|Karnataka  
hCoV-19/India/HR-TF26/2020|GIB.1.113|Haryana  
hCoV-19/India/UP-NBRI-N58-TEG811/2020|GIB.1.113|Uttar Pradesh  
hCoV-19/India/HR-TF4/2020|GIB.1.113|Haryana  
hCoV-19/India/HR-TF6/2020|GIB.1.113|Haryana  
hCoV-19/India/UT-AR28/2020|GIB.1.113|Uttarakhand  
hCoV-19/India/DL-NCDC-IGIB-77797A/2020|GIB.1.113|Delhi  
hCoV-19/India/DL-NCDC-IGIB-D1/2020|GIB.1.113|Delhi  
hCoV-19/India/DL-IGIB-77797/2020|GIB.1.113|Delhi  
hCoV-19/India/UT-IGIB-309/2020|GIB.1.113|Uttarakhand  
hCoV-19/India/HR-TF7/2020|GIB.1.113|Haryana  
hCoV-19/India/UP-NBRI-N48-TE094/2020|GIB.1.113|Uttar Pradesh  
hCoV-19/India/HR-TF21/2020|GIB.1.113|Haryana  
hCoV-19/India/UT-AR24/2020|GIB.1.113|Uttarakhand  
hCoV-19/India/UT-AR32/2020|GIB.1.113|Uttarakhand  
hCoV-19/India/HR-TF12/2020|GIB.1.113|Haryana  
hCoV-19/India/HR-TF30/2020|GIB.1.113|Haryana  
hCoV-19/India/MH-NIV-227243/2020|GIB.1.113|Maharashtra  
hCoV-19/India/KA-InStem-NCBS-0062/2020|GIB.1.113|Karnataka  
hCoV-19/India/UT-AR63/2020|GIB.1.113|Uttarakhand  
hCoV-19/India/UT-AR64/2020|GIB.1.113|Uttarakhand  
hCoV-19/India/UT-IMT-AN32/2020|GIB.1.113|Uttarakhand  
hCoV-19/India/TG-CCMB-M243/2020|GIB.1.113|Telangana  
hCoV-19/India/TG-CCMB-M79/2020|GIB.1.113|Telangana  
hCoV-19/India/DL-NCDC-01744/2020|GIB.1.113|Delhi  
hCoV-19/India/UP-NBRI-N52-TEH623/2020|GIB.1.113|Uttar Pradesh  
hCoV-19/India/KA-NIV-QC-1803/2020|GIB.1.113|Karnataka  
hCoV-19/India/GJ-GBRC137b/2020|GIB.1.113|Gujarat  
hCoV-19/India/TG-CCMB-M804/2020|GIB.1.113|Telangana  
hCoV-19/India/MH-NIV-197096/2020|GIB.1.113|Maharashtra  
hCoV-19/India/TG-CCMB-A C222/2020|GIB.1.113|Telangana  
hCoV-19/India/TG-CCMB-A B955/2020|GIB.1.113|Telangana  
hCoV-19/India/TG-CCMB-A C511/2020|GIB.1.113|Telangana  
hCoV-19/India/MH-NIV-207705/2020|GIB.1.113|Maharashtra  
hCoV-19/India/KA-NIV-QC-1801/2020|GIB.1.113|Karnataka  
hCoV-19/India/KA-InStem-NCBS-0038/2020|GIB.1.113|Karnataka  
hCoV-19/India/DL-NCDC-01757/2020|GIB.1.113|Delhi  
hCoV-19/India/DL-NCDC-01711/2020|GIB.1.113|Delhi  
hCoV-19/India/HR-IMT-BZ144/2020|GIB.1.113|Haryana  
hCoV-19/India/UT-IMT-B145/2020|GIB.1.113|Uttarakhand  
hCoV-19/India/UT-AR17/2020|GIB.1.113|Uttarakhand  
hCoV-19/India/UT-IMT-A T52/2020|GIB.1.113|Uttarakhand  
hCoV-19/India/DL-NCDC-01712/2020|GIB.1.113|Delhi  
hCoV-19/India/HR-TF20/2020|GIB.1.113|Haryana  
hCoV-19/India/HR-IMT-BZ140/2020|GIB.1.113|Haryana  
hCoV-19/India/HR-IMT-BZ124/2020|GIB.1.113|Haryana  
hCoV-19/India/DL-MN26/2020|GIB.1.113|Delhi  
hCoV-19/India/WB-S64/2020|GIB.1.113|West Bengal  
hCoV-19/India/UP-AR67/2020|GIB.1.113|Uttar Pradesh  
hCoV-19/India/HR-TF9/2020|GIB.1.113|Haryana  
hCoV-19/India/GJ-GBRC-368b/2020|GIB.1.113|Gujarat  
hCoV-19/India/GJ-GBRC95b/2020|GIB.1.113|Gujarat  
hCoV-19/India/GJ-GBRC182a/2020|GIB.1.113|Gujarat  
hCoV-19/India/GJ-GBRC181a/2020|GIB.1.113|Gujarat  
hCoV-19/India/GJ-GBRC324/2020|GIB.1.113|Gujarat  
hCoV-19/India/GJ-GBRC181b/2020|GIB.1.113|Gujarat  
hCoV-19/India/GJ-GBRC67a/2020|GIB.1.113|Gujarat  
hCoV-19/India/GJ-GBRC67b/2020|GIB.1.113|Gujarat  
hCoV-19/India/GJ-GBRC59/2020|GIB.1.113|Gujarat  
hCoV-19/India/GJ-GBRC350a/2020|GIB.1.113|Gujarat  
hCoV-19/India/GJ-GBRC350b/2020|GIB.1.113|Gujarat  
hCoV-19/India/GJ-GBRC156/2020|GIB.1.113|Gujarat  
hCoV-19/India/GJ-GBRC38/2020|GIB.1.113|Gujarat  
hCoV-19/India/GJ-GBRC85/2020|GIB.1.113|Gujarat  
hCoV-19/India/GJ-GBRC29/2020|GIB.1.113|Gujarat  
hCoV-19/India/GJ-GBRC345/2020|GIB.1.113|Gujarat  
hCoV-19/India/GJ-GBRC162a/2020|GIB.1.113|Gujarat  
hCoV-19/India/GJ-GBRC242/2020|GIB.1.113|Gujarat  
hCoV-19/India/MH-NCCS-NR2260/2020|GIB.1.113|Maharashtra  
hCoV-19/India/HR-IMT-CB29/2020|GIB.1.113|Haryana  
hCoV-19/India/HR-IMT-CB44/2020|GIB.1.113|Haryana  
hCoV-19/India/DL-NCDC-01475/2020|GIB.1.113|Delhi  
hCoV-19/India/DL-NCDC-01765-CSPH/2020|GIB.1.113|Delhi  
hCoV-19/India/HR-IMT-CB193/2020|GIB.1.113|Haryana  
hCoV-19/India/GJ-GBRC330/2020|GIB.1.113|Gujarat  
hCoV-19/India/GJ-GBRC352a/2020|GIB.1.113|Gujarat  
hCoV-19/India/KA-InStem-NCBS-0059/2020|GIB.1.113|Karnataka  
hCoV-19/India/KA-InStem-NCBS-0146/2020|GIB.1.113|Karnataka

hCoV-19/India/GJ-GBRC352a/2020|GHIB.1.113|Gujarat  
hCoV-19/India/KA-InStem-NCBS-0059/2020|GHIB.1.113|Karnataka  
hCoV-19/India/KA-IB46/2020|GHIB.1.113|Karnataka  
hCoV-19/India/KA-InStem-NCBS-0058/2020|GHIB.1.113|Karnataka  
hCoV-19/India/KA-InStem-NCBS-0055/2020|GHIB.1.113|Karnataka  
hCoV-19/India/KA-InStem-NCBS-0054/2020|GHIB.1.113|Karnataka  
hCoV-19/India/KA-InStem-NCBS-0056/2020|GHIB.1.113|Karnataka  
hCoV-19/India/KA-IB58/2020|GHIB.1.113|Karnataka  
hCoV-19/India/KA-InStem-NCBS-0060/2020|GHIB.1.113|Karnataka  
hCoV-19/India/DL-NCDC-IGIB-C1A/2020|GHIB.1.36|Delhi  
hCoV-19/India/GJ-GBRC183a/2020|GHIB.1.113|Gujarat  
hCoV-19/India/UT-IMT-BY60/2020|OJB.1.113|Uttarakhand  
hCoV-19/India/GJ-GBRC227/2020|GHIB.1.113|Gujarat  
hCoV-19/India/HR-IMT-BZ164/2020|GHIB.1.113|Haryana  
hCoV-19/India/GJ-GBRC361a/2020|GHIB.1.113|Gujarat  
hCoV-19/India/GJ-GBRC361b/2020|GHIB.1.113|Gujarat  
hCoV-19/India/GJ-GBRC166a/2020|GHIB.1.113|Gujarat  
hCoV-19/India/GJ-GBRC166b/2020|GHIB.1.113|Gujarat  
hCoV-19/India/GJ-GBRC228a/2020|GHIB.1.113|Gujarat  
hCoV-19/India/GJ-GBRC228b/2020|GHIB.1|Gujarat  
hCoV-19/India/GJ-GBRC177a/2020|GHIB.1.113|Gujarat  
hCoV-19/India/TG-CDFD-C1469/2020|GHIB.1.113|Telangana  
hCoV-19/India/GJ-GBRC179a/2020|GHIB.1.113|Gujarat  
hCoV-19/India/GJ-GBRC155/2020|GHIB.1.113|Gujarat  
hCoV-19/India/GJ-GBRC60/2020|GHIB.1.113|Gujarat  
hCoV-19/India/GJ-GBRC45/2020|GHIB.1.113|Gujarat  
hCoV-19/India/GJ-GBRC35/2020|GHIB.1.113|Gujarat  
hCoV-19/India/GJ-GBRC34/2020|GHIB.1.113|Gujarat  
hCoV-19/India/GJ-GBRC143/2020|GHIB.1.113|Gujarat  
hCoV-19/India/GJ-GBRC135a/2020|GHIB.1.113|Gujarat  
hCoV-19/India/GJ-GBRC135b/2020|GHIB.1.113|Gujarat  
hCoV-19/India/GJ-GBRC332a/2020|GHIB.1.113|Gujarat  
hCoV-19/India/GJ-GBRC332b/2020|GHIB.1.113|Gujarat  
hCoV-19/India/GJ-GBRC356/2020|GHIB.1.113|Gujarat  
hCoV-19/India/GJ-GBRC-381/2020|GHIB.1.113|Gujarat  
hCoV-19/India/GJ-GBRC-386a/2020|GHIB.1.113|Gujarat  
hCoV-19/India/GJ-GBRC-382a/2020|GHIB.1.113|Gujarat  
hCoV-19/India/GJ-GBRC-380a/2020|GHIB.1.113|Gujarat  
hCoV-19/India/GJ-GBRC-380b/2020|GHIB.1.113|Gujarat  
hCoV-19/India/GJ-GBRC-384a/2020|GHIB.1.113|Gujarat  
hCoV-19/India/GJ-GBRC-377a/2020|GHIB.1.113|Gujarat  
hCoV-19/India/GJ-GBRC-378/2020|GHIB.1.113|Gujarat  
hCoV-19/India/GJ-GBRC-388b/2020|GHIB.1.113|Gujarat  
hCoV-19/India/GJ-GBRC-371/2020|GHIB.1.113|Gujarat  
hCoV-19/India/GJ-GBRC-388/2020|GHIB.1.113|Gujarat  
hCoV-19/India/OR-ILSCV29962/2020|GHIB.1.113|Odisha  
hCoV-19/India/OR-ILSCV29960/2020|GHIB.1.113|Odisha  
hCoV-19/India/OR-ILSCV29959/2020|GHIB.1.113|Odisha  
hCoV-19/India/OR-ILSCV29961/2020|GHIB.1.113|Odisha  
hCoV-19/India/GJ-GBRC136a/2020|GHIB.1.113|Gujarat  
hCoV-19/India/GJ-GBRC128/2020|GHIB.1.113|Gujarat  
hCoV-19/India/GJ-GBRC-364a/2020|GHIB.1.113|Gujarat  
hCoV-19/India/GJ-GBRC-364b/2020|GHIB.1.113|Gujarat  
hCoV-19/India/GJ-GBRC184/2020|GHIB.1.113|Gujarat  
hCoV-19/India/GJ-GBRC232a/2020|GHIB.1.113|Gujarat  
hCoV-19/India/MH-NIV-229512/2020|GHIB.1.113|Maharashtra  
hCoV-19/India/GJ-GBRC87/2020|GHIB.1.113|Gujarat  
hCoV-19/India/GJ-GBRC8/2020|GHIB.1.113|Gujarat  
hCoV-19/India/GJ-GBRC72b/2020|GHIB.1.113|Gujarat  
hCoV-19/India/GJ-GBRC73/2020|GHIB.1.113|Gujarat  
hCoV-19/India/GJ-GBRC72a/2020|GHIB.1.113|Gujarat  
hCoV-19/India/GJ-GBRC336/2020|GHIB.1.113|Gujarat  
hCoV-19/India/GJ-GBRC300a/2020|GHIB.1.113|Gujarat  
hCoV-19/India/GJ-GBRC300b/2020|GHIB.1.113|Gujarat  
hCoV-19/India/GJ-GBRC351a/2020|GHIB.1.113|Gujarat  
hCoV-19/India/GJ-GBRC351b/2020|GHIB.1.113|Gujarat  
hCoV-19/India/GJ-GBRC-372/2020|GHIB.1.113|Gujarat  
hCoV-19/India/GJ-GBRC347a/2020|GHIB.1.113|Gujarat  
hCoV-19/India/GJ-GBRC347b/2020|GHIB.1.113|Gujarat  
hCoV-19/India/GJ-GBRC23/2020|GHIB.1.113|Gujarat  
hCoV-19/India/GJ-GBRC69/2020|GHIB.1.113|Gujarat  
hCoV-19/India/GJ-GBRC108/2020|GHIB.1.113|Gujarat  
hCoV-19/India/GJ-GBRC-363/2020|GHIB.1.113|Gujarat  
hCoV-19/India/GJ-GBRC141a/2020|GHIB.1.113|Gujarat  
hCoV-19/India/GJ-GBRC329/2020|GHIB.1.113|Gujarat  
hCoV-19/India/GJ-GBRC249a/2020|GHIB.1.113|Gujarat  
hCoV-19/India/GJ-GBRC326/2020|GHIB.1.113|Gujarat  
hCoV-19/India/GJ-GBRC359/2020|GHIB.1.113|Gujarat  
hCoV-19/India/GJ-GBRC-368a/2020|GHIB.1.113|Gujarat  
hCoV-19/India/GJ-GBRC-379/2020|GHIB.1.113|Gujarat  
hCoV-19/India/OR-ILSCV31447/2020|OJB.1.113|Odisha  
hCoV-19/India/GJ-GBRC58/2020|GHIB.1.113|Gujarat  
hCoV-19/India/GJ-GBRC357b/2020|GHIB.1.113|Gujarat  
hCoV-19/India/GJ-GBRC200/2020|GHIB.1.113|Gujarat  
hCoV-19/India/GJ-GBRC328/2020|GHIB.1.113|Gujarat  
hCoV-19/India/GJ-GBRC-367a/2020|GHIB.1.113|Gujarat  
hCoV-19/India/GJ-GBRC-367b/2020|GHIB.1.113|Gujarat  
hCoV-19/India/GJ-GBRC284b/2020|GHIB.1.113|Gujarat  
hCoV-19/India/GJ-GBRC150a/2020|GHIB.1.113|Gujarat  
hCoV-19/India/GJ-GBRC150b/2020|GHIB.1.113|Gujarat  
hCoV-19/India/GJ-GBRC284a/2020|GHIB.1.113|Gujarat  
hCoV-19/India/GJ-GBRC244/2020|GHIB.1.113|Gujarat  
hCoV-19/India/GJ-GBRC331/2020|GHIB.1.113|Gujarat  
hCoV-19/India/GJ-GBRC33/2020|GHIB.1.113|Gujarat  
hCoV-19/India/GJ-GBRC204b/2020|GHIB.1.113|Gujarat  
hCoV-19/India/GJ-GBRC219b/2020|GHIB.1.113|Gujarat  
hCoV-19/India/GJ-GBRC307b/2020|GHIB.1.113|Gujarat  
hCoV-19/India/GJ-GBRC252/2020|GHIB.1.113|Gujarat  
hCoV-19/India/GJ-GBRC253b/2020|GHIB.1.113|Gujarat  
hCoV-19/India/GJ-GBRC257b/2020|GHIB.1.113|Gujarat  
hCoV-19/India/GJ-GBRC348b/2020|GHIB.1.113|Gujarat  
hCoV-19/India/GJ-GBRC333/2020|GHIB.1.113|Gujarat  
hCoV-19/India/GJ-GBRC348a/2020|GHIB.1.113|Gujarat  
hCoV-19/India/GJ-GBRC55/2020|GHIB.1.113|Gujarat  
hCoV-19/India/GJ-GBRC68/2020|GHIB.1.113|Gujarat  
hCoV-19/India/GJ-GBRC247/2020|GHIB.1.113|Gujarat  
hCoV-19/India/GJ-GBRC-396/2020|GHIB.1.113|Gujarat  
hCoV-19/India/GJ-GBRC303a/2020|GHIB.1.113|Gujarat  
hCoV-19/India/GJ-GBRC310b/2020|GHIB.1.113|Gujarat  
hCoV-19/India/GJ-GBRC131/2020|GHIB.1.113|Gujarat  
hCoV-19/India/GJ-GBRC344/2020|GHIB.1.113|Gujarat  
hCoV-19/India/GJ-GBRC250a/2020|GHIB.1.113|Gujarat  
hCoV-19/India/GJ-GBRC306a/2020|GHIB.1.113|Gujarat  
hCoV-19/India/GJ-GBRC306b/2020|GHIB.1.113|Gujarat  
hCoV-19/India/GJ-GBRC117/2020|GHIB.1.113|Gujarat  
hCoV-19/India/GJ-GBRC343a/2020|GHIB.1.113|Gujarat  
hCoV-19/India/GJ-GBRC343b/2020|GHIB.1.113|Gujarat  
hCoV-19/India/GJ-GBRC140/2020|GHIB.1.113|Gujarat  
hCoV-19/India/GJ-GBRC-374a/2020|GHIB.1.113|Gujarat  
hCoV-19/India/GJ-GBRC-374b/2020|GHIB.1.113|Gujarat

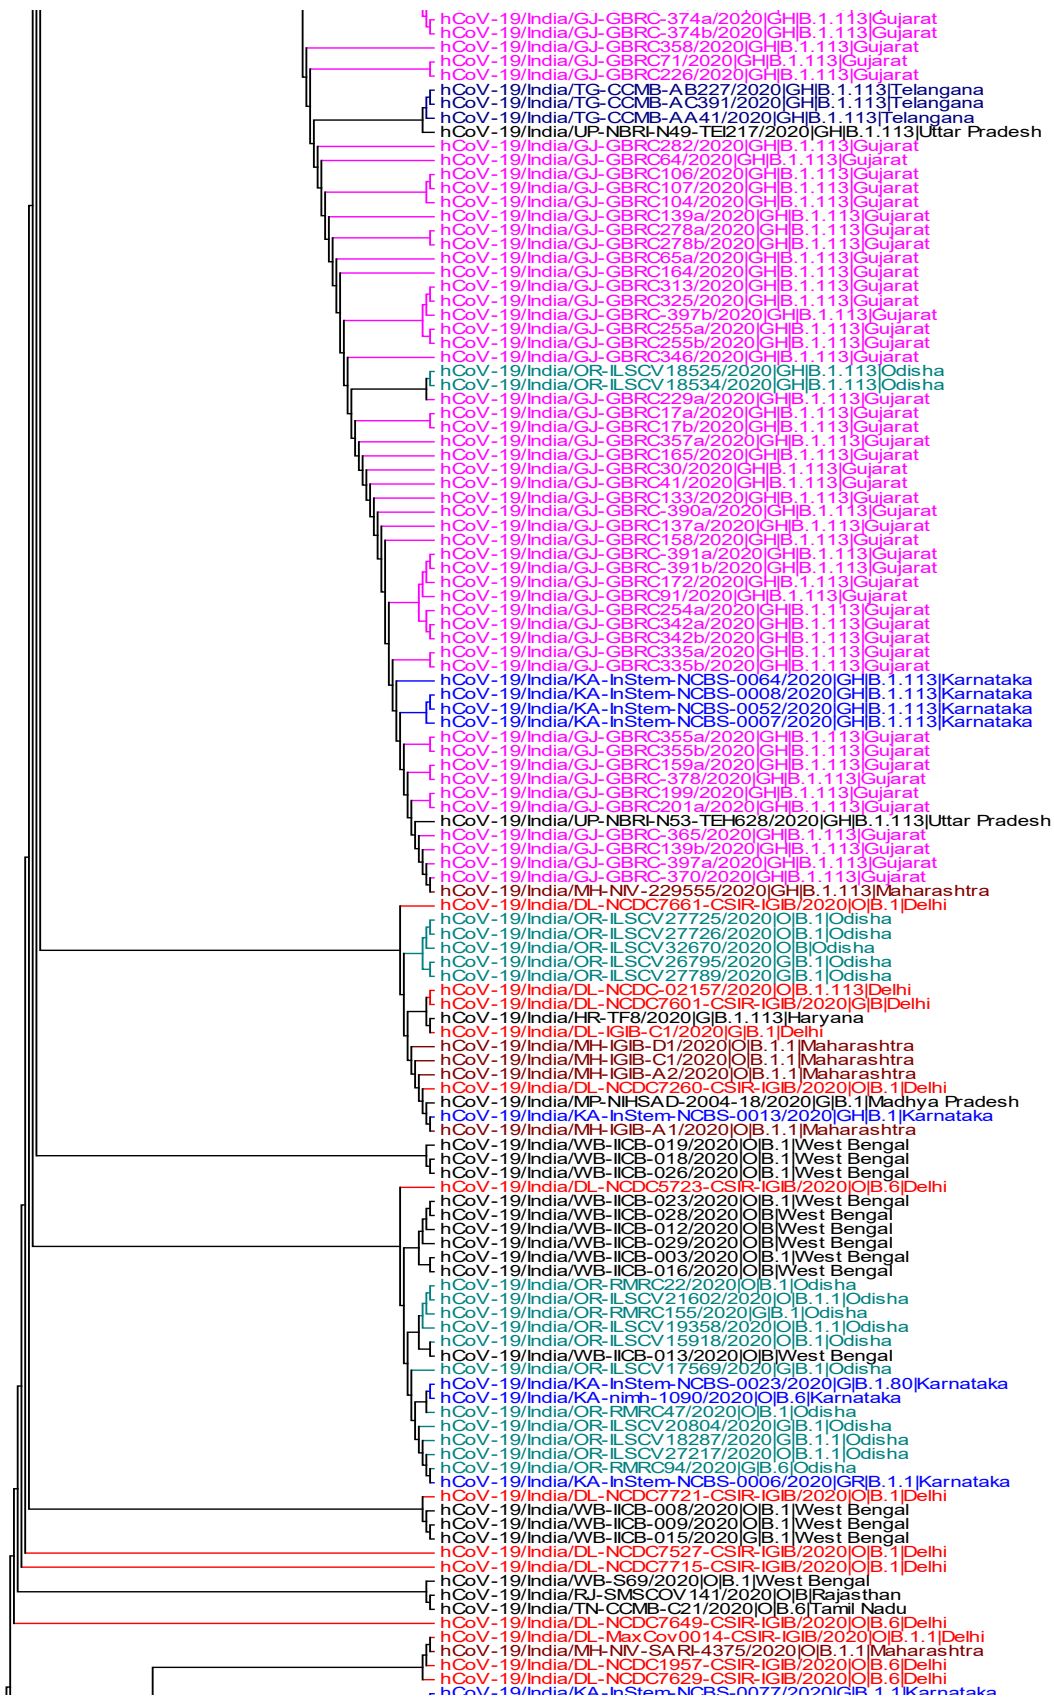

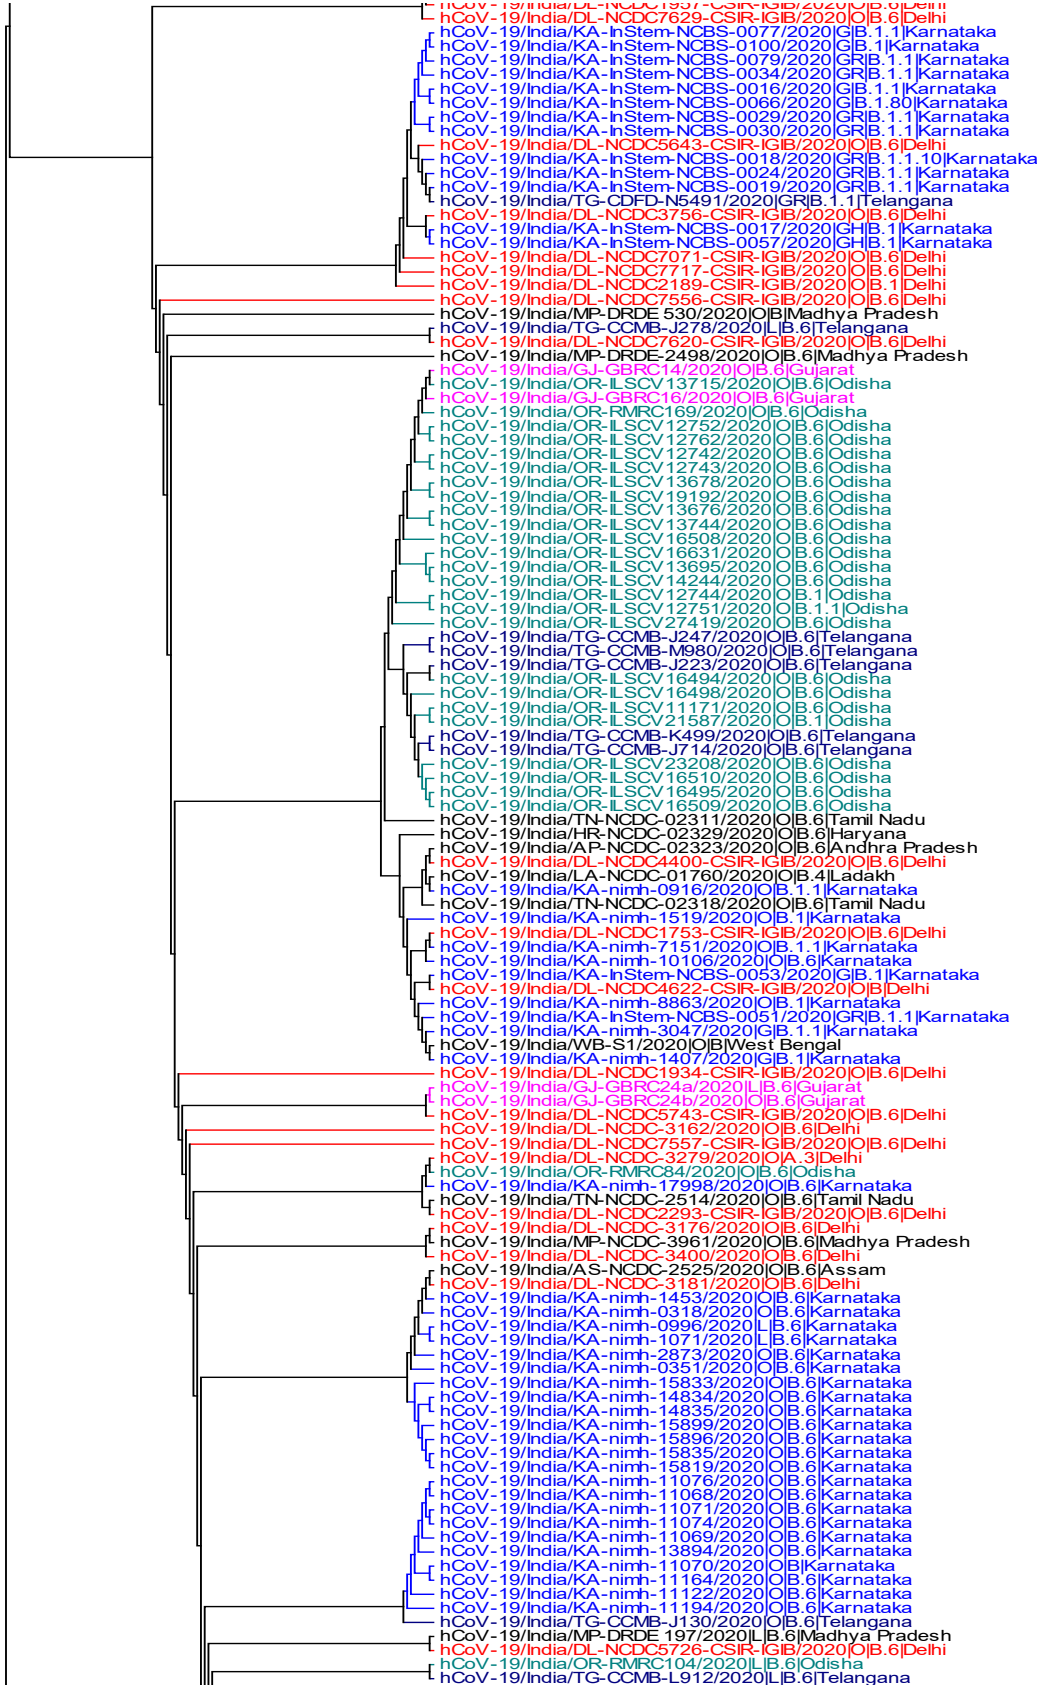

hCoV-19/India/OR-RMRC104/2020|IB.6|Odisha  
hCoV-19/India/TG-CCMB-L912/2020|IB.6|Telangana  
hCoV-19/India/MP-DRDE-2429/2020|IB.6|Madhya Pradesh  
hCoV-19/India/MP-DRDE-2497/2020|IB.6|Madhya Pradesh  
hCoV-19/India/MP-DRDE-1794/2020|IB.6|Madhya Pradesh  
hCoV-19/India/DL-NCDC1520-CSIR-IGIB/2020|IB.6|Delhi  
hCoV-19/India/DL-NCDC1542-CSIR-IGIB/2020|IB.6|Delhi  
hCoV-19/India/DL-NCDC6086-CSIR-IGIB/2020|IB.6|Delhi  
hCoV-19/India/DL-NCDC2338-CSIR-IGIB/2020|IB.6|Delhi  
hCoV-19/India/DL-NCDC7760-CSIR-IGIB/2020|IB.6|Delhi  
hCoV-19/India/DL-NCDC1558-CSIR-IGIB/2020|IB.6|Delhi  
hCoV-19/India/DL-NCDC1555-CSIR-IGIB/2020|IB.6|Delhi  
hCoV-19/India/DL-NCDC1997-CSIR-IGIB/2020|IB.6|Delhi  
hCoV-19/India/DL-NCDC2051-CSIR-IGIB/2020|IB.6|Delhi  
hCoV-19/India/DL-NCDC1993-CSIR-IGIB/2020|IB.6|Delhi  
hCoV-19/India/DL-NCDC7531-CSIR-IGIB/2020|IB.6|Delhi  
hCoV-19/India/DL-NCDC4473-CSIR-IGIB/2020|IB.6|Delhi  
hCoV-19/India/TG-CDFD-N69/2020|IB.6|Telangana  
hCoV-19/India/DL-NCDC7572-CSIR-IGIB/2020|IB.6|Delhi  
hCoV-19/India/DL-NCDC7695-CSIR-IGIB/2020|IB.6|Delhi  
hCoV-19/India/DL-NCDC1756-CSIR-IGIB/2020|IB.6|Delhi  
hCoV-19/India/DL-NCDC2045-CSIR-IGIB/2020|IB.6|Delhi  
hCoV-19/India/DL-NCDC4593-CSIR-IGIB/2020|IB.6|Delhi  
hCoV-19/India/MH-NCDC-02330/2020|IB.6|Maharashtra  
hCoV-19/India/OR-ILSCV19342/2020|IB.1|Odisha  
hCoV-19/India/DL-NCDC2301-CSIR-IGIB/2020|IB.6|Delhi  
hCoV-19/India/DL-NCDC2078-CSIR-IGIB/2020|IB.6|Delhi  
hCoV-19/India/DL-NCDC24625-CSIR-IGIB/2020|IB.6|Delhi  
hCoV-19/India/DL-NCDC4596-CSIR-IGIB/2020|IB.6|Delhi  
hCoV-19/India/DL-NCDC1954-CSIR-IGIB/2020|IB.6|Delhi  
hCoV-19/India/DL-NCDC4398-CSIR-IGIB/2020|IB.6|Delhi  
hCoV-19/India/DL-NCDC2002-CSIR-IGIB/2020|IB.6|Delhi  
hCoV-19/India/DL-NCDC3788-CSIR-IGIB/2020|IB.6|Delhi  
hCoV-19/India/DL-NCDC2004-CSIR-IGIB/2020|IB.6|Delhi  
hCoV-19/India/DL-NCDC4588-CSIR-IGIB/2020|IB.6|Delhi  
hCoV-19/India/DL-NCDC2066-CSIR-IGIB/2020|IB.6|Delhi  
hCoV-19/India/DL-NCDC3737-CSIR-IGIB/2020|IB.6|Delhi  
hCoV-19/India/DL-NCDC1768-CSIR-IGIB/2020|IB.6|Delhi  
hCoV-19/India/DL-NCDC7083-CSIR-IGIB/2020|IB.6|Delhi  
hCoV-19/India/DL-NCDC2001-CSIR-IGIB/2020|IB.6|Delhi  
hCoV-19/India/DL-NCDC7039-CSIR-IGIB/2020|IB.6|Delhi  
hCoV-19/India/DL-NCDC1727-CSIR-IGIB/2020|IB.6|Delhi  
hCoV-19/India/DL-NCDC2024-CSIR-IGIB/2020|IB.6|Delhi  
hCoV-19/India/DL-NCDC2343-CSIR-IGIB/2020|IB.6|Delhi  
hCoV-19/India/DL-NCDC3766-CSIR-IGIB/2020|IB.6|Delhi  
hCoV-19/India/DL-NCDC7532-CSIR-IGIB/2020|IB.6|Delhi  
hCoV-19/India/DL-NCDC2067-CSIR-IGIB/2020|IB.6|Delhi  
hCoV-19/India/DL-NCDC5717-CSIR-IGIB/2020|IB.6|Delhi  
hCoV-19/India/DL-NCDC1613-CSIR-IGIB/2020|IB.6|Delhi  
hCoV-19/India/DL-NCDC2203-CSIR-IGIB/2020|IB.6|Delhi  
hCoV-19/India/DL-NCDC2216-CSIR-IGIB/2020|IB.6|Delhi  
hCoV-19/India/DL-NCDC2202-CSIR-IGIB/2020|IB.6|Delhi  
hCoV-19/India/DL-NCDC1834-CSIR-IGIB/2020|IB.6|Delhi  
hCoV-19/India/DL-NCDC2188-CSIR-IGIB/2020|IB.6|Delhi  
hCoV-19/India/DL-NCDC2130-CSIR-IGIB/2020|IB.6|Delhi  
hCoV-19/India/DL-NCDC2214-CSIR-IGIB/2020|IB.6|Delhi  
hCoV-19/India/DL-NCDC2020-CSIR-IGIB/2020|IB.6|Delhi  
hCoV-19/India/DL-NCDC2019-CSIR-IGIB/2020|IB.6|Delhi  
hCoV-19/India/DL-NCDC3803-CSIR-IGIB/2020|IB.6|Delhi  
hCoV-19/India/DL-NCDC1969-CSIR-IGIB/2020|IB.6|Delhi  
hCoV-19/India/DL-NCDC7077-CSIR-IGIB/2020|IB.6|Delhi  
hCoV-19/India/DL-NCDC7032-CSIR-IGIB/2020|IB.6|Delhi  
hCoV-19/India/DL-NCDC7735-CSIR-IGIB/2020|IB.6|Delhi  
hCoV-19/India/DL-NCDC2038-CSIR-IGIB/2020|IB.6|Delhi  
hCoV-19/India/DL-NCDC2059-CSIR-IGIB/2020|IB.6|Delhi  
hCoV-19/India/DL-NCDC2043-CSIR-IGIB/2020|IB.6|Delhi  
hCoV-19/India/DL-NCDC7560-CSIR-IGIB/2020|IB.6|Delhi  
hCoV-19/India/DL-NCDC1605-CSIR-IGIB/2020|IB.6|Delhi  
hCoV-19/India/DL-NCDC4590-CSIR-IGIB/2020|IB.6|Delhi  
hCoV-19/India/DL-NCDC1733-CSIR-IGIB/2020|IB.6|Delhi  
hCoV-19/India/DL-NCDC7604-CSIR-IGIB/2020|IB.6|Delhi  
hCoV-19/India/DL-NCDC2334-CSIR-IGIB/2020|IB.6|Delhi  
hCoV-19/India/DL-NCDC7749-CSIR-IGIB/2020|IB.6|Delhi  
hCoV-19/India/BR-NCDC-3941/2020|IB.6|Bihar  
hCoV-19/India/DL-NCDC1514-CSIR-IGIB/2020|IB.6|Delhi  
hCoV-19/India/PB-IMT-18/2020|IB.6|Punjab  
hCoV-19/India/PB-IMT-L179/2020|IB.6|Punjab  
hCoV-19/India/DL-NCDC7095/2020|IB.6|Delhi  
hCoV-19/India/DL-NCDC2097-CSIR-IGIB/2020|IB.6|Delhi  
hCoV-19/India/DL-NCDC7686-CSIR-IGIB/2020|IB.6|Delhi  
hCoV-19/India/DL-NCDC4592-CSIR-IGIB/2020|IB.6|Delhi  
hCoV-19/India/DL-NCDC7647-CSIR-IGIB/2020|IB.6|Delhi  
hCoV-19/India/DL-NCDC1873-CSIR-IGIB/2020|IB.6|Delhi  
hCoV-19/India/DL-NCDC2330-CSIR-IGIB/2020|IB.6|Delhi  
hCoV-19/India/DL-NCDC2198-CSIR-IGIB/2020|IB.6|Delhi  
hCoV-19/India/MH-NCDC-3985/2020|IB.6|Maharashtra  
hCoV-19/India/DL-NCDC7641-CSIR-IGIB/2020|IB.6|Delhi  
hCoV-19/India/TG-CCMB-J014/2020|IB.6|Telangana  
hCoV-19/India/DL-NCDC-3982/2020|IB.6|Delhi  
hCoV-19/India/MH-NIV-6285/2020|IB.6|Maharashtra  
hCoV-19/India/MH-NIV-8404/2020|IB.6|Maharashtra  
hCoV-19/India/WB-NCDC-02248/2020|IB.6|West Bengal  
hCoV-19/India/MH-NCDC-02315/2020|IB.6|Maharashtra  
hCoV-19/India/MH-NCDC-02310/2020|IB.6|Maharashtra  
hCoV-19/India/TN-NCDC-02309/2020|IB.6|Tamil Nadu  
hCoV-19/India/DL-NCDC-3394/2020|IB.6|Delhi  
hCoV-19/India/MH-NIV-7098/2020|IB.6|Maharashtra  
hCoV-19/India/DL-MaxCov0019-CSIR-IGIB/2020|IB.6|Delhi  
hCoV-19/India/DL-NCDC-3190/2020|IB.6|Delhi  
hCoV-19/India/HR-THSTI-BAL-39/2020|IB.6|Haryana  
hCoV-19/India/HR-THSTI-BAL-42/2020|IB.6|Haryana  
hCoV-19/India/HR-THSTI-BAL-41/2020|IB.6|Haryana  
hCoV-19/India/HR-THSTI-BAL-47/2020|IB.6|Haryana  
hCoV-19/India/DL-MaxCov0024-CSIR-IGIB/2020|IB.6|Delhi  
hCoV-19/India/DL-NCDC7645-CSIR-IGIB/2020|IB.6|Delhi  
hCoV-19/India/TN-NCDC-02334/2020|IB.6|Tamil Nadu  
hCoV-19/India/TN-NCDC-02242/2020|IB.6|Tamil Nadu  
hCoV-19/India/GJ-GBRC103/2020|IB.6|Gujarat  
hCoV-19/India/MH-NIV-QC-798/2020|IB.6|Maharashtra  
hCoV-19/India/TG-CCMB-J233/2020|IB.6|Telangana  
hCoV-19/India/TG-CCMB-J048/2020|IB.6|Telangana  
hCoV-19/India/MH-MV5/2020|IB.6|Maharashtra  
hCoV-19/India/TG-CCMB-J222/2020|IB.6|Telangana  
hCoV-19/India/KA-nimh-7817/2020|IB.6|Karnataka  
hCoV-19/India/KA-nimh-3720/2020|IB.6|Karnataka  
hCoV-19/India/KA-nimh-5297/2020|IB.6|Karnataka  
hCoV-19/India/UP-NBRI-N23-TDU543/2020|IB.6|Uttar Pradesh  
hCoV-19/India/UP-NBRI-N43-TCX120/2020|IB.6|Uttar Pradesh  
hCoV-19/India/DL-NCDC2058-CSIR-IGIB/2020|IB.6|Delhi  
hCoV-19/India/DL-NCDC5641-CSIR-IGIB/2020|IB.6|Delhi

hCoV-19/India/DL-NCDC2058-CSIR-IGIB/2020/OIB.6|Delhi  
hCoV-19/India/DL-NCDC5641-CSIR-IGIB/2020/OIB.6|Delhi  
hCoV-19/India/OR-NCDC-02336/2020/OIB.6|Odisha  
hCoV-19/India/UP-NBRI-N32-TCX152/2020/OIB.6|Uttar Pradesh  
hCoV-19/India/DL-MaxCov0036-CSIR-IGIB/2020/OIB.6|Delhi  
hCoV-19/India/UP-NBRI-N42-TCX099/2020/OIB.6|Uttar Pradesh  
hCoV-19/India/OR-LSCV15907/2020/OIB.6|Odisha  
hCoV-19/India/OR-LSCV15937/2020/OIB.6|Odisha  
hCoV-19/India/DL-NCDC-3831/2020/OIB.6|Delhi  
hCoV-19/India/MH-NCDC-3950/2020/OIB.6|Maharashtra  
hCoV-19/India/MH-NCDC-3965/2020/OIB.6|Maharashtra  
hCoV-19/India/KA-InStem-NCBS-0047/2020/OIB.6|Karnataka  
hCoV-19/India/UP-NBRI-N41-TCX029/2020/OIB.6|Uttar Pradesh  
hCoV-19/India/DL-MaxCov0045-CSIR-IGIB/2020/OIB.6|Delhi  
hCoV-19/India/DL-NCDC2022-CSIR-IGIB/2020/OIB.6|Delhi  
hCoV-19/India/DL-MaxCov0048-CSIR-IGIB/2020/OIB.6|Delhi  
hCoV-19/India/DL-NCDC4586-CSIR-IGIB/2020/OIB.6|Delhi  
hCoV-19/India/DL-MaxCov0044-CSIR-IGIB/2020/OIB.6|Delhi  
hCoV-19/India/DL-MaxCov0049-CSIR-IGIB/2020/OIB.6|Delhi  
hCoV-19/India/DL-MaxCov0050-CSIR-IGIB/2020/OIB.6|Delhi  
hCoV-19/India/DL-NCDC4619-CSIR-IGIB/2020/OIB.6|Delhi  
hCoV-19/India/DL-NCDC7573-CSIR-IGIB/2020/OIB.6|Delhi  
hCoV-19/India/DL-NCDC2068-CSIR-IGIB/2020/OIB.6|Delhi  
hCoV-19/India/UP-NBRI-N31-TCX154/2020/OIB.6|Uttar Pradesh  
hCoV-19/India/DL-NCDC5642-CSIR-IGIB/2020/OIB.6|Delhi  
hCoV-19/India/DL-NCDC3721-CSIR-IGIB/2020/OIB.6|Delhi  
hCoV-19/India/TG-CCDF-N1153/2020/OIB.6|Telangana  
hCoV-19/India/HR-THSTI-BAL-360/2020/OIB.6|Haryana  
hCoV-19/India/DL-MaxCov0026-CSIR-IGIB/2020/OIB.6|Delhi  
hCoV-19/India/DL-MaxCov0029-CSIR-IGIB/2020/OIB.6|Delhi  
hCoV-19/India/UP-NBRI-N36-TDV771/2020/OIB.6|Uttar Pradesh  
hCoV-19/India/DL-MaxCov0042-CSIR-IGIB/2020/OIB.6|Delhi  
hCoV-19/India/DL-MaxCov0037-CSIR-IGIB/2020/OIB.6|Delhi  
hCoV-19/India/UP-NBRI-N33-TCX148/2020/OIB.6|Uttar Pradesh  
hCoV-19/India/DL-NCDC2305-CSIR-IGIB/2020/OIB.6|Delhi  
hCoV-19/India/DL-NCDC-3195/2020/OIB.6|Delhi  
hCoV-19/India/DL-MaxCov0028-CSIR-IGIB/2020/OIB.6|Delhi  
hCoV-19/India/DL-NCDC1892-CSIR-IGIB/2020/OIB.6|Delhi  
hCoV-19/India/DL-MaxCov0023-CSIR-IGIB/2020/OIB.6|Delhi  
hCoV-19/India/DL-NCDC3744-CSIR-IGIB/2020/OIB.6|Delhi  
hCoV-19/India/DL-MaxCov0043-CSIR-IGIB/2020/OIB.6|Delhi  
hCoV-19/India/DL-NCDC7716-CSIR-IGIB/2020/OIB.6|Delhi  
hCoV-19/India/UP-NBRI-N18-TDU012/2020/OIB.6|Uttar Pradesh  
hCoV-19/India/DL-NCDC1559-CSIR-IGIB/2020/OIB.6|Delhi  
hCoV-19/India/UP-NBRI-N50-TE229/2020/OIB.6|Uttar Pradesh  
hCoV-19/India/DL-NCDC3697-CSIR-IGIB/2020/OIB.6|Delhi  
hCoV-19/India/BR-NCDC-02251/2020/OIB.6|Bihar  
hCoV-19/India/DL-MaxCov0035-CSIR-IGIB/2020/OIB.6|Delhi  
hCoV-19/India/DL-NCDC2032-CSIR-IGIB/2020/OIB.6|Delhi  
hCoV-19/India/BR-NCDC-3934/2020/OIB.6|Bihar  
hCoV-19/India/DL-NCDC1769-CSIR-IGIB/2020/OIB.6|Delhi  
hCoV-19/India/DL-NCDC7084-CSIR-IGIB/2020/OIB.6|Delhi  
hCoV-19/India/DL-NCDC5640-CSIR-IGIB/2020/OIB.6|Delhi  
hCoV-19/India/DL-NCDC3743-CSIR-IGIB/2020/OIB.6|Delhi  
hCoV-19/India/DL-NCDC3680-CSIR-IGIB/2020/OIB.6|Delhi  
hCoV-19/India/DL-NCDC5719-CSIR-IGIB/2020/OIB.6|Delhi  
hCoV-19/India/DL-NCDC7067-CSIR-IGIB/2020/OIB.6|Delhi  
hCoV-19/India/DL-NCDC7666-CSIR-IGIB/2020/OIB.6|Delhi  
hCoV-19/India/DL-NCDC5718-CSIR-IGIB/2020/OIB.6|Delhi  
hCoV-19/India/DL-MaxCov0027-CSIR-IGIB/2020/OIB.6|Delhi  
hCoV-19/India/DL-MaxCov0039-CSIR-IGIB/2020/OIB.6|Delhi  
hCoV-19/India/DL-NCDC4764-CSIR-IGIB/2020/OIB.6|Delhi  
hCoV-19/India/DL-NCDC4627-CSIR-IGIB/2020/OIB.6|Delhi  
hCoV-19/India/DL-NCDC2007-CSIR-IGIB/2020/OIB.6|Delhi  
hCoV-19/India/DL-NCDC6079-CSIR-IGIB/2020/OIB.6|Delhi  
hCoV-19/India/DL-MaxCov0046-CSIR-IGIB/2020/OIB.6|Delhi  
hCoV-19/India/DL-MaxCov0034-CSIR-IGIB/2020/OIB.6|Delhi  
hCoV-19/India/DL-MaxCov0047-CSIR-IGIB/2020/OIB.6|Delhi  
hCoV-19/India/DL-NCDC1995-CSIR-IGIB/2020/OIB.6|Delhi  
hCoV-19/India/DL-NCDC7516-CSIR-IGIB/2020/OIB.6|Delhi  
hCoV-19/India/DL-NCDC1962-CSIR-IGIB/2020/OIB.6|Delhi  
hCoV-19/India/DL-NCDC1962-CSIR-IGIB/2020/OIB.6|Delhi  
hCoV-19/India/DL-NCDC6085-CSIR-IGIB/2020/OIB.6|Delhi  
hCoV-19/India/TN-CCMB-C2-13/2020/OIB.6|Tamil Nadu  
hCoV-19/India/TN-CCMB-C3-14/2020/OIB.6|Tamil Nadu  
hCoV-19/India/TN-CCMB-C1-12/2020/OIB.6|Tamil Nadu  
hCoV-19/India/DL-NCDC1964-CSIR-IGIB/2020/OIB.6|Delhi  
hCoV-19/India/DL-MaxCov0021-CSIR-IGIB/2020/OIB.6|Delhi  
hCoV-19/India/MIH-NCDC-3835/2020/OIB.6|Maharashtra  
hCoV-19/India/DL-NCDC2017-CSIR-IGIB/2020/OIB.6|Delhi  
hCoV-19/India/DL-NCDC7733-CSIR-IGIB/2020/OIB.6|Delhi  
hCoV-19/India/KA-nimh-1596/2020/OIB.6|Karnataka  
hCoV-19/India/KA-nimh-1598/2020/OIB.6|Karnataka  
hCoV-19/India/KA-nimh-1600/2020/OIB.6|Karnataka  
hCoV-19/India/KA-nimh-12171/2020/OIB.6|Karnataka  
hCoV-19/India/KA-nimh-0999/2020/OIB.6|Karnataka  
hCoV-19/India/UP-NCDC-02322/2020/OIB.6|Uttar Pradesh  
hCoV-19/India/KA-nimh-5102/2020/OIB.6|Karnataka  
hCoV-19/India/KA-nimh-7139/2020/OIB.6|Karnataka  
hCoV-19/India/KA-nimh-1114/2020/OIB.6|Karnataka  
hCoV-19/India/DL-NCDC2200-CSIR-IGIB/2020/OIB.6|Delhi  
hCoV-19/India/MIH-NIV-7966/2020/OIB.6|Maharashtra  
hCoV-19/India/WB-NCDC-2502/2020/OIB.6|West Bengal  
hCoV-19/India/TG-CCMB-O3/2020/OIB.6|Telangana  
hCoV-19/India/MIH-NIV-6311/2020/OIB.6|Maharashtra  
hCoV-19/India/MIH-NIV-6315/2020/OIB.6|Maharashtra  
hCoV-19/India/TG-CCMB-K849/2020/OIB.6|Telangana  
hCoV-19/India/MIH-CCMB-NIV2/2020/OIB.6|Maharashtra  
hCoV-19/India/TG-CCMB-J283/2020/OIB.6|Telangana  
hCoV-19/India/HR-THSTI-BAL-231/2020/OIB.6|Haryana  
hCoV-19/India/TG-CCMB-K128/2020/OIB.6|Telangana  
hCoV-19/India/TG-CCMB-K272/2020/OIB.6|Telangana  
hCoV-19/India/WB-S38/2020/OIB.6|West Bengal  
hCoV-19/India/DL-NCDC1722-CSIR-IGIB/2020/OIB.6|Delhi  
hCoV-19/India/DL-NCDC1762-CSIR-IGIB/2020/OIB.6|Delhi  
hCoV-19/India/DL-NCDC2218-CSIR-IGIB/2020/OIB.6|Delhi  
hCoV-19/India/KA-InStem-NCBS-0063/2020/OIB.6|Karnataka  
hCoV-19/India/KA-IB35/2020/OIB.6|Karnataka  
hCoV-19/India/KA-nimh-1454/2020/OIB.6|Karnataka  
hCoV-19/India/KA-InStem-NCBS-0046/2020/OIB.6|Karnataka  
hCoV-19/India/KA-nimh-10102/2020/OIB.6|Karnataka  
hCoV-19/India/KA-IB47/2020/OIB.6|Karnataka  
hCoV-19/India/KA-IB51/2020/OIB.6|Karnataka  
hCoV-19/India/MIH-NIV-46430/2020/OIB.6|Maharashtra  
hCoV-19/India/TG-CCMB-M499/2020/OIB.6|Telangana  
hCoV-19/India/MIH-NIV-12430/2020/OIB.6|Maharashtra  
hCoV-19/India/MIH-CCMB-NIV1/2020/OIB.6|Maharashtra  
hCoV-19/India/MIH-BJMC-1675/2020/OIB.6|Maharashtra

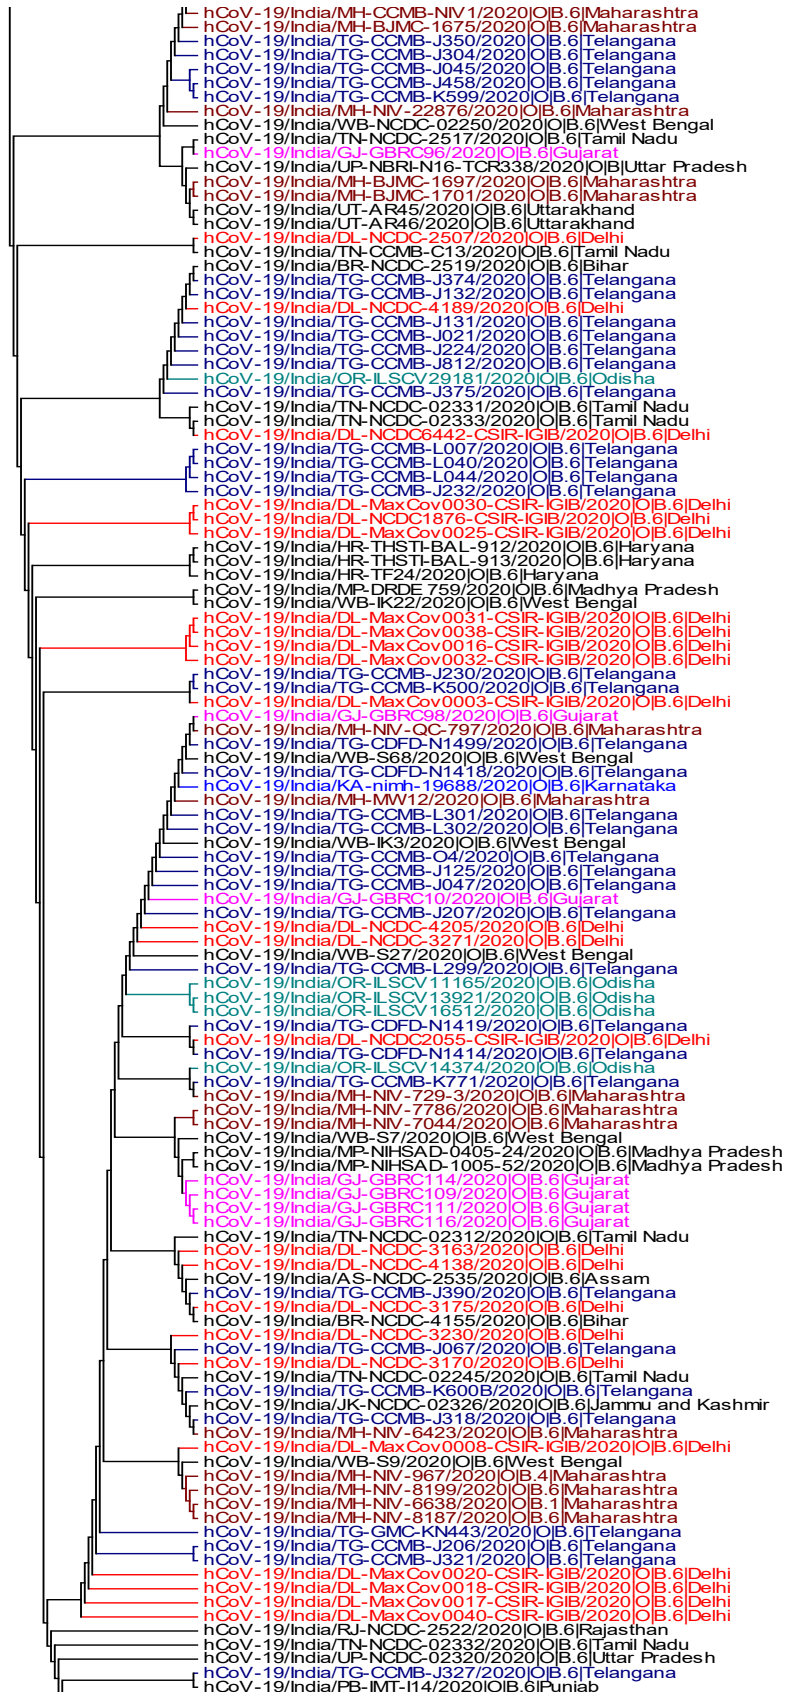



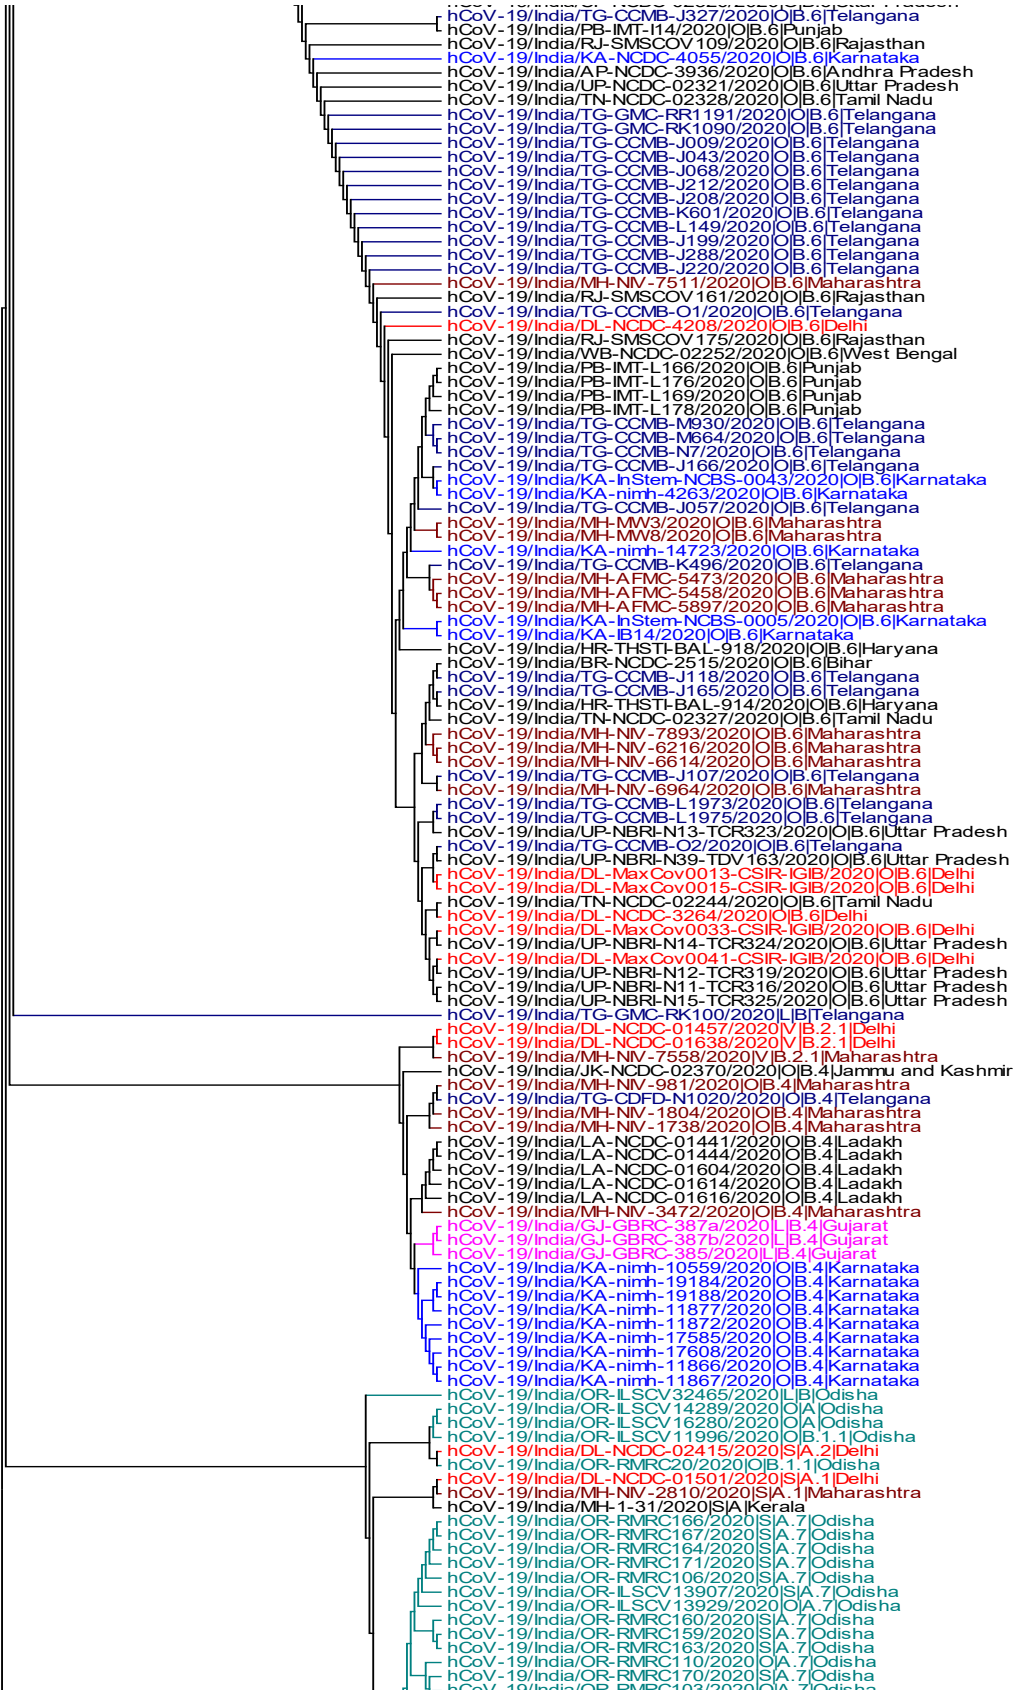

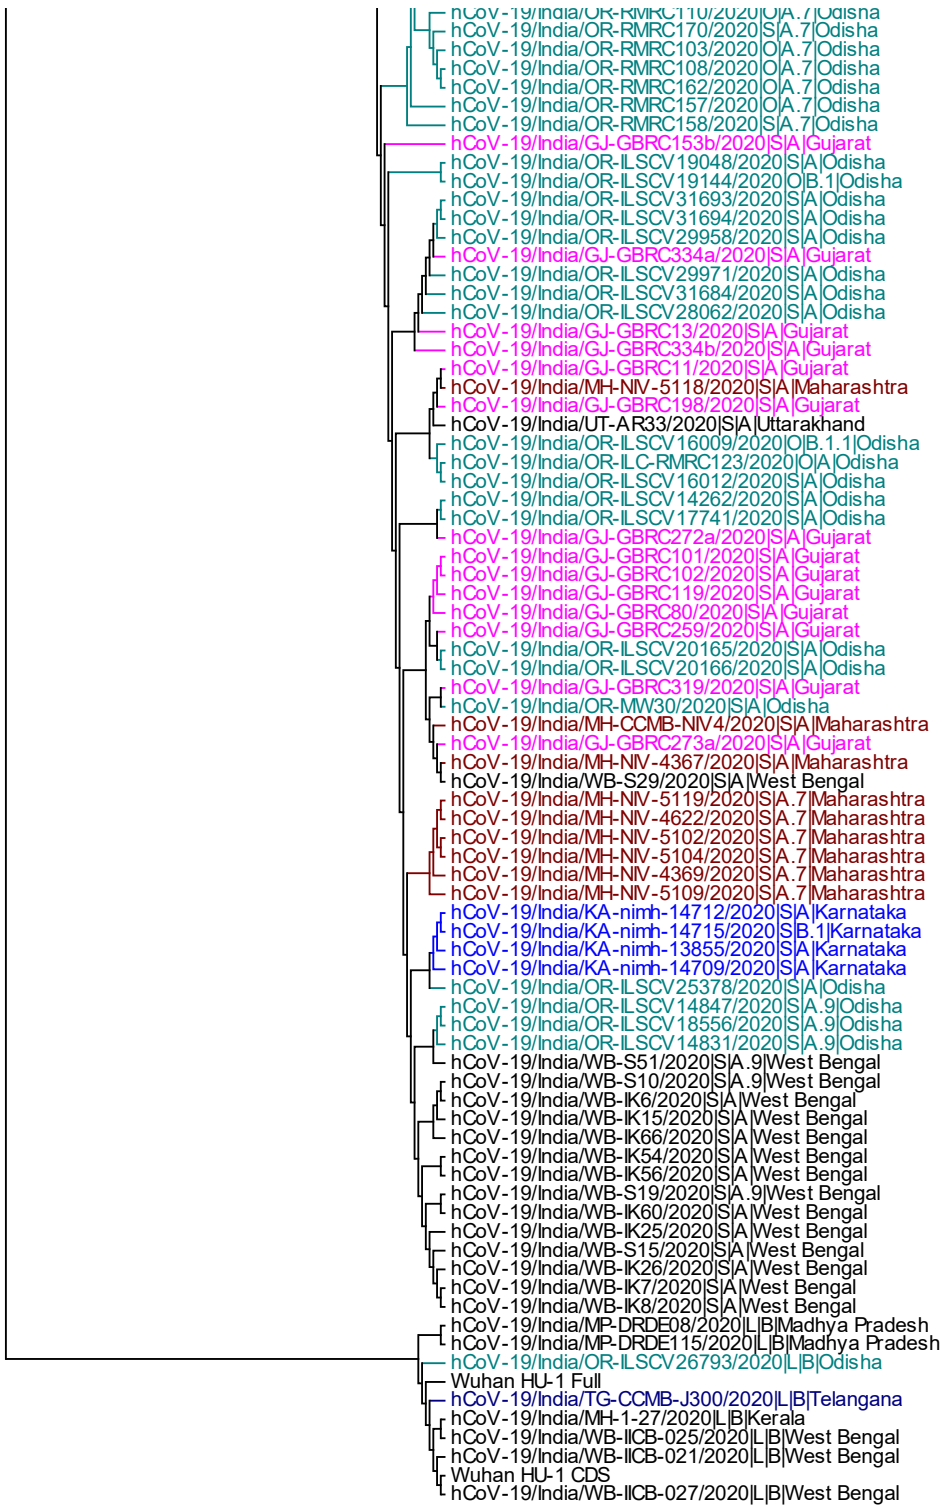

Supplement: IJMR-153-166_Suppl2.pdf [file IJMR-153-166_Suppl2.pdf]
