# Supplementary material for: Phylogenetic classification of the whole-genome sequences of SARS-CoV-2 from India & evolutionary trends
Source: PubMed Central journal article supplement — Indian J Med Res. 2021 Jan-Feb;153(1-2):166–74. doi: 10.4103/ijmr.IJMR_3418_20 (PMC8184080; doi:10.4103/ijmr.ijmr_3418_20), 2021
Supplement: IJMR-153-166_Suppl1.pdf [file IJMR-153-166_Suppl1.pdf]

**Supplementary Table 1.** Strains of this study including details of their sequenced genome

| Specimen ID    | GISAID Accession ID | Virus name                   | Gender | Age (Year) | Collection date | Outcome   | Location (District) | GISAID Clade | Next Strain Clade | Pangolin Lineage | Total Reads | Reads Utilized in IRMA | Genome Length Covered | % Genome Length Covered |
|----------------|---------------------|------------------------------|--------|------------|-----------------|-----------|---------------------|--------------|-------------------|------------------|-------------|------------------------|-----------------------|-------------------------|
| 2019nCoV-10380 | EPI_ISL_452192      | hCoV-19/India/NIV-10380/2020 | Male   | 75         | 16-Apr          | Fatal     | Pune                | GR           | 20B               | B.1.1            | 3186915     | 3129417                | 29808                 | 99.682                  |
| 2019nCoV-10419 | EPI_ISL_452193      | hCoV-19/India/NIV-10419/2020 | Male   | 1.5        | 16-Apr          | Recovered | Pune                | GR           | 20B               | B.1.1            | 1780766     | 1726386                | 29807                 | 99.679                  |
| 2019nCoV-11677 | EPI_ISL_452194      | hCoV-19/India/NIV-11677/2020 | Male   | 3          | 19-Apr          | Recovered | Pune                | GR           | 20B               | B.1.1            | 3181697     | 3127994                | 29797                 | 99.646                  |
| 2019nCoV-11681 | EPI_ISL_452195      | hCoV-19/India/NIV-11681/2020 | Female | 75         | 19-Apr          | Recovered | Pune                | G            | 20A               | B.1              | 3097606     | 2873150                | 29805                 | 99.672                  |
| 2019nCoV-11683 | EPI_ISL_452196      | hCoV-19/India/NIV-11683/2020 | Female | 12         | 19-Apr          | Recovered | Pune                | G            | 20A               | B.1              | 3355215     | 3298838                | 29819                 | 99.719                  |
| 2019nCoV-11687 | EPI_ISL_452197      | hCoV-19/India/NIV-11687/2020 | Female | 32         | 19-Apr          | Recovered | Pune                | GR           | 20B               | B.1.1            | 2863211     | 2713504                | 29903                 | 100                     |
| 2019nCoV-11855 | EPI_ISL_452198      | hCoV-19/India/NIV-11855/2020 | Male   | 22         | 20-Apr          | Recovered | Pune                | GR           | 20B               | B.1.1            | 1149124     | 1111047                | 29807                 | 99.679                  |
| 2019nCoV-12019 | EPI_ISL_452199      | hCoV-19/India/NIV-12019/2020 | Female | 65         | 20-Apr          | Recovered | Pune                | GR           | 20B               | B.1.1            | 1558896     | 1108208                | 29802                 | 99.662                  |
| 2019nCoV-12024 | EPI_ISL_452200      | hCoV-19/India/NIV-12024/2020 | Male   | 98         | 20-Apr          | Recovered | Pune                | GR           | 20B               | B.1.1            | 2792509     | 2707636                | 29803                 | 99.666                  |
| 2019nCoV-12067 | EPI_ISL_452201      | hCoV-19/India/NIV-12067/2020 | Female | 12         | 20-Apr          | Recovered | Pune                | GR           | 20B               | B.1.1            | 3393013     | 3286462                | 29807                 | 99.679                  |
| 2019nCoV-2810  | EPI_ISL_452202      | hCoV-19/India/NIV-2810/2020  | Male   | 26         | 16-Mar          | Recovered | Pune                | S            | 19B               | A.1              | 1579820     | 1507536                | 29810                 | 99.689                  |
| 2019nCoV-4367  | EPI_ISL_452203      | hCoV-19/India/NIV-4367/2020  | Female | 62         | 22-Mar          | Recovered | Sangli              | S            | 19B               | A                | 1200535     | 1053408                | 29878                 | 99.916                  |
| 2019nCoV-5109  | EPI_ISL_452204      | hCoV-19/India/NIV-5109/2020  | Male   | 20         | 26-Mar          | Recovered | Sangli              | S            | 19B               | A                | 1333650     | 1305116                | 29800                 | 99.656                  |
| 2019nCoV-5119  | EPI_ISL_452205      | hCoV-19/India/NIV-5119/2020  | Female | 58         | 26-Mar          | Recovered | Sangli              | S            | 19B               | A                | 1402353     | 1373289                | 29806                 | 99.676                  |
| 2019nCoV-6311  | EPI_ISL_452206      | hCoV-19/India/NIV-6311/2020  | Male   | 68         | 30-Mar          | Recovered | Ahmed nagar         | O            | 19A               | B.6              | 1710292     | 1678284                | 29760                 | 99.522                  |
| 2019nCoV-7439  | EPI_ISL_452207      | hCoV-19/India/NIV-7439/2020  | Female | 10         | 05-Apr          | Recovered | Pune                | GR           | 20B               | B.1.1            | 1895451     | 1841372                | 29844                 | 99.803                  |
| 2019nCoV-7511  | EPI_ISL_452208      | hCoV-19/India/NIV-7511/2020  | Female | 65         | 05-Apr          | Recovered | Jalna               | O            | 19A               | B.6              | 2366875     | 2285424                | 29807                 | 99.679                  |

Contd....

| Specimen ID    | GISAID Accession ID | Virus name                    | Gender    | Age (Year) | Collection date | Outcome   | Location (District) | GISAID Clade | Next Strain Clade | Pangolin Lineage | Total Reads | Reads Utilized in IRMA | Genome Length Covered | % Genome Length Covered |
|----------------|---------------------|-------------------------------|-----------|------------|-----------------|-----------|---------------------|--------------|-------------------|------------------|-------------|------------------------|-----------------------|-------------------------|
| 2019nCoV-7786  | EPI_ISL_452209      | hCoV-19/India/NIV-7786/2020   | Male      | 25         | 06-Apr          | Recovered | Pune                | O            | 19A               | B.6              | 2825514     | 2768891                | 29809                 | 99.686                  |
| 2019nCoV-7830  | EPI_ISL_452210      | hCoV-19/India/NIV-7830/2020   | Male      | 1          | 06-Apr          | Recovered | Pune                | GR           | 20B               | B.1.1            | 2537172     | 2471508                | 29811                 | 99.692                  |
| 2019nCoV-9157  | EPI_ISL_452211      | hCoV-19/India/NIV-9157/2020   | Male      | 52         | 13-Apr          | Recovered | Pune                | GR           | 20B               | B.1.1            | 1710681     | 1638591                | 29805                 | 99.672                  |
| 2019nCoV-9768  | EPI_ISL_452212      | hCoV-19/India/NIV-9768/2020   | Male      | 26         | 15-Apr          | Recovered | Pune                | GR           | 20B               | B.1.1            | 1608743     | 1579805                | 29903                 | 100                     |
| 2019nCoV-981   | EPI_ISL_452213      | hCoV-19/India/NIV-981/2020    | Female    | 24         | 10-Mar          | Recovered | Pune                | O            | 19A               | B.4              | 3242789     | 3128920                | 29836                 | 99.776                  |
| ncov-QA-709    | EPI_ISL_452214      | hCoV-19/India/NIV-QA-709/2020 | Not known | Not known  | 07-Apr          | Recovered | Mumbai              | G            | 20A               | B.1              | 1761158     | 1718815                | 29806                 | 99.676                  |
| ncov-QC-797    | EPI_ISL_452215      | hCoV-19/India/NIV-QC-797/2020 | Not known | Not known  | 22-Apr          | Recovered | Mumbai              | O            | 19A               | B.6              | 2243679     | 1865320                | 29903                 | 100                     |
| ncov-QC-802    | EPI_ISL_452216      | hCoV-19/India/NIV-QC-802/2020 | Not known | Not known  | 27-Apr          | Recovered | Mumbai              | GR           | 20B               | B.1.1            | 1469382     | 226932                 | 29804                 | 99.669                  |
| ncov-QC-800    | EPI_ISL_452217      | hCoV-19/India/NIV-QC-800/2020 | Not known | Not known  | 26-Apr          | Recovered | Mumbai              | G            | 20A               | B.1              | 332606      | 322818                 | 29804                 | 99.669                  |
| 2019nCoV-11182 | EPI_ISL_454521      | hCoV-19/India/NIV-11182/2020  | Female    | 1.5        | 18-Apr          | Recovered | Pune                | GR           | 20B               | B.1.1            | 2757263     | 2678731                | 29529                 | 98.749                  |
| 2019nCoV-11676 | EPI_ISL_454522      | hCoV-19/India/NIV-11676/2020  | Not known | 37         | 19-Apr          | Recovered | Pune                | GR           | 20B               | B.1.1            | 918326      | 399177                 | 29557                 | 98.843                  |
| 2019nCoV-11699 | EPI_ISL_454523      | hCoV-19/India/NIV-11699/2020  | Female    | 59         | 19-Apr          | Recovered | Pune                | GR           | 20B               | B.1.1            | 969317      | 884391                 | 28958                 | 96.84                   |
| 2019nCoV-12058 | EPI_ISL_454524      | hCoV-19/India/NIV-12058/2020  | Male      | 37         | 20-Apr          | Recovered | Pune                | GR           | 20B               | B.1.1            | 3476722     | 3306768                | 29781                 | 99.592                  |
| 2019nCoV-1738  | EPI_ISL_454525      | hCoV-19/India/NIV-1738/2020   | Male      | 41         | 12-Mar          | Recovered | Ahmed nagar         | O            | 19A               | B.4              | 3445101     | 3357236                | 29745                 | 99.472                  |
| 2019nCoV-1804  | EPI_ISL_454526      | hCoV-19/India/NIV-1804/2020   | Female    | 12         | 13-Mar          | Recovered | Pune                | O            | 19A               | B.4              | 1138128     | 728133                 | 29828                 | 99.749                  |
| 2019nCoV-2387  | EPI_ISL_454527      | hCoV-19/India/NIV-2387/2020   | Female    | 59         | 13-Mar          | Recovered | Auran gabad         | G            | 20A               | B.1              | 2625376     | 2466779                | 29797                 | 99.646                  |
| 2019nCoV-3472  | EPI_ISL_454528      | hCoV-19/India/NIV-3472/2020   | Male      | 50         | 17-Mar          | Recovered | Ratnagiri           | O            | 19A               | B.4              | 1941003     | 1825093                | 29793                 | 99.632                  |
| 2019nCoV-4130  | EPI_ISL_454529      | hCoV-19/India/NIV-4130/2020   | Male      | 17         | 21-Mar          | Recovered | Pune                | G            | 20A               | B.1              | 262958      | 235071                 | 29787                 | 99.612                  |

Contid...

| Specimen ID     | GISAID Accession ID | Virus name                    | Gender | Age (Year) | Collection date | Outcome   | Location (District) | GISAID Clade | Next Strain Clade | Pangolin Lineage | Total Reads | Reads Utilized in IRMA | Genome Length Covered | % Genome Length Covered |
|-----------------|---------------------|-------------------------------|--------|------------|-----------------|-----------|---------------------|--------------|-------------------|------------------|-------------|------------------------|-----------------------|-------------------------|
| 2019nCoV-4271   | EPI_ISL_454530      | hCoV-19/India/NIV-4271/2020   | Male   | 46         | 22-Mar          | Recovered | Pune                | G            | 20A               | B.1              | 2271127     | 2195987                | 29793                 | 99.632                  |
| 2019nCoV-4369   | EPI_ISL_454531      | hCoV-19/India/NIV-4369/2020   | Male   | 65         | 22-Mar          | Recovered | Sangli              | S            | 19B               | A                | 1797520     | 1710262                | 29787                 | 99.612                  |
| 2019nCoV-4379   | EPI_ISL_454532      | hCoV-19/India/NIV-4379/2020   | Female | 45         | 23-Mar          | Recovered | Satara              | G            | 20A               | B.1              | 517838      | 455441                 | 29780                 | 99.589                  |
| 2019nCoV-4438   | EPI_ISL_454533      | hCoV-19/India/NIV-4438/2020   | Male   | 53         | 23-Mar          | Recovered | Satara              | G            | 20A               | B.1.5            | 482579      | 416044                 | 29786                 | 99.609                  |
| 2019nCoV-4622   | EPI_ISL_454534      | hCoV-19/India/NIV-4622/2020   | Female | 5          | 24-Mar          | Recovered | Sangli              | S            | 19B               | A                | 2317675     | 2165683                | 29704                 | 99.335                  |
| 2019nCoV-5097   | EPI_ISL_454535      | hCoV-19/India/NIV-5097/2020   | Female | 70         | 26-Mar          | Recovered | Sangli              | S            | 19B               | A                | 264943      | 223180                 | 26762                 | 89.496                  |
| 2019nCoV-5102   | EPI_ISL_454536      | hCoV-19/India/NIV-5102/2020   | Female | 39         | 26-Mar          | Recovered | Sangli              | S            | 19B               | A                | 2691480     | 2657866                | 29821                 | 99.726                  |
| 2019nCoV-5104   | EPI_ISL_454537      | hCoV-19/India/NIV-5104/2020   | Male   | 45         | 26-Mar          | Recovered | Sangli              | S            | 19B               | A                | 1666455     | 1640718                | 29774                 | 99.569                  |
| 2019nCoV-5118   | EPI_ISL_454538      | hCoV-19/India/NIV-5118/2020   | Male   | 35         | 26-Mar          | Recovered | Sangli              | S            | 19B               | A                | 1149966     | 1109165                | 27578                 | 92.225                  |
| 2019nCoV-5815-1 | EPI_ISL_454539      | hCoV-19/India/NIV-5815-1/2020 | Male   | 64         | 12-Apr          | Recovered | Pune                | O            | 19A               | B.6              | 1841522     | 1709542                | 29358                 | 98.177                  |
| 2019nCoV-6216   | EPI_ISL_454540      | hCoV-19/India/NIV-6216/2020   | Male   | 35         | 01-Apr          | Recovered | Pune                | O            | 19A               | B.6              | 2951844     | 2851436                | 29805                 | 99.672                  |
| 2019nCoV-6285   | EPI_ISL_454541      | hCoV-19/India/NIV-6285/2020   | Male   | 39         | 30-Mar          | Recovered | Ahmed nagar         | O            | 19A               | B.6              | 260488      | 234110                 | 28717                 | 96.034                  |
| 2019nCoV-6315   | EPI_ISL_454542      | hCoV-19/India/NIV-6315/2020   | Male   | 17         | 30-Mar          | Recovered | Ahmed nagar         | O            | 19A               | B.6              | 3867546     | 3784465                | 29808                 | 99.682                  |
| 2019nCoV-6423   | EPI_ISL_454543      | hCoV-19/India/NIV-6423/2020   | Female | 40         | 31-Mar          | Recovered | Ahmed nagar         | O            | 19A               | B.6              | 2208948     | 2183826                | 29790                 | 99.622                  |
| 2019nCoV-6614   | EPI_ISL_454544      | hCoV-19/India/NIV-6614/2020   | Female | 35         | 02-Apr          | Recovered | Pune                | O            | 19A               | B.6              | 2129762     | 2067033                | 29704                 | 99.335                  |
| 2019nCoV-6638   | EPI_ISL_454545      | hCoV-19/India/NIV-6638/2020   | Male   | 59         | 02-Apr          | Recovered | Ratnagiri           | O            | 19A               | B.6              | 160049      | 121389                 | 25838                 | 86.406                  |
| 2019nCoV-6964   | EPI_ISL_454546      | hCoV-19/India/NIV-6964/2020   | Male   | 19         | 03-Apr          | Recovered | Latur               | O            | 19A               | B.6              | 286119      | 82663                  | 29738                 | 99.448                  |
| 2019nCoV-7044   | EPI_ISL_454547      | hCoV-19/India/NIV-7044/2020   | Male   | 23         | 04-Apr          | Recovered | Pune                | O            | 19A               | B.6              | 2073010     | 2016629                | 29807                 | 99.679                  |

Contid...

| Specimen ID   | GISAID Accession ID | Virus name                    | Gender    | Age (Year) | Collection date | Outcome   | Location (District) | GISAID Clade | Next Strain Clade | Pangolin Lineage | Total Reads | Reads Utilized in IRMA | Genome Length Covered | % Genome Length Covered |
|---------------|---------------------|-------------------------------|-----------|------------|-----------------|-----------|---------------------|--------------|-------------------|------------------|-------------|------------------------|-----------------------|-------------------------|
| 2019nCoV-7098 | EPI_ISL_454548      | hCoV-19/India/NIV-7098/2020   | Male      | 42         | 03-Apr          | Recovered | Osman abad          | O            | 19A               | B.6              | 320366      | 264588                 | 28553                 | 95.485                  |
| 2019nCoV-7558 | EPI_ISL_454549      | hCoV-19/India/NIV-7558/2020   | Male      | 22         | 05-Apr          | Recovered | Satara              | V            | 19A               | B.2.1            | 724596      | 662567                 | 29804                 | 99.669                  |
| 2019nCoV-7832 | EPI_ISL_454550      | hCoV-19/India/NIV-7832/2020   | Female    | 20         | 06-Apr          | Recovered | Pune                | GR           | 20B               | B.1.1            | 1306429     | 1194909                | 29275                 | 97.9                    |
| 2019nCoV-7893 | EPI_ISL_454551      | hCoV-19/India/NIV-7893/2020   | Female    | 63         | 07-Apr          | Recovered | Pune                | O            | 19A               | B.6              | 1967921     | 1937049                | 29798                 | 99.649                  |
| 2019nCoV-7966 | EPI_ISL_454552      | hCoV-19/India/NIV-7966/2020   | Male      | 63         | 06-Apr          | Recovered | Ahmed nagar         | O            | 19A               | B.6              | 700073      | 680399                 | 29689                 | 99.284                  |
| 2019nCoV-8187 | EPI_ISL_454553      | hCoV-19/India/NIV-8187/2020   | Male      | 16         | 02-Apr          | Recovered | Nagpur              | O            | 19A               | B.6              | 2263264     | 2127435                | 29903                 | 100                     |
| 2019nCoV-8199 | EPI_ISL_454554      | hCoV-19/India/NIV-8199/2020   | Male      | 30         | 02-Apr          | Recovered | Nagpur              | O            | 19A               | B.6              | 1338286     | 848309                 | 28812                 | 96.352                  |
| 2019nCoV-8404 | EPI_ISL_454555      | hCoV-19/India/NIV-8404/2020   | Male      | 30         | 07-Apr          | Recovered | Kolhapur            | O            | 19A               | B                | 1458128     | 1389179                | 28774                 | 96.224                  |
| 2019nCoV-9127 | EPI_ISL_454556      | hCoV-19/India/NIV-9127/2020   | Female    | 25         | 12-Apr          | Recovered | Pune                | O            | 20B               | B.1.1            | 1590768     | 1564994                | 29700                 | 99.321                  |
| 2019nCoV-9154 | EPI_ISL_454557      | hCoV-19/India/NIV-9154/2020   | Male      | 80         | 13-Apr          | Recovered | Pune                | GR           | 20B               | B.1.1            | 1959192     | 1910825                | 29801                 | 99.659                  |
| 2019nCoV-9314 | EPI_ISL_454558      | hCoV-19/India/NIV-9314/2020   | Female    | 70         | 13-Apr          | Recovered | Pune                | GR           | 20B               | B.1.1            | 437653      | 351647                 | 29662                 | 99.194                  |
| 2019nCoV-967  | EPI_ISL_454559      | hCoV-19/India/NIV-967/2020    | Male      | 51         | 09-Mar          | Recovered | Pune                | O            | 19A               | B.4              | 1077743     | 1020639                | 29541                 | 98.789                  |
| COV19-701_3   | EPI_ISL_454560      | hCoV-19/India/NIV-701_3/2020  | Male      | 38         | 06-Apr          | Recovered | Mumbai              | G            | 20A               | B.1              | 2374922     | 2275895                | 29795                 | 99.639                  |
| COV19-729_3   | EPI_ISL_454561      | hCoV-19/India/NIV-729_3/2020  | Female    | 24         | 07-Apr          | Recovered | Mumbai              | O            | 19A               | B.6              | 241377      | 208921                 | 29588                 | 98.947                  |
| COV19-815_3   | EPI_ISL_454562      | hCoV-19/India/NIV-815_3/2020  | Male      | 76         | 07-Apr          | Recovered | Mumbai              | G            | 19A               | B                | 1840088     | 1716979                | 29520                 | 98.719                  |
| ncov QA-707   | EPI_ISL_454563      | hCoV-19/India/NIV-QA-707/2020 | Not known | Not known  | 10-Apr          | Recovered | Mumbai              | GR           | 20B               | B.1.1            | 2319502     | 2235612                | 29828                 | 99.749                  |
| ncov QA-708   | EPI_ISL_454564      | hCoV-19/India/NIV-QA-708/2020 | Not known | Not known  | 04-Apr          | Recovered | Mumbai              | GR           | 20B               | B.1.1            | 139513      | 133167                 | 29766                 | 99.542                  |
| ncov QA-710   | EPI_ISL_454565      | hCoV-19/India/NIV-QA-710/2020 | Not known | Not known  | 31-Mar          | Recovered | Mumbai              | GR           | 20B               | B.1.1            | 2132301     | 2105691                | 29798                 | 99.649                  |

Contid...

| Specimen ID    | GISAID Accession ID | Virus name                    | Gender    | Age (Year) | Collection date | Outcome   | Location (District) | GISAID Clade | Next Strain Clade | Pangolin Lineage | Total Reads | Reads Utilized in IRMA | Genome Length Covered | % Genome Length Covered |
|----------------|---------------------|-------------------------------|-----------|------------|-----------------|-----------|---------------------|--------------|-------------------|------------------|-------------|------------------------|-----------------------|-------------------------|
| ncovQC-795     | EPI_ISL_454566      | hCoV-19/India/NIV-QC-795/2020 | Not known | Not known  | 21-Apr          | Recovered | Mumbai              | G            | 20A               | B.1              | 2013981     | 1983559                | 29815                 | 99.706                  |
| ncovQC-796     | EPI_ISL_454567      | hCoV-19/India/NIV-QC-796/2020 | Not known | Not known  | 22-Apr          | Recovered | Mumbai              | GR           | 20B               | B.1.1            | 2005827     | 1963193                | 29798                 | 99.649                  |
| ncovQC-798     | EPI_ISL_454568      | hCoV-19/India/NIV-QC-798/2020 | Not known | Not known  | 25-Apr          | Recovered | Mumbai              | O            | 19A               | B.6              | 1189106     | 1103326                | 29780                 | 99.589                  |
| ncovQC-799     | EPI_ISL_454569      | hCoV-19/India/NIV-QC-799/2020 | Not known | Not known  | 26-Apr          | Recovered | Mumbai              | G            | 20A               | B.1              | 476556      | 58481                  | 29815                 | 99.706                  |
| ncovQC-801     | EPI_ISL_454570      | hCoV-19/India/NIV-QC-801/2020 | Not known | Not known  | 26-Apr          | Recovered | Mumbai              | G            | 20A               | B.1              | 433874      | 61217                  | 29766                 | 99.542                  |
| 2019nCoV-10176 | EPI_ISL_479493      | hCoV-19/India/NIV-10176/2020  | Female    | 42         | 15-Apr          | Recovered | Pune                | GR           | 20B               | B.1.1            | 1891782     | 1844453                | 29804                 | 99.669                  |
| 2019nCoV-11670 | EPI_ISL_479494      | hCoV-19/India/NIV-11670/2020  | Male      | 50         | 19-Apr          | Recovered | Pune                | GR           | 20B               | B.1.1            | 595734      | 577038                 | 29802                 | 99.662                  |
| 2019nCoV-11857 | EPI_ISL_479495      | hCoV-19/India/NIV-11857/2020  | Female    | 58         | 19-Apr          | Fatal     | Pune                | G            | 20A               | B.1              | 1960729     | 1895330                | 29804                 | 99.669                  |
| 2019nCoV-12430 | EPI_ISL_479496      | hCoV-19/India/NIV-12430/2020  | Female    | 24         | 21-Apr          | Recovered | Pune                | O            | 19A               | B.6              | 1562252     | 1521288                | 29798                 | 99.649                  |
| 2019nCoV-12628 | EPI_ISL_479497      | hCoV-19/India/NIV-12628/2020  | Male      | 40         | 21-Apr          | Recovered | Pune                | GR           | 20B               | B.1.1            | 1009294     | 979005                 | 29800                 | 99.656                  |
| 2019nCoV-13307 | EPI_ISL_479498      | hCoV-19/India/NIV-13307/2020  | Female    | 50         | 23-Apr          | Fatal     | Pune                | GR           | 20B               | B.1.1            | 1332106     | 116462                 | 29762                 | 99.528                  |
| 2019nCoV-14614 | EPI_ISL_479499      | hCoV-19/India/NIV-14614/2020  | Male      | 51         | 25-Apr          | Fatal     | Pune                | GR           | 20B               | B.1.1            | 1095271     | 228420                 | 29798                 | 99.649                  |
| 2019nCoV-15115 | EPI_ISL_479500      | hCoV-19/India/NIV-15115/2020  | Female    | 50         | 25-Apr          | Recovered | Pune                | GR           | 20B               | B.1.1            | 1732958     | 11303                  | 29793                 | 99.632                  |
| 2019nCoV-15351 | EPI_ISL_479501      | hCoV-19/India/NIV-15351/2020  | Male      | 48         | 26-Apr          | Fatal     | Pune                | GR           | 20B               | B.1.1            | 3167031     | 2984848                | 29805                 | 99.672                  |
| 2019nCoV-15768 | EPI_ISL_479502      | hCoV-19/India/NIV-15768/2020  | Female    | 53         | 27-Apr          | Fatal     | Pune                | GR           | 20B               | B.1.1            | 1298465     | 489831                 | 29805                 | 99.672                  |
| 2019nCoV-15879 | EPI_ISL_479503      | hCoV-19/India/NIV-15879/2020  | Female    | 50         | 27-Apr          | Recovered | Pune                | GR           | 20B               | B.1.1            | 1394162     | 543113                 | 29795                 | 99.639                  |
| 2019nCoV-15941 | EPI_ISL_479504      | hCoV-19/India/NIV-15941/2020  | Female    | 35         | 27-Apr          | Recovered | Pune                | GR           | 20B               | B.1.1            | 2263158     | 2192333                | 29798                 | 99.649                  |
| 2019nCoV-16503 | EPI_ISL_479505      | hCoV-19/India/NIV-16503/2020  | Female    | 61         | 28-Apr          | Fatal     | Pune                | GR           | 20B               | B.1.1            | 1058354     | 1029933                | 29801                 | 99.659                  |

Contid....

| Specimen ID    | GISAID Accession ID | Virus name                   | Gender | Age (Year) | Collection date | Outcome   | Location (District) | GISAID Clade | Next Strain Clade | Pangolin Lineage | Total Reads | Reads Utilized in IRMA | Genome Length Covered | % Genome Length Covered |
|----------------|---------------------|------------------------------|--------|------------|-----------------|-----------|---------------------|--------------|-------------------|------------------|-------------|------------------------|-----------------------|-------------------------|
| 2019nCoV-16936 | EPI_ISL_479506      | hCoV-19/India/NIV-16936/2020 | Male   | 10         | 28-Apr          | Recovered | Pune                | GR           | 20B               | B.1.1            | 214190      | 102900                 | 29767                 | 99.545                  |
| 2019nCoV-17002 | EPI_ISL_479507      | hCoV-19/India/NIV-17002/2020 | Female | 58         | 29-Apr          | Fatal     | Pune                | GR           | 20B               | B.1.1            | 1339667     | 793540                 | 29798                 | 99.649                  |
| 2019nCoV-17547 | EPI_ISL_479508      | hCoV-19/India/NIV-17547/2020 | Female | 40         | 29-Apr          | Recovered | Pune                | GR           | 20B               | B.1.1            | 1557746     | 1344410                | 29798                 | 99.649                  |
| 2019nCoV-17570 | EPI_ISL_479509      | hCoV-19/India/NIV-17570/2020 | Male   | 65         | 30-Apr          | Fatal     | Pune                | GR           | 20B               | B.1.1            | 2736667     | 671507                 | 29834                 | 99.769                  |
| 2019nCoV-18650 | EPI_ISL_479510      | hCoV-19/India/NIV-18650/2020 | Female | 50         | 30-Apr          | Fatal     | Pune                | GR           | 20B               | B.1.1            | 1310879     | 1236722                | 29795                 | 99.639                  |
| 2019nCoV-18728 | EPI_ISL_479511      | hCoV-19/India/NIV-18728/2020 | Female | 16         | 01-May          | Recovered | Pune                | GR           | 20B               | B.1.1            | 2588331     | 2435903                | 29813                 | 99.699                  |
| 2019nCoV-19746 | EPI_ISL_479512      | hCoV-19/India/NIV-19746/2020 | Female | 58         | 03-May          | Fatal     | Pune                | GR           | 20B               | B.1.1            | 922724      | 885118                 | 29790                 | 99.622                  |
| 2019nCoV-20134 | EPI_ISL_479513      | hCoV-19/India/NIV-20134/2020 | Male   | 55         | 04-May          | Fatal     | Pune                | GR           | 20B               | B.1.1            | 953021      | 924732                 | 29801                 | 99.659                  |
| 2019nCoV-20608 | EPI_ISL_479514      | hCoV-19/India/NIV-20608/2020 | Male   | 67         | 04-May          | Fatal     | Pune                | GR           | 20B               | B.1.1            | 1896779     | 1835111                | 29803                 | 99.666                  |
| 2019nCoV-20878 | EPI_ISL_479515      | hCoV-19/India/NIV-20878/2020 | Female | 48         | 05-May          | Recovered | Pune                | GR           | 20B               | B.1.1            | 2853186     | 1426296                | 29808                 | 99.682                  |
| 2019nCoV-21041 | EPI_ISL_479516      | hCoV-19/India/NIV-21041/2020 | Male   | 40         | 05-May          | Recovered | Pune                | G            | 20A               | B.1              | 93454       | 78194                  | 29757                 | 99.512                  |
| 2019nCoV-21455 | EPI_ISL_479517      | hCoV-19/India/NIV-21455/2020 | Male   | 64         | 05-May          | Fatal     | Pune                | GR           | 20B               | B.1.1            | 2051975     | 1990945                | 29803                 | 99.666                  |
| 2019nCoV-22048 | EPI_ISL_479518      | hCoV-19/India/NIV-22048/2020 | Male   | 45         | 06-May          | Recovered | Pune                | GR           | 20B               | B.1.1            | 2471842     | 2295154                | 29804                 | 99.669                  |
| 2019nCoV-22552 | EPI_ISL_479519      | hCoV-19/India/NIV-22552/2020 | Male   | 67         | 07-May          | Fatal     | Pune                | GR           | 20B               | B.1.1            | 719983      | 207366                 | 29799                 | 99.652                  |
| 2019nCoV-22876 | EPI_ISL_479520      | hCoV-19/India/NIV-22876/2020 | Female | 65         | 07-May          | Recovered | Pune                | O            | 19A               | B.6              | 1261149     | 703620                 | 29808                 | 99.682                  |
| 2019nCoV-23098 | EPI_ISL_479521      | hCoV-19/India/NIV-23098/2020 | Female | 70         | 07-May          | Fatal     | Pune                | GR           | 20B               | B.1.1            | 1869361     | 1603265                | 29806                 | 99.676                  |
| 2019nCoV-23721 | EPI_ISL_479522      | hCoV-19/India/NIV-23721/2020 | Male   | 75         | 08-May          | Fatal     | Pune                | GR           | 20B               | B.1.1            | 121109      | 116855                 | 29809                 | 99.686                  |
| 2019nCoV-24174 | EPI_ISL_479523      | hCoV-19/India/NIV-24174/2020 | Male   | 43         | 08-May          | Fatal     | Pune                | GR           | 20B               | B.1.1            | 4050620     | 3837266                | 29808                 | 99.682                  |

Contid...

| Specimen ID    | GISAID Accession ID | Virus name                   | Gender | Age (Year) | Collection date | Outcome   | Location (District) | GISAID Clade | Next Strain Clade | Pangolin Lineage | Total Reads | Reads Utilized in IRMA | Genome Length Covered | % Genome Length Covered |
|----------------|---------------------|------------------------------|--------|------------|-----------------|-----------|---------------------|--------------|-------------------|------------------|-------------|------------------------|-----------------------|-------------------------|
| 2019nCoV-25950 | EPI_ISL_479524      | hCoV-19/India/NIV-25950/2020 | Male   | 75         | 10-May          | Recovered | Pune                | GR           | 20B               | B.1.1            | 636809      | 584944                 | 29766                 | 99.542                  |
| 2019nCoV-26115 | EPI_ISL_479525      | hCoV-19/India/NIV-26115/2020 | Female | 68         | 12-May          | Fatal     | Pune                | GR           | 20B               | B.1.1            | 442682      | 360037                 | 29669                 | 99.217                  |
| 2019nCoV-27109 | EPI_ISL_479526      | hCoV-19/India/NIV-27109/2020 | Male   | 66         | 11-May          | Fatal     | Pune                | GR           | 20B               | B.1.1            | 3610538     | 2515965                | 29811                 | 99.692                  |
| 2019nCoV-28147 | EPI_ISL_479527      | hCoV-19/India/NIV-28147/2020 | Male   | 58         | 12-May          | Fatal     | Pune                | G            | 20A               | B.1              | 1154194     | 1053272                | 29801                 | 99.659                  |
| 2019nCoV-28416 | EPI_ISL_479528      | hCoV-19/India/NIV-28416/2020 | Male   | 38         | 12-May          | Fatal     | Pune                | GR           | 20B               | B.1.1            | 613384      | 445917                 | 29796                 | 99.642                  |
| 2019nCoV-28815 | EPI_ISL_479529      | hCoV-19/India/NIV-28815/2020 | Female | 85         | 13-May          | Fatal     | Pune                | GR           | 20B               | B.1.1            | 289008      | 279773                 | 29846                 | 99.809                  |
| 2019nCoV-28900 | EPI_ISL_479530      | hCoV-19/India/NIV-28900/2020 | Male   | 80         | 13-May          | Fatal     | Pune                | GR           | 20B               | B.1.1            | 806506      | 508738                 | 29779                 | 99.585                  |
| 2019nCoV-29053 | EPI_ISL_479531      | hCoV-19/India/NIV-29053/2020 | Female | 72         | 13-May          | Fatal     | Pune                | GR           | 20B               | B.1.1            | 1368601     | 1302113                | 29798                 | 99.649                  |
| 2019nCoV-29909 | EPI_ISL_479532      | hCoV-19/India/NIV-29909/2020 | Male   | 65         | 14-May          | Fatal     | Pune                | GR           | 20B               | B.1.1            | 229672      | 140665                 | 29795                 | 99.639                  |
| 2019nCoV-31191 | EPI_ISL_479533      | hCoV-19/India/NIV-31191/2020 | Male   | 79         | 15-May          | Fatal     | Pune                | GR           | 20B               | B.1.1            | 2449108     | 252499                 | 29800                 | 99.656                  |
| 2019nCoV-35868 | EPI_ISL_479534      | hCoV-19/India/NIV-35868/2020 | Female | 61         | 19-May          | Fatal     | Pune                | GR           | 20B               | B.1.1            | 3343317     | 3251483                | 29800                 | 99.656                  |
| 2019nCoV-36405 | EPI_ISL_479535      | hCoV-19/India/NIV-36405/2020 | Male   | 40         | 18-May          | Fatal     | Pune                | GR           | 20B               | B.1.1            | 3477980     | 3393421                | 29808                 | 99.682                  |
| 2019nCoV-36444 | EPI_ISL_479536      | hCoV-19/India/NIV-36444/2020 | Female | 60         | 19-May          | Fatal     | Pune                | GR           | 20B               | B.1.1            | 1057675     | 961523                 | 29805                 | 99.672                  |
| 2019nCoV-36461 | EPI_ISL_479537      | hCoV-19/India/NIV-36461/2020 | Female | 70         | 20-May          | Fatal     | Pune                | GR           | 20B               | B.1.1            | 584634      | 387087                 | 29801                 | 99.659                  |
| 2019nCoV-37486 | EPI_ISL_479538      | hCoV-19/India/NIV-37486/2020 | Male   | 61         | 20-May          | Fatal     | Pune                | GR           | 20B               | B.1.1            | 798000      | 732425                 | 29802                 | 99.662                  |
| 2019nCoV-37502 | EPI_ISL_479539      | hCoV-19/India/NIV-37502/2020 | Male   | 58         | 21-May          | Fatal     | Pune                | G            | 20A               | B.1              | 1821558     | 1765521                | 29809                 | 99.686                  |
| 2019nCoV-37681 | EPI_ISL_479540      | hCoV-19/India/NIV-37681/2020 | Male   | 65         | 21-May          | Recovered | Pune                | GR           | 20B               | B.1.1            | 1166589     | 1053162                | 29830                 | 99.756                  |
| 2019nCoV-37985 | EPI_ISL_479541      | hCoV-19/India/NIV-37985/2020 | Male   | 27         | 21-May          | Recovered | Pune                | GR           | 20B               | B.1.1            | 1608460     | 1554481                | 29809                 | 99.686                  |

Contid...

| Specimen ID    | GISAID Accession ID | Virus name                   | Gender | Age (Year) | Collection date | Outcome   | Location (District) | GISAID Clade | Next Strain Clade | Pangolin Lineage | Total Reads | Reads Utilized in IRMA | Genome Length Covered | % Genome Length Covered |
|----------------|---------------------|------------------------------|--------|------------|-----------------|-----------|---------------------|--------------|-------------------|------------------|-------------|------------------------|-----------------------|-------------------------|
| 2019nCoV-38793 | EPI_ISL_479542      | hCoV-19/India/NIV-38793/2020 | Female | 45         | 22-May          | Recovered | Pune                | GR           | 20B               | B.1.1            | 1564990     | 1372543                | 29782                 | 99.595                  |
| 2019nCoV-40837 | EPI_ISL_479543      | hCoV-19/India/NIV-40837/2020 | Female | 58         | 23-May          | Fatal     | Pune                | GR           | 20B               | B.1.1            | 2586747     | 2335968                | 29811                 | 99.692                  |
| 2019nCoV-42694 | EPI_ISL_479544      | hCoV-19/India/NIV-42694/2020 | Female | 38         | 24-May          | Recovered | Pune                | GR           | 20B               | B.1.1            | 1009624     | 966981                 | 29767                 | 99.545                  |
| 2019nCoV-46430 | EPI_ISL_479545      | hCoV-19/India/NIV-46430/2020 | Male   | 10         | 26-May          | Recovered | Pune                | O            | 19A               | B.6              | 2263635     | 2188137                | 29805                 | 99.672                  |
| 2019nCoV-44241 | EPI_ISL_479546      | hCoV-19/India/NIV-44241/2020 | Male   | 77         | 25-May          | Recovered | Pune                | G            | 19A               | B                | 2427022     | 1908631                | 29810                 | 99.689                  |
| 2019nCoV-45071 | EPI_ISL_479547      | hCoV-19/India/NIV-45071/2020 | Female | 43         | 26-May          | Recovered | Pune                | GR           | 20B               | B.1.1            | 474255      | 447681                 | 29804                 | 99.669                  |
| 2019nCoV-45936 | EPI_ISL_479548      | hCoV-19/India/NIV-45936/2020 | Male   | 30         | 28-May          | Fatal     | Pune                | GR           | 20B               | B.1.1            | 1882564     | 1708425                | 29783                 | 99.599                  |
| 2019nCoV-46303 | EPI_ISL_479549      | hCoV-19/India/NIV-46303/2020 | Female | 67         | 26-May          | Fatal     | Pune                | GR           | 20B               | B.1.1            | 1297505     | 12558                  | 29532                 | 98.759                  |
| 2019nCoV-46317 | EPI_ISL_479550      | hCoV-19/India/NIV-46317/2020 | Female | 67         | 01-Jun          | Fatal     | Pune                | GR           | 20B               | B.1.1            | 2129201     | 1843188                | 29791                 | 99.625                  |
| 2019nCoV-46348 | EPI_ISL_479551      | hCoV-19/India/NIV-46348/2020 | Male   | 11         | 28-May          | Recovered | Pune                | GR           | 20B               | B.1.1            | 510181      | 172665                 | 29760                 | 99.522                  |
| 2019nCoV-47109 | EPI_ISL_479552      | hCoV-19/India/NIV-47109/2020 | Female | 22         | 28-May          | Recovered | Pune                | GR           | 20B               | B.1.1            | 1885885     | 1804562                | 29781                 | 99.592                  |
| 2019nCoV-47470 | EPI_ISL_479553      | hCoV-19/India/NIV-47470/2020 | Male   | 72         | 31-May          | Fatal     | Pune                | GR           | 20B               | B.1.1            | 1427300     | 777085                 | 29796                 | 99.642                  |
| 2019nCoV-64463 | EPI_ISL_479554      | hCoV-19/India/NIV-64463/2020 | Female | 26         | 15-Jun          | Recovered | Pune                | GR           | 20B               | B.1.1            | 1599112     | 1549651                | 29804                 | 99.669                  |
| 2019nCoV-64478 | EPI_ISL_479555      | hCoV-19/India/NIV-64478/2020 | Female | 15         | 15-Jun          | Recovered | Pune                | GR           | 20B               | B.1.1            | 2405706     | 2371236                | 29798                 | 99.649                  |
| 2019nCoV-64850 | EPI_ISL_479556      | hCoV-19/India/NIV-64850/2020 | Female | 32         | 16-Jun          | Recovered | Pune                | GR           | 20B               | B.1.1            | 85139       | 81178                  | 29805                 | 99.672                  |
| 2019nCoV-64877 | EPI_ISL_479557      | hCoV-19/India/NIV-64877/2020 | Male   | 14         | 16-Jun          | Recovered | Pune                | GR           | 20B               | B.1.1            | 296173      | 289332                 | 29845                 | 99.806                  |
| 2019nCoV-64904 | EPI_ISL_479558      | hCoV-19/India/NIV-64904/2020 | Female | 40         | 16-Jun          | Recovered | Pune                | GR           | 20B               | B.1.1            | 3083581     | 2993515                | 29839                 | 99.786                  |
| 2019nCoV-64905 | EPI_ISL_479559      | hCoV-19/India/NIV-64905/2020 | Female | 4          | 16-Jun          | Recovered | Pune                | GR           | 20B               | B.1.1            | 1062372     | 1034111                | 29835                 | 99.773                  |

Contid...



| Specimen ID    | GISAID Accession ID | Virus name                       | Gender | Age (Year) | Collection date | Outcome   | Location (District) | GISAID Clade | Next Strain Clade | Pangolin Lineage | Total Reads | Reads Utilized in IRMA | Genome Length Covered | % Genome Length Covered |
|----------------|---------------------|----------------------------------|--------|------------|-----------------|-----------|---------------------|--------------|-------------------|------------------|-------------|------------------------|-----------------------|-------------------------|
| 2019nCoV-64908 | EPI_ISL_479560      | hCoV-19/India/NIV-64908/2020     | Female | 52         | 16-Jun          | Recovered | Pune                | GR           | 20B               | B.1.1            | 2131556     | 2095670                | 29805                 | 99.672                  |
| 2019nCoV-65281 | EPI_ISL_479561      | hCoV-19/India/NIV-65281/2020     | Female | 48         | 16-Jun          | Recovered | Pune                | O            | 20B               | B.1.1            | 1235569     | 1187877                | 29564                 | 98.866                  |
| 2019nCoV-65282 | EPI_ISL_479562      | hCoV-19/India/NIV-65282/2020     | Male   | 25         | 16-Jun          | Recovered | Pune                | GR           | 20B               | B.1.1            | 1364980     | 1326860                | 29804                 | 99.669                  |
| 2019nCoV-65417 | EPI_ISL_479563      | hCoV-19/India/NIV-65417/2020     | Male   | 24         | 16-Jun          | Recovered | Pune                | GR           | 20B               | B.1.1            | 1818457     | 1769691                | 29808                 | 99.682                  |
| 2019nCoV-65433 | EPI_ISL_479564      | hCoV-19/India/NIV-65433/2020     | Female | 70         | 16-Jun          | Recovered | Pune                | GR           | 20B               | B.1.1            | 2193707     | 2136243                | 29801                 | 99.659                  |
| 2019nCoV-65813 | EPI_ISL_479565      | hCoV-19/India/NIV-65813/2020     | Male   | 28         | 16-Jun          | Recovered | Pune                | GR           | 20B               | B.1.1            | 804729      | 786941                 | 29800                 | 99.656                  |
| 2019nCoV-65829 | EPI_ISL_479566      | hCoV-19/India/NIV-65829/2020     | Male   | 13         | 16-Jun          | Recovered | Pune                | GR           | 20B               | B.1.1            | 2172737     | 2107026                | 29801                 | 99.659                  |
| 2019nCoV-65835 | EPI_ISL_479567      | hCoV-19/India/NIV-65835/2020     | Male   | 60         | 16-Jun          | Recovered | Pune                | GR           | 20B               | B.1.1            | 323292      | 316364                 | 29837                 | 99.779                  |
| 2019nCoV-65847 | EPI_ISL_479568      | hCoV-19/India/NIV-65847/2020     | Female | 45         | 16-Jun          | Recovered | Pune                | GR           | 20B               | B.1.1            | 69647       | 68044                  | 29819                 | 99.719                  |
| 2019nCoV-65861 | EPI_ISL_479569      | hCoV-19/India/NIV-65861/2020     | Female | 24         | 16-Jun          | Recovered | Pune                | GR           | 20B               | B.1.1            | 212877      | 202736                 | 29423                 | 98.395                  |
| 2019nCoV-65877 | EPI_ISL_479570      | hCoV-19/India/NIV-65877/2020     | Male   | 29         | 16-Jun          | Recovered | Pune                | GR           | 20B               | B.1.1            | 355650      | 267817                 | 29800                 | 99.656                  |
| 2019nCoV-65880 | EPI_ISL_479571      | hCoV-19/India/NIV-65880/2020     | Male   | 28         | 16-Jun          | Recovered | Pune                | GR           | 20B               | B.1.1            | 248198      | 242767                 | 29802                 | 99.662                  |
| SARI-4375      | EPI_ISL_479572      | hCoV-19/India/NIV-SARI-4375/2020 | Male   | 62         | 04-Apr          | Recovered | Pune                | O            | 19A               | B                | 1574248     | 849228                 | 29811                 | 99.692                  |
| SARI-4487      | EPI_ISL_479573      | hCoV-19/India/NIV-SARI-4487/2020 | Female | 75         | 12-Apr          | Recovered | Pune                | GR           | 20B               | B.1.1            | 372560      | 38838                  | 28045                 | 93.787                  |
| 2019nCoV-25949 | EPI_ISL_479657      | hCoV-19/India/NIV-25949/2020     | Male   | 75         | 09-May          | Fatal     | Pune                | G            | 20A               | B.1              | 3351730     | 3232944                | 29806                 | 99.676                  |
| 2019nCoV-26133 | EPI_ISL_479658      | hCoV-19/India/NIV-26133/2020     | Female | 57         | 12-May          | Fatal     | Pune                | GR           | 20B               | B.1.1            | 169767      | 77565                  | 29129                 | 97.412                  |
| 2019nCoV-39037 | EPI_ISL_479659      | hCoV-19/India/NIV-39037/2020     | Female | 56         | 22-May          | Recovered | Pune                | GR           | 20B               | B.1.1            | 1070919     | 654045                 | 29509                 | 98.682                  |
| 2019nCoV-64880 | EPI_ISL_479660      | hCoV-19/India/NIV-64880/2020     | Male   | 63         | 16-Jun          | Recovered | Pune                | G            | 20A               | B.1              | 95974       | 15904                  | 21109                 | 70.592                  |

Contid....

| Specimen ID     | GISAID Accession ID | Virus name                       | Gender | Age (Year) | Collection date | Outcome   | Location (District) | GISAID Clade | Next Strain Clade | Pangolin Lineage | Total Reads | Reads Utilized in IRMA | Genome Length Covered | % Genome Length Covered |
|-----------------|---------------------|----------------------------------|--------|------------|-----------------|-----------|---------------------|--------------|-------------------|------------------|-------------|------------------------|-----------------------|-------------------------|
| 2019nCoV-65819  | EPI_ISL_479661      | hCoV-19/India/NIV-65819/2020     | Female | 20         | 16-Jun          | Recovered | Pune                | O            | 20B               | B.1.1            | 1870056     | 1814228                | 29627                 | 99.077                  |
| 2019nCoV-65815  | EPI_ISL_479776      | hCoV-19/India/NIV-65815/2020     | Female | 19         | 16-Jun          | Recovered | Pune                | O            | 20B               | B.1              | 3175132     | 3103795                | 29158                 | 97.509                  |
| 2019nCoV-101459 | EPI_ISL_541681      | hCoV-19/India/MH-NIV-101459/2020 | Female | 36         | 06-Jul          | Recovered | Pune                | GR           | 20B               | B.1.1.32         | 165499      | 135246                 | 29763                 | 99.532                  |
| 2019nCoV-10418  | EPI_ISL_541682      | hCoV-19/India/MH-NIV-10418/2020  | Male   | 65         | 16-Apr          | Recovered | Pune                | GR           | 20B               | B.1.1.32         | 756280      | 706802                 | 29800                 | 99.656                  |
| 2019nCoV-10435  | EPI_ISL_541683      | hCoV-19/India/MH-NIV-10435/2020  | Male   | 43         | 16-Apr          | Recovered | Pune                | GR           | 20B               | B.1.1.32         | 1299411     | 1270916                | 29608                 | 99.013                  |
| 2019nCoV-112247 | EPI_ISL_541684      | hCoV-19/India/MH-NIV-112247/2020 | Female | 25         | 13-Jul          | Recovered | Pune                | GR           | 20B               | B.1.1.32         | 1171223     | 1043554                | 29803                 | 99.666                  |
| 2019nCoV-113454 | EPI_ISL_541685      | hCoV-19/India/MH-NIV-113454/2020 | Female | 25         | 14-Jul          | Recovered | Pune                | GR           | 20B               | B.1.1.32         | 889603      | 874290                 | 29722                 | 99.395                  |
| 2019nCoV-114444 | EPI_ISL_541686      | hCoV-19/India/MH-NIV-114444/2020 | Female | 30         | 14-Jul          | Recovered | Pune                | GR           | 20B               | B.1.1            | 19634       | 17882                  | 19756                 | 66.067                  |
| 2019nCoV-116690 | EPI_ISL_541687      | hCoV-19/India/MH-NIV-116690/2020 | Male   | 21         | 15-Jul          | Recovered | Pune                | GR           | 20B               | B.1.1.32         | 838215      | 547732                 | 29805                 | 99.672                  |
| 2019nCoV-119994 | EPI_ISL_541688      | hCoV-19/India/MH-NIV-119994/2020 | Male   | 42         | 17-Jul          | Recovered | Pune                | GR           | 20B               | B.1.1.32         | 123810      | 119148                 | 29733                 | 99.431                  |
| 2019nCoV-121164 | EPI_ISL_541689      | hCoV-19/India/MH-NIV-121164/2020 | Male   | 20         | 17-Jul          | Recovered | Pune                | GR           | 20B               | B.1.1.32         | 1568812     | 1518348                | 29812                 | 99.696                  |
| 2019nCoV-122530 | EPI_ISL_541690      | hCoV-19/India/MH-NIV-122530/2020 | Female | 42         | 18-Jul          | Recovered | Pune                | GR           | 20B               | B.1.1.32         | 1394192     | 1364144                | 29903                 | 100                     |
| 2019nCoV-123415 | EPI_ISL_541691      | hCoV-19/India/MH-NIV-123415/2020 | Male   | 67         | 18-Jul          | Recovered | Pune                | GR           | 20B               | B.1.1.32         | 577210      | 548805                 | 29800                 | 99.656                  |
| 2019nCoV-124593 | EPI_ISL_541692      | hCoV-19/India/MH-NIV-124593/2020 | Male   | 72         | 20-Jul          | Fatal     | Pune                | GR           | 20B               | B.1.1            | 317299      | 216467                 | 29803                 | 99.666                  |
| 2019nCoV-125643 | EPI_ISL_541693      | hCoV-19/India/MH-NIV-125643/2020 | Male   | 50         | 20-Jul          | Recovered | Pune                | GR           | 20B               | B.1.1.32         | 464051      | 455927                 | 29830                 | 99.756                  |
| 2019nCoV-126959 | EPI_ISL_541694      | hCoV-19/India/MH-NIV-126959/2020 | Female | 44         | 21-Jul          | Recovered | Pune                | GR           | 20B               | B.1.1.32         | 1094203     | 1077963                | 29780                 | 99.589                  |
| 2019nCoV-136271 | EPI_ISL_541695      | hCoV-19/India/MH-NIV-136271/2020 | Female | 66         | 26-Jul          | Recovered | Pune                | GR           | 20B               | B.1.1            | 1528291     | 1503341                | 29848                 | 99.816                  |
| 2019nCoV-137244 | EPI_ISL_541696      | hCoV-19/India/MH-NIV-137244/2020 | Male   | 22         | 27-Jul          | Recovered | Pune                | GR           | 20B               | B.1.1            | 1620154     | 1585377                | 29799                 | 99.652                  |

Contid...

| Specimen ID     | GISAID Accession ID | Virus name                       | Gender | Age (Year) | Collection date | Outcome   | Location (District) | GISAID Clade | Next Strain Clade | Pangolin Lineage | Total Reads | Reads Utilized in IRMA | Genome Length Covered | % Genome Length Covered |
|-----------------|---------------------|----------------------------------|--------|------------|-----------------|-----------|---------------------|--------------|-------------------|------------------|-------------|------------------------|-----------------------|-------------------------|
| 2019nCoV-13768  | EPI_ISL_541697      | hCoV-19/India/MH-NIV-13768/2020  | Female | 55         | 23-Apr          | Recovered | Pune                | GR           | 20B               | B.1.1.32         | 1184326     | 1157745                | 29806                 | 99.676                  |
| 2019nCoV-13804  | EPI_ISL_541698      | hCoV-19/India/MH-NIV-13804/2020  | Male   | 19         | 23-Apr          | Recovered | Pune                | GR           | 20B               | B.1.1.32         | 1380546     | 1317563                | 29796                 | 99.642                  |
| 2019nCoV-138100 | EPI_ISL_541699      | hCoV-19/India/MH-NIV-138100/2020 | Female | 51         | 27-Jul          | Recovered | Pune                | GR           | 20B               | B.1.1.32         | 609161      | 592476                 | 29789                 | 99.619                  |
| 2019nCoV-13868  | EPI_ISL_541700      | hCoV-19/India/MH-NIV-13868/2020  | Male   | 42         | 23-Apr          | Recovered | Pune                | GR           | 20B               | B.1.1.32         | 1370187     | 547417                 | 29808                 | 99.682                  |
| 2019nCoV-150015 | EPI_ISL_541701      | hCoV-19/India/MH-NIV-150015/2020 | Male   | 74         | 04-Aug          | Recovered | Pune                | GR           | 20B               | B.1.1.32         | 2494442     | 1938620                | 29767                 | 99.545                  |
| 2019nCoV-150596 | EPI_ISL_541702      | hCoV-19/India/MH-NIV-150596/2020 | Male   | 40         | 05-Aug          | Recovered | Pune                | GR           | 20B               | B.1.1.32         | 592187      | 522633                 | 29788                 | 99.615                  |
| 2019nCoV-152698 | EPI_ISL_541703      | hCoV-19/India/MH-NIV-152698/2020 | Female | 17         | 06-Aug          | Recovered | Pune                | GR           | 20B               | B.1.1.32         | 40577       | 36895                  | 28968                 | 96.873                  |
| 2019nCoV-153805 | EPI_ISL_541704      | hCoV-19/India/MH-NIV-153805/2020 | Female | 8          | 07-Aug          | Recovered | Pune                | GR           | 20B               | B.1.1.32         | 1066395     | 862760                 | 29804                 | 99.669                  |
| 2019nCoV-155669 | EPI_ISL_541705      | hCoV-19/India/MH-NIV-155669/2020 | Male   | 38         | 08-Aug          | Recovered | Pune                | GR           | 20B               | B.1.1.31         | 1518447     | 44848                  | 29515                 | 98.702                  |
| 2019nCoV-156143 | EPI_ISL_541706      | hCoV-19/India/MH-NIV-156143/2020 | Female | 60         | 08-Aug          | Recovered | Pune                | GR           | 20B               | B.1.1.32         | 2939107     | 471040                 | 29802                 | 99.662                  |
| 2019nCoV-157478 | EPI_ISL_541707      | hCoV-19/India/MH-NIV-157478/2020 | Female | 65         | 10-Aug          | Recovered | Pune                | GR           | 20B               | B.1.1.32         | 1332119     | 1304439                | 29800                 | 99.656                  |
| 2019nCoV-157939 | EPI_ISL_541708      | hCoV-19/India/MH-NIV-157939/2020 | Male   | 23         | 10-Aug          | Recovered | Pune                | GR           | 20B               | B.1.1.32         | 128853      | 104012                 | 29644                 | 99.134                  |
| 2019nCoV-159293 | EPI_ISL_541709      | hCoV-19/India/MH-NIV-159293/2020 | Female | 48         | 11-Aug          | Recovered | Pune                | GR           | 20B               | B.1.1            | 2891141     | 2551600                | 28684                 | 95.923                  |
| 2019nCoV-159610 | EPI_ISL_541710      | hCoV-19/India/MH-NIV-159610/2020 | Male   | 32         | 11-Aug          | Recovered | Pune                | GR           | 20B               | B.1.1.32         | 259558      | 225894                 | 29743                 | 99.465                  |
| 2019nCoV-164425 | EPI_ISL_541711      | hCoV-19/India/MH-NIV-164425/2020 | Male   | 12         | 14-Aug          | Recovered | Pune                | GR           | 20B               | B.1.1.32         | 921594      | 898498                 | 29809                 | 99.686                  |
| 2019nCoV-171235 | EPI_ISL_541712      | hCoV-19/India/MH-NIV-171235/2020 | Female | 13         | 19-Aug          | Recovered | Pune                | GR           | 20B               | B.1.1.32         | 384077      | 376573                 | 29409                 | 98.348                  |
| 2019nCoV-172607 | EPI_ISL_541713      | hCoV-19/India/MH-NIV-172607/2020 | Female | 50         | 20-Aug          | Recovered | Pune                | GR           | 20B               | B.1.1.32         | 1130374     | 1086381                | 29804                 | 99.669                  |
| 2019nCoV-173797 | EPI_ISL_541714      | hCoV-19/India/MH-NIV-173797/2020 | Male   | 50         | 21-Aug          | Recovered | Pune                | GR           | 20B               | B.1.1.32         | 2183925     | 2140528                | 29804                 | 99.669                  |

Contid...

| Specimen ID     | GISAID Accession ID | Virus name                       | Gender | Age (Year) | Collection date | Outcome   | Location (District) | GISAID Clade | Next Strain Clade | Pangolin Lineage | Total Reads | Reads Utilized in IRMA | Genome Length Covered | % Genome Length Covered |
|-----------------|---------------------|----------------------------------|--------|------------|-----------------|-----------|---------------------|--------------|-------------------|------------------|-------------|------------------------|-----------------------|-------------------------|
| 2019nCoV-174910 | EPI_ISL_541715      | hCoV-19/India/MH-NIV-174910/2020 | Male   | 14         | 23-Aug          | Recovered | Pune                | GR           | 20B               | B.1.1            | 1827253     | 1806459                | 29757                 | 99.512                  |
| 2019nCoV-176041 | EPI_ISL_541716      | hCoV-19/India/MH-NIV-176041/2020 | Male   | 59         | 24-Aug          | Recovered | Pune                | GR           | 20B               | B.1.1.32         | 1401524     | 1297190                | 29803                 | 99.666                  |
| 2019nCoV-176352 | EPI_ISL_541717      | hCoV-19/India/MH-NIV-176352/2020 | Female | 22         | 24-Aug          | Recovered | Pune                | GR           | 20B               | B.1.1.32         | 2682515     | 2643441                | 29807                 | 99.679                  |
| 2019nCoV-183948 | EPI_ISL_541718      | hCoV-19/India/MH-NIV-183948/2020 | Female | 40         | 28-Aug          | Recovered | Pune                | GR           | 20B               | B.1.1.32         | 838457      | 777406                 | 29805                 | 99.672                  |
| 2019nCoV-185628 | EPI_ISL_541719      | hCoV-19/India/MH-NIV-185628/2020 | Male   | 27         | 29-Aug          | Recovered | Pune                | GR           | 20B               | B.1.1            | 152892      | 119395                 | 29622                 | 99.06                   |
| 2019nCoV-186959 | EPI_ISL_541720      | hCoV-19/India/MH-NIV-186959/2020 | Female | 15         | 31-Aug          | Recovered | Pune                | GR           | 20B               | B.1.1.32         | 1066345     | 1044818                | 29804                 | 99.669                  |
| 2019nCoV-187756 | EPI_ISL_541721      | hCoV-19/India/MH-NIV-187756/2020 | Female | 56         | 31-Aug          | Recovered | Pune                | GR           | 20B               | B.1.1.32         | 1318656     | 1298644                | 29804                 | 99.669                  |
| 2019nCoV-19080  | EPI_ISL_541722      | hCoV-19/India/MH-NIV-19080/2020  | Male   | 42         | 01-May          | Recovered | Pune                | GR           | 20B               | B.1.1            | 84939       | 24239                  | 26188                 | 87.576                  |
| 2019nCoV-191205 | EPI_ISL_541723      | hCoV-19/India/MH-NIV-191205/2020 | Female | 45         | 02-Sep          | Recovered | Pune                | GR           | 20B               | B.1.1.32         | 494406      | 469713                 | 29800                 | 99.656                  |
| 2019nCoV-192922 | EPI_ISL_541724      | hCoV-19/India/MH-NIV-192922/2020 | Male   | 42         | 03-Sep          | Recovered | Pune                | GR           | 20B               | B.1.1.32         | 1615899     | 1590563                | 29800                 | 99.656                  |
| 2019nCoV-52010  | EPI_ISL_541725      | hCoV-19/India/MH-NIV-52010/2020  | Female | 29         | 04-Jun          | Recovered | Pune                | GR           | 20B               | B.1.1.32         | 3486456     | 3292007                | 29805                 | 99.672                  |
| 2019nCoV-57622  | EPI_ISL_541726      | hCoV-19/India/MH-NIV-57622/2020  | Female | 38         | 10-Jun          | Recovered | Pune                | GR           | 20B               | B.1.1.32         | 3883074     | 3760169                | 29803                 | 99.666                  |
| 2019nCoV-57774  | EPI_ISL_541727      | hCoV-19/India/MH-NIV-57774/2020  | Male   | 25         | 10-Jun          | Recovered | Pune                | GR           | 20B               | B.1.1.32         | 293050      | 160911                 | 29796                 | 99.642                  |
| 2019nCoV-58210  | EPI_ISL_541728      | hCoV-19/India/MH-NIV-58210/2020  | Female | 63         | 10-Jun          | Recovered | Pune                | GR           | 20B               | B.1.1.32         | 765556      | 751813                 | 29813                 | 99.699                  |
| 2019nCoV-59437  | EPI_ISL_541729      | hCoV-19/India/MH-NIV-59437/2020  | Male   | 41         | 11-Jun          | Recovered | Pune                | GR           | 20B               | B.1.1.32         | 1773817     | 1362224                | 29801                 | 99.659                  |
| 2019nCoV-59448  | EPI_ISL_541730      | hCoV-19/India/MH-NIV-59448/2020  | Female | 58         | 11-Jun          | Recovered | Pune                | GR           | 20B               | B.1.1.32         | 2853916     | 2221989                | 29795                 | 99.639                  |
| 2019nCoV-60033  | EPI_ISL_541731      | hCoV-19/India/MH-NIV-60033/2020  | Female | 60         | 12-Jun          | Recovered | Pune                | GR           | 20B               | B.1.1.32         | 883452      | 867186                 | 29804                 | 99.669                  |
| 2019nCoV-60205  | EPI_ISL_541732      | hCoV-19/India/MH-NIV-60205/2020  | Male   | 13         | 12-Jun          | Recovered | Pune                | GH           | 20A               | B.1              | 158209      | 37346                  | 28024                 | 93.716                  |

Contid...

| Specimen ID    | GISAID Accession ID | Virus name                      | Gender | Age (Year) | Collection date | Outcome   | Location (District) | GISAID Clade | Next Strain Clade | Pangolin Lineage | Total Reads | Reads Utilized in IRMA | Genome Length Covered | % Genome Length Covered |
|----------------|---------------------|---------------------------------|--------|------------|-----------------|-----------|---------------------|--------------|-------------------|------------------|-------------|------------------------|-----------------------|-------------------------|
| 2019nCoV-69925 | EPI_ISL_541733      | hCoV-19/India/MH-NIV-69925/2020 | Male   | 9          | 19-Jun          | Recovered | Pune                | GR           | 20B               | B.1.1.32         | 1356077     | 420520                 | 29804                 | 99.669                  |
| 2019nCoV-71548 | EPI_ISL_541734      | hCoV-19/India/MH-NIV-71548/2020 | Female | 75         | 20-Jun          | Recovered | Pune                | GR           | 20B               | B.1.1.32         | 2875134     | 2719854                | 29804                 | 99.669                  |
| 2019nCoV-71791 | EPI_ISL_541735      | hCoV-19/India/MH-NIV-71791/2020 | Male   | 23         | 20-Jun          | Recovered | Pune                | GR           | 20B               | B.1.1            | 2427509     | 2318880                | 29846                 | 99.809                  |
| 2019nCoV-72638 | EPI_ISL_541736      | hCoV-19/India/MH-NIV-72638/2020 | Male   | 40         | 20-Jun          | Recovered | Pune                | GR           | 20B               | B.1.1.32         | 3034582     | 2908617                | 29821                 | 99.726                  |
| 2019nCoV-73012 | EPI_ISL_541737      | hCoV-19/India/MH-NIV-73012/2020 | Male   | 27         | 22-Jun          | Recovered | Pune                | GR           | 20B               | B.1.1            | 2907339     | 2770245                | 29819                 | 99.719                  |
| 2019nCoV-73500 | EPI_ISL_541738      | hCoV-19/India/MH-NIV-73500/2020 | Male   | 35         | 22-Jun          | Recovered | Pune                | GR           | 20B               | B.1.1.32         | 773140      | 644305                 | 29803                 | 99.666                  |
| 2019nCoV-74837 | EPI_ISL_541739      | hCoV-19/India/MH-NIV-74837/2020 | Male   | 27         | 22-Jun          | Recovered | Pune                | GR           | 20B               | B.1.1.32         | 2778274     | 2726757                | 29803                 | 99.666                  |
| 2019nCoV-74916 | EPI_ISL_541740      | hCoV-19/India/MH-NIV-74916/2020 | Female | 31         | 03-Jul          | Recovered | Pune                | GR           | 20B               | B.1.1.32         | 503558      | 484517                 | 29804                 | 99.669                  |
| 2019nCoV-76773 | EPI_ISL_541741      | hCoV-19/India/MH-NIV-76773/2020 | Male   | 31         | 23-Jun          | Recovered | Pune                | GR           | 20B               | B.1.1.32         | 744325      | 697413                 | 29804                 | 99.669                  |
| 2019nCoV-77268 | EPI_ISL_541742      | hCoV-19/India/MH-NIV-77268/2020 | Male   | 4          | 23-Jun          | Recovered | Pune                | GR           | 20B               | B.1.1.32         | 6193127     | 6040702                | 29806                 | 99.676                  |
| 2019nCoV-77702 | EPI_ISL_541743      | hCoV-19/India/MH-NIV-77702/2020 | Female | 40         | 24-Jun          | Recovered | Pune                | GR           | 20B               | B.1.1.32         | 2864804     | 2454904                | 29818                 | 99.716                  |
| 2019nCoV-78532 | EPI_ISL_541744      | hCoV-19/India/MH-NIV-78532/2020 | Male   | 38         | 24-Jun          | Recovered | Pune                | GR           | 20B               | B.1.1            | 207363      | 189566                 | 29767                 | 99.545                  |
| 2019nCoV-80231 | EPI_ISL_541745      | hCoV-19/India/MH-NIV-80231/2020 | Male   | 60         | 25-Jun          | Recovered | Pune                | GR           | 20B               | B.1.1            | 73719       | 33408                  | 29535                 | 98.769                  |
| 2019nCoV-80896 | EPI_ISL_541746      | hCoV-19/India/MH-NIV-80896/2020 | Male   | 27         | 25-Jun          | Recovered | Pune                | GR           | 20B               | B.1.1.32         | 916679      | 835148                 | 29779                 | 99.585                  |
| 2019nCoV-81270 | EPI_ISL_541747      | hCoV-19/India/MH-NIV-81270/2020 | Female | 22         | 25-Jun          | Recovered | Pune                | GR           | 20B               | B.1.1            | 4047546     | 532395                 | 29851                 | 99.826                  |
| 2019nCoV-96428 | EPI_ISL_541748      | hCoV-19/India/MH-NIV-96428/2020 | Male   | 50         | 03-Jul          | Recovered | Pune                | GR           | 20B               | B.1.1.32         | 640606      | 610275                 | 29796                 | 99.642                  |
| 2019nCoV-97052 | EPI_ISL_541749      | hCoV-19/India/MH-NIV-97052/2020 | Female | 53         | 03-Jul          | Recovered | Pune                | GR           | 20B               | B.1.1.32         | 100058      | 44755                  | 29380                 | 98.251                  |
| 2019nCoV-99083 | EPI_ISL_541750      | hCoV-19/India/MH-NIV-99083/2020 | Female | 24         | 04-Jul          | Recovered | Pune                | GR           | 20B               | B.1.1.32         | 41469       | 7992                   | 29081                 | 97.251                  |

Contid...

| Specimen ID     | GISAID Accession ID | Virus name                       | Gender | Age (Year) | Collection date | Outcome   | Location (District) | GISAID Clade | Next Strain Clade | Pangolin Lineage | Total Reads | Reads Utilized in IRMA | Genome Length Covered | % Genome Length Covered |
|-----------------|---------------------|----------------------------------|--------|------------|-----------------|-----------|---------------------|--------------|-------------------|------------------|-------------|------------------------|-----------------------|-------------------------|
| 2019nCoV-99913  | EPI_ISL_541751      | hCoV-19/India/MH-NIV-99913/2020  | Female | 31         | 06-Jul          | Recovered | Pune                | G            | 20A               | B.1              | 1606799     | 1172561                | 29804                 | 99.669                  |
| 2019nCoV-191373 | EPI_ISL_577639      | hCoV-19/India/MH-NIV-191373/2020 | Male   | 25         | 02-Sep          | Recovered | Pune                | GR           | 20B               | B.1.1            | 57771       | 26051                  | 28479                 | 95.238                  |
| 2019nCoV-226874 | EPI_ISL_577640      | hCoV-19/India/MH-NIV-226874/2020 | Female | 42         | 25-Sep          | Recovered | Pune                | GR           | 20B               | B.1.1.32         | 535610      | 505924                 | 29779                 | 99.585                  |
| 2019nCoV-206486 | EPI_ISL_577641      | hCoV-19/India/MH-NIV-206486/2020 | Male   | 25         | 10-Sep          | Recovered | Pune                | GR           | 20B               | B.1.1            | 285705      | 208957                 | 28909                 | 96.676                  |
| 2019nCoV-206956 | EPI_ISL_577642      | hCoV-19/India/MH-NIV-206956/2020 | Male   | 44         | 11-Sep          | Recovered | Pune                | GR           | 20B               | B.1.1.32         | 115054      | 102845                 | 29047                 | 97.137                  |
| 2019nCoV-212454 | EPI_ISL_577643      | hCoV-19/India/MH-NIV-212454/2020 | Male   | 19         | 15-Sep          | Recovered | Pune                | GR           | 20B               | B.1.1.32         | 516606      | 360350                 | 29528                 | 98.746                  |
| 2019nCoV-213875 | EPI_ISL_577644      | hCoV-19/India/MH-NIV-213875/2020 | Male   | 54         | 16-Sep          | Recovered | Pune                | GR           | 20B               | B.1.1            | 196325      | 104822                 | 29779                 | 99.585                  |
| 2019nCoV-215370 | EPI_ISL_577645      | hCoV-19/India/MH-NIV-215370/2020 | Male   | 19         | 16-Sep          | Recovered | Pune                | GR           | 20B               | B.1.1.32         | 1219271     | 298485                 | 29779                 | 99.585                  |
| 2019nCoV-214788 | EPI_ISL_577646      | hCoV-19/India/MH-NIV-214788/2020 | Male   | 49         | 15-Sep          | Recovered | Pune                | GR           | 20B               | B.1.1            | 957151      | 760488                 | 29124                 | 97.395                  |
| 2019nCoV-223127 | EPI_ISL_577647      | hCoV-19/India/MH-NIV-223127/2020 | Male   | 23         | 23-Sep          | Recovered | Pune                | GR           | 20B               | B.1.1.32         | 1111764     | 1009296                | 29779                 | 99.585                  |
| 2019nCoV-210557 | EPI_ISL_577648      | hCoV-19/India/MH-NIV-210557/2020 | Female | 60         | 14-Sep          | Recovered | Pune                | GR           | 20B               | B.1.1.32         | 1421851     | 924958                 | 29779                 | 99.585                  |
| 2019nCoV-223537 | EPI_ISL_577649      | hCoV-19/India/MH-NIV-223537/2020 | Female | 22         | 23-Sep          | Recovered | Pune                | GR           | 20B               | B.1.1.32         | 873737      | 240565                 | 29779                 | 99.585                  |
| 2019nCoV-221309 | EPI_ISL_577650      | hCoV-19/India/MH-NIV-221309/2020 | Male   | 34         | 22-Sep          | Recovered | Pune                | GR           | 20B               | B.1.1.32         | 1229298     | 1156029                | 29337                 | 98.107                  |
| 2019nCoV-221624 | EPI_ISL_577651      | hCoV-19/India/MH-NIV-221624/2020 | Male   | 32         | 21-Sep          | Recovered | Pune                | GR           | 20B               | B.1.1.32         | 1416973     | 928904                 | 29779                 | 99.585                  |
| 2019nCoV-222131 | EPI_ISL_577652      | hCoV-19/India/MH-NIV-222131/2020 | Female | 63         | 22-Sep          | Recovered | Pune                | GR           | 20B               | B.1.1.32         | 1349871     | 914341                 | 29779                 | 99.585                  |
| 2019nCoV-220751 | EPI_ISL_577653      | hCoV-19/India/MH-NIV-220751/2020 | Female | 45         | 21-Sep          | Recovered | Pune                | GR           | 20B               | B.1.1            | 181108      | 136666                 | 28761                 | 96.181                  |
| 2019nCoV-219744 | EPI_ISL_577654      | hCoV-19/India/MH-NIV-219744/2020 | Male   | 21         | 20-Sep          | Recovered | Pune                | GR           | 20B               | B.1.1            | 250231      | 156785                 | 27805                 | 92.984                  |
| 2019nCoV-220301 | EPI_ISL_577655      | hCoV-19/India/MH-NIV-220301/2020 | Female | 46         | 21-Sep          | Recovered | Pune                | GR           | 20B               | B.1.1.32         | 477244      | 425127                 | 29663                 | 99.197                  |

Contid...

| Specimen ID     | GISAID Accession ID | Virus name                       | Gender | Age (Year) | Collection date | Outcome   | Location (District) | GISAID Clade | Next Strain Clade | Pangolin Lineage | Total Reads | Reads Utilized in IRMA | Genome Length Covered | % Genome Length Covered |
|-----------------|---------------------|----------------------------------|--------|------------|-----------------|-----------|---------------------|--------------|-------------------|------------------|-------------|------------------------|-----------------------|-------------------------|
| 2019nCoV-218275 | EPI_ISL_577656      | hCoV-19/India/MH-NIV-218275/2020 | Female | 48         | 19-Sep          | Recovered | Pune                | GR           | 20B               | B.1.1.32         | 734000      | 654642                 | 29779                 | 99.585                  |
| 2019nCoV-217910 | EPI_ISL_577657      | hCoV-19/India/MH-NIV-217910/2020 | Male   | 31         | 18-Sep          | Recovered | Pune                | GR           | 20B               | B.1.1            | 927107      | 784780                 | 29779                 | 99.585                  |
| 2019nCoV-223126 | EPI_ISL_577658      | hCoV-19/India/MH-NIV-223126/2020 | Female | 50         | 23-Sep          | Recovered | Pune                | GR           | 20B               | B.1.1.32         | 1810298     | 932605                 | 29779                 | 99.585                  |
| 2019nCoV-216133 | EPI_ISL_577659      | hCoV-19/India/MH-NIV-216133/2020 | Female | 28         | 18-Sep          | Recovered | Pune                | GR           | 20B               | B.1.1.32         | 1758749     | 938822                 | 29779                 | 99.585                  |
| 2019nCoV-216500 | EPI_ISL_577660      | hCoV-19/India/MH-NIV-216500/2020 | Male   | 47         | 18-Sep          | Recovered | Pune                | GR           | 20B               | B.1.1            | 1098559     | 1018626                | 29779                 | 99.585                  |
| 2019nCoV-207705 | EPI_ISL_577661      | hCoV-19/India/MH-NIV-207705/2020 | Male   | 32         | 11-Sep          | Recovered | Pune                | GH           | 20A               | B.1.113          | 1379624     | 944265                 | 29699                 | 99.318                  |
| 2019nCoV-216641 | EPI_ISL_577662      | hCoV-19/India/MH-NIV-216641/2020 | Male   | 64         | 18-Sep          | Recovered | Pune                | GR           | 20B               | B.1.1            | 1741496     | 944144                 | 29779                 | 99.585                  |
| 2019nCoV-209697 | EPI_ISL_577663      | hCoV-19/India/MH-NIV-209697/2020 | Female | 53         | 12-Sep          | Recovered | Pune                | GR           | 20B               | B.1.1.32         | 1212456     | 507391                 | 29779                 | 99.585                  |
| 2019nCoV-216244 | EPI_ISL_577664      | hCoV-19/India/MH-NIV-216244/2020 | Male   | 32         | 17-Sep          | Recovered | Pune                | GR           | 20B               | B.1.1.32         | 34799912    | 938681                 | 29777                 | 99.579                  |
| 2019nCoV-216880 | EPI_ISL_577665      | hCoV-19/India/MH-NIV-216880/2020 | Male   | 21         | 18-Sep          | Recovered | Pune                | GR           | 20B               | B.1.1.32         | 176071      | 164390                 | 29702                 | 99.328                  |
| 2019nCoV-206415 | EPI_ISL_577666      | hCoV-19/India/MH-NIV-206415/2020 | Female | 63         | 10-Sep          | Recovered | Pune                | GR           | 20B               | B.1.1            | 178393      | 112130                 | 28889                 | 96.609                  |
| 2019nCoV-206926 | EPI_ISL_577667      | hCoV-19/India/MH-NIV-206926/2020 | Male   | 32         | 10-Sep          | Recovered | Pune                | GR           | 20B               | B.1.1            | 61677       | 46399                  | 28482                 | 95.248                  |
| 2019nCoV-207312 | EPI_ISL_577668      | hCoV-19/India/MH-NIV-207312/2020 | Male   | 48         | 11-Sep          | Recovered | Pune                | GR           | 20B               | B.1.1.32         | 110471      | 89550                  | 29416                 | 98.371                  |
| 2019nCoV-209852 | EPI_ISL_577669      | hCoV-19/India/MH-NIV-209852/2020 | Female | 50         | 13-Sep          | Recovered | Pune                | GR           | 20B               | B.1.1            | 1334902     | 938208                 | 28555                 | 95.492                  |
| 2019nCoV-210934 | EPI_ISL_577670      | hCoV-19/India/MH-NIV-210934/2020 | Female | 65         | 14-Sep          | Recovered | Pune                | GR           | 20B               | B.1.1.32         | 1063269     | 903673                 | 29779                 | 99.585                  |
| 2019nCoV-185989 | EPI_ISL_577671      | hCoV-19/India/MH-NIV-185989/2020 | Male   | 35         | 29-Aug          | Recovered | Pune                | GR           | 20B               | B.1.1.32         | 102653      | 56013                  | 28120                 | 94.037                  |
| 2019nCoV-197096 | EPI_ISL_577672      | hCoV-19/India/MH-NIV-197096/2020 | Male   | 50         | 05-Sep          | Recovered | Pune                | GH           | 20A               | B.1.113          | 2347394     | 938748                 | 29779                 | 99.585                  |
| 2019nCoV-203951 | EPI_ISL_577673      | hCoV-19/India/MH-NIV-203951/2020 | Female | 34         | 09-Sep          | Recovered | Pune                | G            | 20B               | B.1.1            | 34022       | 29374                  | 26364                 | 88.165                  |

Contid....

| Specimen ID     | GISAID Accession ID | Virus name                       | Gender | Age (Year) | Collection date | Outcome   | Location (District) | GISAID Clade | Next Strain Clade | Pangolin Lineage | Total Reads | Reads Utilized in IRMA | Genome Length Covered | % Genome Length Covered |
|-----------------|---------------------|----------------------------------|--------|------------|-----------------|-----------|---------------------|--------------|-------------------|------------------|-------------|------------------------|-----------------------|-------------------------|
| 2019nCoV-208140 | EPI_ISL_577674      | hCoV-19/India/MH-NIV-208140/2020 | Female | 23         | 11-Sep          | Recovered | Pune                | GR           | 20B               | B.1.1            | 559307      | 46087                  | 26922                 | 90.031                  |
| 2019nCoV-212999 | EPI_ISL_577675      | hCoV-19/India/MH-NIV-212999/2020 | Male   | 32         | 15-Sep          | Recovered | Pune                | GR           | 20B               | B.1.1            | 946066      | 837662                 | 29249                 | 97.813                  |
| 2019nCoV-214342 | EPI_ISL_577676      | hCoV-19/India/MH-NIV-214342/2020 | Female | 4          | 16-Sep          | Recovered | Pune                | GR           | 20B               | B.1.1.32         | 1196856     | 1129255                | 29583                 | 98.93                   |
| 2019nCoV-229804 | EPI_ISL_577677      | hCoV-19/India/MH-NIV-229804/2020 | Female | 14         | 29-Sep          | Recovered | Pune                | GR           | 20B               | B.1.1            | 590038      | 476168                 | 29779                 | 99.585                  |
| 2019nCoV-217242 | EPI_ISL_577678      | hCoV-19/India/MH-NIV-217242/2020 | Male   | 32         | 17-Sep          | Recovered | Pune                | GR           | 20B               | B.1.1            | 547265      | 403382                 | 29670                 | 99.221                  |
| 2019nCoV-229467 | EPI_ISL_577679      | hCoV-19/India/MH-NIV-229467/2020 | Male   | 26         | 28-Sep          | Recovered | Pune                | GR           | 20B               | B.1.1.32         | 1385055     | 941344                 | 29779                 | 99.585                  |
| 2019nCoV-229468 | EPI_ISL_577680      | hCoV-19/India/MH-NIV-229468/2020 | Male   | 52         | 28-Sep          | Recovered | Pune                | GR           | 20B               | B.1.1.32         | 1325329     | 951710                 | 29779                 | 99.585                  |
| 2019nCoV-229461 | EPI_ISL_577681      | hCoV-19/India/MH-NIV-229461/2020 | Male   | 18         | 28-Sep          | Recovered | Pune                | GR           | 20B               | B.1.1.32         | 747579      | 673585                 | 29779                 | 99.585                  |
| 2019nCoV-229428 | EPI_ISL_577682      | hCoV-19/India/MH-NIV-229428/2020 | Male   | 32         | 29-Sep          | Recovered | Pune                | G            | 20A               | B.1              | 120052      | 103201                 | 29562                 | 98.86                   |
| 2019nCoV-229512 | EPI_ISL_577683      | hCoV-19/India/MH-NIV-229512/2020 | Female | 39         | 28-Sep          | Recovered | Pune                | GH           | 20A               | B.1.113          | 731090      | 684966                 | 29779                 | 99.585                  |
| 2019nCoV-229539 | EPI_ISL_577684      | hCoV-19/India/MH-NIV-229539/2020 | Male   | 45         | 28-Sep          | Recovered | Pune                | GR           | 20B               | B.1.1.32         | 16960911    | 946711                 | 29779                 | 99.585                  |
| 2019nCoV-229542 | EPI_ISL_577685      | hCoV-19/India/MH-NIV-229542/2020 | Male   | 18         | 28-Sep          | Recovered | Pune                | GR           | 20B               | B.1.1.32         | 1361134     | 865157                 | 29779                 | 99.585                  |
| 2019nCoV-229545 | EPI_ISL_577686      | hCoV-19/India/MH-NIV-229545/2020 | Female | 39         | 28-Sep          | Recovered | Pune                | GR           | 20B               | B.1.1.32         | 1786580     | 873138                 | 29779                 | 99.585                  |
| 2019nCoV-229555 | EPI_ISL_577687      | hCoV-19/India/MH-NIV-229555/2020 | Female | 18         | 28-Sep          | Recovered | Pune                | GH           | 20A               | B.1.113          | 952136      | 884868                 | 29040                 | 97.114                  |
| 2019nCoV-229566 | EPI_ISL_577688      | hCoV-19/India/MH-NIV-229566/2020 | Male   | 23         | 28-Sep          | Recovered | Pune                | GR           | 20B               | B.1.1            | 1533439     | 834957                 | 29494                 | 98.632                  |
| 2019nCoV-229576 | EPI_ISL_577689      | hCoV-19/India/MH-NIV-229576/2020 | Female | 35         | 28-Sep          | Recovered | Pune                | GR           | 20B               | B.1.1.32         | 2930566     | 936571                 | 29779                 | 99.585                  |
| 2019nCoV-229597 | EPI_ISL_577690      | hCoV-19/India/MH-NIV-229597/2020 | Female | 33         | 28-Sep          | Recovered | Pune                | GR           | 20B               | B.1.1.32         | 1319625     | 904349                 | 29779                 | 99.585                  |
| 2019nCoV-229622 | EPI_ISL_577691      | hCoV-19/India/MH-NIV-229622/2020 | Female | 18         | 28-Sep          | Recovered | Pune                | GR           | 20B               | B.1.1.32         | 1506739     | 578794                 | 29771                 | 99.559                  |

Contid...



| Specimen ID       | GISAID Accession ID | Virus name                         | Gender | Age (Year) | Collection date | Outcome   | Location (District) | GISAID Clade | Next Strain Clade | Pangolin Lineage | Total Reads | Reads Utilized in IRMA | Genome Length Covered | % Genome Length Covered |
|-------------------|---------------------|------------------------------------|--------|------------|-----------------|-----------|---------------------|--------------|-------------------|------------------|-------------|------------------------|-----------------------|-------------------------|
| 2019nCoV-229643   | EPI_ISL_577692      | hCoV-19/India/MH-NIV-229643/2020   | Female | 62         | 29-Sep          | Recovered | Pune                | GR           | 20B               | B.1.1.32         | 3253358     | 937147                 | 29779                 | 99.585                  |
| 2019nCoV-229644   | EPI_ISL_577693      | hCoV-19/India/MH-NIV-229644/2020   | Male   | 64         | 29-Sep          | Recovered | Pune                | GR           | 20B               | B.1.1.32         | 2238553     | 950307                 | 29779                 | 99.585                  |
| 2019nCoV-229656   | EPI_ISL_577694      | hCoV-19/India/MH-NIV-229656/2020   | Male   | 46         | 29-Sep          | Recovered | Pune                | GR           | 20B               | B.1.1            | 1886738     | 896154                 | 29384                 | 98.264                  |
| 2019nCoV-229665   | EPI_ISL_577695      | hCoV-19/India/MH-NIV-229665/2020   | Female | 16         | 29-Sep          | Recovered | Pune                | GR           | 20B               | B.1.1            | 2832617     | 914281                 | 29779                 | 99.585                  |
| 2019nCoV-229684   | EPI_ISL_577696      | hCoV-19/India/MH-NIV-229684/2020   | Male   | 17         | 28-Sep          | Recovered | Pune                | GR           | 20B               | B.1.1            | 2811885     | 836055                 | 29366                 | 98.204                  |
| 2019nCoV-229699   | EPI_ISL_577697      | hCoV-19/India/MH-NIV-229699/2020   | Female | 22         | 29-Sep          | Recovered | Pune                | G            | 20A               | B.1.80           | 2793603     | 915549                 | 28930                 | 96.746                  |
| 2019nCoV-229715   | EPI_ISL_577698      | hCoV-19/India/MH-NIV-229715/2020   | Female | 31         | 29-Sep          | Recovered | Pune                | GR           | 20B               | B.1.1.32         | 2583006     | 945602                 | 29774                 | 99.569                  |
| 2019nCoV-229717   | EPI_ISL_577699      | hCoV-19/India/MH-NIV-229717/2020   | Male   | 7          | 29-Sep          | Recovered | Pune                | GR           | 20B               | B.1.1.32         | 2067967     | 868947                 | 29779                 | 99.585                  |
| 2019nCoV-229720   | EPI_ISL_577700      | hCoV-19/India/MH-NIV-229720/2020   | Female | 4          | 29-Sep          | Recovered | Pune                | G            | 20A               | B.1.80           | 2721776     | 940761                 | 29779                 | 99.585                  |
| 2019nCoV-229771   | EPI_ISL_577701      | hCoV-19/India/MH-NIV-229771/2020   | Male   | 30         | 29-Sep          | Recovered | Pune                | GR           | 20B               | B.1.1.32         | 2795262     | 818473                 | 29729                 | 99.418                  |
| 2019nCoV-229912   | EPI_ISL_577702      | hCoV-19/India/MH-NIV-229912/2020   | Male   | 29         | 28-Sep          | Recovered | Pune                | GH           | 20A               | B.1.113          | 977963      | 893095                 | 29779                 | 99.585                  |
| 2019nCoV-209851   | EPI_ISL_577703      | hCoV-19/India/MH-NIV-209851/2020   | Male   | 25         | 13-Sep          | Recovered | Pune                | GR           | 20B               | B.1              | 439235      | 315266                 | 27776                 | 92.887                  |
| 2019nCoV-206715   | EPI_ISL_577704      | hCoV-19/India/MH-NIV-206715/2020   | Male   | 79         | 11-Sep          | Recovered | Pune                | GR           | 20B               | B.1.1.32         | 2527298     | 585744                 | 29779                 | 99.585                  |
| 2019nCoV-211414   | EPI_ISL_577705      | hCoV-19/India/MH-NIV-211414/2020   | Female | 57         | 14-Sep          | Recovered | Pune                | GR           | 20B               | B.1.1.32         | 3488666     | 927997                 | 29779                 | 99.585                  |
| 2019nCoV-227343   | EPI_ISL_577706      | hCoV-19/India/MH-NIV-227343/2020   | Female | 24         | 26-Sep          | Recovered | Pune                | GR           | 20B               | B.1.1.31         | 3126163     | 807462                 | 29256                 | 97.836                  |
| 2019nCoV-QC-1459  | EPI_ISL_577707      | hCoV-19/India/MH-NIV-QC-1459/2020  | Male   | 36         | 14-Aug          | Recovered | Pune                | GR           | 20B               | B.1.1            | 2118412     | 847402                 | 29779                 | 99.585                  |
| 2019nCoV-206457-1 | EPI_ISL_577708      | hCoV-19/India/MH-NIV-206457-1/2020 | Female | 26         | 10-Sep          | Recovered | Pune                | G            | 20A               | B.1              | 1594929     | 9003                   | 28419                 | 95.037                  |
| 2019nCoV-229898   | EPI_ISL_577709      | hCoV-19/India/MH-NIV-229898/2020   | Male   | 75         | 28-Sep          | Recovered | Pune                | GR           | 20B               | B.1.1.32         | 2620537     | 777404                 | 29779                 | 99.585                  |

Contid....

| Specimen ID      | GISAID Accession ID | Virus name                        | Gender | Age (Year) | Collection date | Outcome   | Location (District) | GISAID Clade | Next Strain Clade | Pangolin Lineage | Total Reads | Reads Utilized in IRMA | Genome Length Covered | % Genome Length Covered |
|------------------|---------------------|-----------------------------------|--------|------------|-----------------|-----------|---------------------|--------------|-------------------|------------------|-------------|------------------------|-----------------------|-------------------------|
| 2019nCoV-229297  | EPI_ISL_577710      | hCoV-19/India/MH-NIV-229297/2020  | Male   | 56         | 28-Sep          | Recovered | Pune                | GR           | 20B               | B.1.1.32         | 1118060     | 1059374                | 29779                 | 99.585                  |
| 2019nCoV-229360  | EPI_ISL_577711      | hCoV-19/India/MH-NIV-229360/2020  | Male   | 72         | 29-Sep          | Recovered | Pune                | GR           | 20B               | B.1.1            | 2123405     | 942943                 | 29516                 | 98.706                  |
| 2019nCoV-229453  | EPI_ISL_577712      | hCoV-19/India/MH-NIV-229453/2020  | Female | 43         | 29-Sep          | Recovered | Pune                | G            | 20A               | B.1              | 1729435     | 934734                 | 29779                 | 99.585                  |
| 2019nCoV-229460  | EPI_ISL_577713      | hCoV-19/India/MH-NIV-229460/2020  | Male   | 27         | 28-Sep          | Recovered | Pune                | GR           | 20B               | B.1.1.32         | 2628904     | 950378                 | 29779                 | 99.585                  |
| 2019nCoV-QC-1803 | EPI_ISL_577714      | hCoV-19/India/KA-NIV-QC-1803/2020 | Male   | 40         | Sep             | Recovered | Bangalore           | GH           | 20A               | B.1.113          | 2834874     | 37276                  | 29507                 | 98.676                  |
| 2019nCoV-QC-1801 | EPI_ISL_577715      | hCoV-19/India/KA-NIV-QC-1801/2020 | Female | 40         | Sep             | Recovered | Bangalore           | GH           | 20A               | B.1.113          | 2012442     | 206559                 | 29559                 | 98.85                   |
| 2019nCoV-206457  | EPI_ISL_577716      | hCoV-19/India/MH-NIV-206457/2020  | Female | 26         | 10-Sep          | Recovered | Pune                | GR           | 20B               | B.1.1            | 1358537     | 355674                 | 29429                 | 98.415                  |
| 2019nCoV-229388  | EPI_ISL_577717      | hCoV-19/India/MH-NIV-229388/2020  | Female | 35         | 29-Sep          | Recovered | Pune                | GR           | 20B               | B.1.1.32         | 3419949     | 938715                 | 29779                 | 99.585                  |
| 2019nCoV-227726  | EPI_ISL_577718      | hCoV-19/India/MH-NIV-227726/2020  | Male   | 35         | Sep             | Recovered | Pune                | G            | 20A               | B.1              | 3071946     | 924804                 | 29779                 | 99.585                  |
| 2019nCoV-226708  | EPI_ISL_577719      | hCoV-19/India/MH-NIV-226708/2020  | Female | 30         | Sep             | Recovered | Pune                | GR           | 20B               | B.1.1.32         | 2528822     | 948721                 | 29779                 | 99.585                  |
| 2019nCoV-226709  | EPI_ISL_577720      | hCoV-19/India/MH-NIV-226709/2020  | Male   | 30         | 25-Sep          | Recovered | Pune                | GR           | 20B               | B.1.1.32         | 1683924     | 944763                 | 29779                 | 99.585                  |
| 2019nCoV-227244  | EPI_ISL_577721      | hCoV-19/India/MH-NIV-227244/2020  | Female | 65         | 26-Sep          | Recovered | Pune                | GR           | 20B               | B.1.1.32         | 151023      | 50458                  | 29377                 | 98.241                  |
| 2019nCoV-227243  | EPI_ISL_577722      | hCoV-19/India/MH-NIV-227243/2020  | Female | 36         | 26-Sep          | Recovered | Pune                | GH           | 20A               | B.1.113          | 1953534     | 923289                 | 29779                 | 99.585                  |
| 2019nCoV-227512  | EPI_ISL_577723      | hCoV-19/India/MH-NIV-227512/2020  | Male   | 48         | 26-Sep          | Recovered | Pune                | GR           | 20B               | B.1.1.32         | 2961374     | 942398                 | 29779                 | 99.585                  |
| 2019nCoV-QC-1377 | EPI_ISL_577724      | hCoV-19/India/MH-NIV-QC-1377/2020 | Male   | 35         | 22-Jul          | Recovered | Pune                | G            | 20A               | B.1.5            | 93801       | 57912                  | 28737                 | 96.101                  |
| 2019nCoV-QC-1379 | EPI_ISL_577725      | hCoV-19/India/MH-NIV-QC-1379/2020 | Male   | 44         | 21-Jul          | Recovered | Pune                | GR           | 20B               | B.1.1            | 253283      | 141257                 | 29557                 | 98.843                  |
| 2019nCoV-QC-1381 | EPI_ISL_577726      | hCoV-19/India/MH-NIV-QC-1381/2020 | Male   | 44         | 22-Jul          | Recovered | Pune                | GR           | 20B               | B.1.1            | 205188      | 111597                 | 29593                 | 98.963                  |
| 2019nCoV-QC-1444 | EPI_ISL_577727      | hCoV-19/India/MH-NIV-QC-1444/2020 | Male   | 61         | 08-Sep          | Recovered | Pune                | GH           | 20A               | B.1.113          | 1841528     | 949823                 | 29779                 | 99.585                  |

Contid...

| Specimen ID      | GISAID Accession ID | Virus name                        | Gender | Age (Year) | Collection date | Outcome   | Location (District) | GISAID Clade | Next Strain Clade | Pangolin Lineage | Total Reads | Reads Utilized in IRMA | Genome Length Covered | % Genome Length Covered |
|------------------|---------------------|-----------------------------------|--------|------------|-----------------|-----------|---------------------|--------------|-------------------|------------------|-------------|------------------------|-----------------------|-------------------------|
| 2019nCoV-QC-1450 | EPI_ISL_577728      | hCoV-19/India/MH-NIV-QC-1450/2020 | Male   | 49         | 08-Sep          | Recovered | Pune                | GR           | 20B               | B.1.1            | 421741      | 37984                  | 29642                 | 99.127                  |
| 2019nCoV-QC-1405 | EPI_ISL_577729      | hCoV-19/India/MH-NIV-QC-1405/2020 | Female | 24         | 25-Jul          | Recovered | Pune                | GR           | 20B               | B.1.1.32         | 258272      | 218559                 | 29779                 | 99.585                  |
| 2019nCoV-QC-1844 | EPI_ISL_577730      | hCoV-19/India/MH-NIV-QC-1844/2020 | Male   | 12         | 15-Sep          | Recovered | Pune                | GR           | 20B               | B.1.1.32         | 2800549     | 928437                 | 29779                 | 99.585                  |
| 2019nCoV-QC-1848 | EPI_ISL_577731      | hCoV-19/India/MH-NIV-QC-1848/2020 | Female | 56         | 13-Sep          | Recovered | Pune                | GR           | 20B               | B.1.1.32         | 2441857     | 942467                 | 29779                 | 99.585                  |
| 2019nCoV-QC-1822 | EPI_ISL_577732      | hCoV-19/India/MH-NIV-QC-1822/2020 | Female | 47         | Sep             | Recovered | Pune                | G            | 20A               | B.1              | 2983822     | 98512                  | 29779                 | 99.585                  |
| 2019nCoV-QC-1804 | EPI_ISL_577733      | hCoV-19/India/MH-NIV-QC-1804/2020 | Female | 73         | Sep             | Recovered | Pune                | GR           | 20B               | B.1.1.32         | 3351936     | 936729                 | 29779                 | 99.585                  |
| 2019nCoV-229543  | EPI_ISL_582241      | hCoV-19/India/MH-NIV-229543/2020  | Female | 18         | 28-Sep          | Recovered | Pune                | GR           | 20B               | B.1.1.32         | 1367271     | 916405                 | 29779                 | 99.585                  |
